# Supplementary material for: TBAI-catalyzed selective synthesis of sulfonamides and β-aryl sulfonyl enamines: coupling of arenesulfonyl chlorides and sodium sulfinates with tert-amines
Source: Royal Society of Chemistry journal article supplement (doi:10.1039/c8ob02992j), 2019-01-01

# TBAI-catalyzed selective synthesis of sulfonamides and $\beta$ -aryl sulfonyl Enamines: coupling of arenesulfonyl chlorides and sodium sulfinates with *tert*-amines

Hongmei Jiang,<sup>ab</sup> Xiaoyue Tang,<sup>a</sup> Zhihui Xu,<sup>b</sup> Huixian Wang,<sup>a</sup> Kang Han,<sup>a</sup> Xiaolan Yang,<sup>a</sup> Yuanyuan Zhou,<sup>a</sup> Yong-Lai Feng,<sup>a</sup> Xian-Yong Yu,<sup>c</sup> and Qingwen Gui<sup>ab\*</sup>

<sup>a</sup> College of Science, Hunan Agricultural University, Changsha 410128, People's Republic of China  
E-mail: gqw1216@163.com; gqw1216@hunau.edu.cn

<sup>b</sup> State Key Laboratory of Chemo/Biosensing and Chemometrics, College of Chemistry and Chemical Engineering, Hunan University, Changsha 410082, P. R. China

<sup>c</sup> Key Laboratory of Theoretical Organic Chemistry and Functional Molecule of Ministry of Education, Hunan University of Science and Technology, Taoyuan Road No. 9, Xiangtan 411201, China

## Contents of Supporting Information:

|                                                                      |     |
|----------------------------------------------------------------------|-----|
| 1. General Information                                               | S1  |
| 2. Spectral Data for the sulfonamides <b>3a-r</b> and <b>4a-h</b>    | S2  |
| 3. Spectral Data for the $\beta$ -aryl sulfonyl Enamines <b>5a-o</b> | S8  |
| 4. References                                                        | S12 |
| 5. Proton and Carbon NMR Spectra                                     | S13 |

## 1. General Information

All reactions were carried out in anhydrous solvent using commercially available reagents that were purchased and used as received. Analytical thin layer chromatography (TLC) was performed on pre-coated 0.25 mm thick silica gel 60-F<sub>254</sub> plates (*Merck* or *Whatman PE SIL G/UV*); visualized using UV light and by treatment with a KMnO<sub>4</sub>, followed by heating. All compounds were purified by flash chromatography using silica gel 100-200 (Greagent G72651J) and gave spectroscopic data consistent with being  $\geq 95\%$  the assigned structure. <sup>1</sup>H NMR and <sup>13</sup>C NMR spectra were recorded on a *Bruker Avance 400* spectrometer in CDCl<sub>3</sub> at ambient temperature; chemical shifts ( $\delta$ ) are given in ppm and calibrated using the signal of residual undeuterated solvent as internal reference ( $\delta_{\text{H}} = 7.26$  ppm and  $\delta_{\text{C}} = 77.16$  ppm). IR spectra were recorded on an Agilent Technologies Cary 630 FT-IR (ATR) or Perkin-Elmer FT-IR Spectrum 100 (ATR) spectrometer; wavenumbers ( $\nu$ ) are given in cm<sup>-1</sup>.

### The reaction of *N*-methyl-*N*-ethyl aniline with 4-methoxybenzenesulfonyl chloride

Using *N*-methyl-*N*-ethyl aniline as the substrate, we examined the regioselectivity and generality of this reaction. As shown in Scheme S1, the reaction of 4-methoxybenzenesulfonyl chloride with *N*-methyl-*N*-ethyl aniline gave a mixture of sulfonamides in THF.

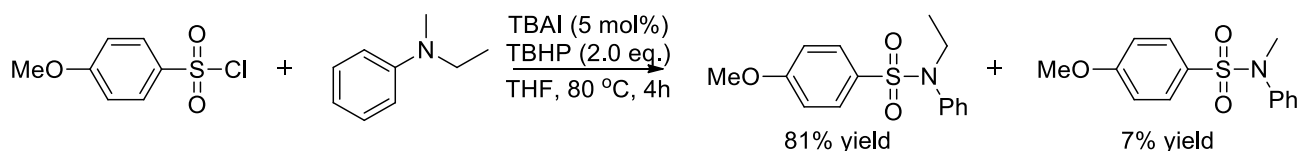

**Scheme S1, The reaction of 4-methoxybenzenesulfonyl chloride with *N*-methyl-*N*-ethyl aniline**

## 2. Spectral Data for the Spectral Data for the sulfonamides 3a-r and 4a-h

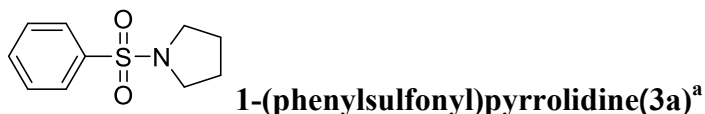

*Color and State:* Yellow oil.

<sup>1</sup>H NMR (400 MHz, CDCl<sub>3</sub>)  $\delta$  7.83 (d,  $J = 8.0$  Hz, 2H), 7.60 (d,  $J = 8.0$  Hz, 1H), 7.54 (t,  $J = 8.0$  Hz, 2H), 3.24 (t,  $J = 8.0$  Hz, 4H), 1.74 (t,  $J = 4.0$  Hz, 4H).

<sup>13</sup>C NMR (101 MHz, CDCl<sub>3</sub>)  $\delta$  136.7, 132.6, 129.0, 127.3, 47.9, 25.1.

IR (Neat): 3055, 2850, 1311, 1149, 720 cm<sup>-1</sup>

MS:  $m/z$  C<sub>10</sub>H<sub>13</sub>NO<sub>2</sub>S 211.3 (M<sup>+</sup>)

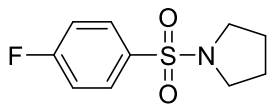

**1-((4-fluorophenyl)sulfonyl)pyrrolidine (3b)<sup>b</sup>**

*Color and State:* White solid. m.p. 67-68 °C

<sup>1</sup>H NMR (400 MHz, CDCl<sub>3</sub>) δ 7.79-7.76 (m, 2H), 7.14 (t, *J* = 8.0 Hz, 2H), 3.15 (t, *J* = 8.0 Hz, 4H), 1.78 (t, *J* = 4.0 Hz, 4H).

<sup>13</sup>C NMR (101 MHz, CDCl<sub>3</sub>) δ 166.3, 163.8, 133.1, 133.0, 130.1, 130.0, 116.3, 116.1, 47.9, 25.2.

<sup>19</sup>F NMR (376 MHz, CDCl<sub>3</sub>) δ -105.6.

IR (Neat): 2963, 2858, 1347, 1159, 1112, 721 cm<sup>-1</sup>

MS: m/z C<sub>10</sub>H<sub>12</sub>FNO<sub>2</sub>S 229.3 (M<sup>+</sup>)

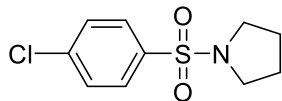

**1-((4-chlorophenyl)sulfonyl)pyrrolidine (3c)<sup>c</sup>**

*Color and State:* Brown solid. m.p. 78-79 °C

<sup>1</sup>H NMR (400 MHz, CDCl<sub>3</sub>) δ 7.69 (d, *J* = 8.0 Hz, 2H), 7.43 (d, *J* = 8.0 Hz, 2H), 3.15 (t, *J* = 4.0 Hz, 4H), 1.69 (s, 4H).

<sup>13</sup>C NMR (101 MHz, CDCl<sub>3</sub>) δ 138.9, 135.4, 129.3, 128.8, 47.9, 25.2.

IR (Neat): 2977, 2865, 1454, 1350, 1161, 720 cm<sup>-1</sup>

MS: m/z C<sub>10</sub>H<sub>12</sub>ClNO<sub>2</sub>S 245.7 (M<sup>+</sup>)

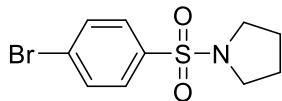

**1-((4-bromophenyl)sulfonyl)pyrrolidine (3d)<sup>c</sup>**

*Color and State:* White solid. m.p. 102-104 °C

<sup>1</sup>H NMR (400 MHz, CDCl<sub>3</sub>) δ 7.63-7.58 (m, 4H), 3.15 (t, *J* = 8.0 Hz, 4H), 1.70 (d, *J* = 4.0 Hz, 4H).

<sup>13</sup>C NMR (101 MHz, CDCl<sub>3</sub>) δ 136.0, 132.3, 128.9, 127.5, 47.9, 25.2.

IR (Neat): 2982, 1448, 1334, 1162, 761 cm<sup>-1</sup>

MS: m/z C<sub>10</sub>H<sub>12</sub>BrNO<sub>2</sub>S 290.2 (M<sup>+</sup>)

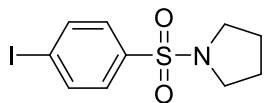

**1-((4-iodophenyl)sulfonyl)pyrrolidine (3e)<sup>d</sup>**

*Color and State:* Yellow solid. m.p. 141-143 °C

<sup>1</sup>H NMR (400 MHz, CDCl<sub>3</sub>) δ 7.81 (d, *J* = 4.0 Hz, 2H), 7.46 (d, *J* = 8.0 Hz, 2H), 3.15 (t, *J* = 8.0 Hz, 4H), 1.69 (d, *J* = 8.0 Hz, 4H).

<sup>13</sup>C NMR (101 MHz, CDCl<sub>3</sub>) δ 138.2, 136.6, 128.8, 99.9, 47.9, 25.2.

IR (Neat): 2954, 2856, 1472, 13647, 1165, 728 cm<sup>-1</sup>

MS: m/z C<sub>10</sub>H<sub>12</sub>INO<sub>2</sub>S 337.2 (M<sup>+</sup>)

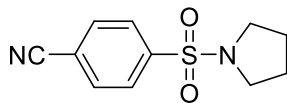

**4-(pyrrolidin-1-ylsulfonyl)benzonitrile (3f)**

*Color and State:* White solid. m.p. 111-113 °C

<sup>1</sup>H NMR (400 MHz, CDCl<sub>3</sub>) δ 7.97 (d, *J* = 8.0 Hz, 2H), 7.88 (d, *J* = 8.0 Hz, 2H), 3.28 (s, 4H), 1.8 (d, *J* = 2.0 Hz, 4H).

<sup>13</sup>C NMR (101 MHz, CDCl<sub>3</sub>) δ 141.2, 132.9, 127.9, 117.4, 116.1, 48.0, 25.2.

IR (Neat): 2953, 2862, 1488, 1456, 1165, 845 cm<sup>-1</sup>

HRMS(ESI):Cald for C<sub>11</sub>H<sub>13</sub>N<sub>2</sub>O<sub>2</sub>S[MH]<sup>+</sup>:m/z 237.0692; found: 237.0688.

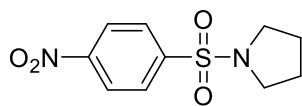

**1-((4-nitrophenyl)sulfonyl)pyrrolidine (3g)<sup>e</sup>**

*Color and State:* White solid. m.p. 131-132 °C

<sup>1</sup>H NMR (400 MHz, CDCl<sub>3</sub>) δ 8.40 (d, *J* = 12.0 Hz, 2H), 8.04 (d, *J* = 8.0 Hz, 2H), 3.30 (t, *J* = 8.0 Hz, 4H), 1.83 (t, *J* = 8.0 Hz, 4H).

<sup>13</sup>C NMR (101 MHz, CDCl<sub>3</sub>) δ 150.1, 143.1, 128.6, 124.4, 48.1, 25.4.

IR (Neat): 2974, 2936, 1600, 1518, 1465, 1349, 1152, 771 cm<sup>-1</sup>

MS: m/z C<sub>10</sub>H<sub>12</sub>N<sub>2</sub>O<sub>4</sub>S 256.3 (M<sup>+</sup>)

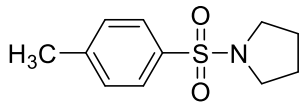

**1-tosylpyrrolidine (3h)<sup>a</sup>**

*Color and State:* White solid. m.p. 133-134 °C

<sup>1</sup>H NMR (400 MHz, CDCl<sub>3</sub>) δ 7.71 (d, *J* = 8.0 Hz, 2H), 7.31 (d, *J* = 8.0 Hz, 2H), 3.22 (t, *J* = 8.0 Hz, 4H), 2.43 (s, 3H), 1.75 (d, *J* = 4.0 Hz, 4H).

<sup>13</sup>C NMR (101 MHz, CDCl<sub>3</sub>) δ 143.3, 133.8, 129.6, 127.5, 47.9, 25.1, 21.4.

IR (Neat): 3010, 2845, 1456, 1327, 729 cm<sup>-1</sup>

MS: m/z C<sub>11</sub>H<sub>15</sub>NO<sub>2</sub>S 225.3 (M<sup>+</sup>)

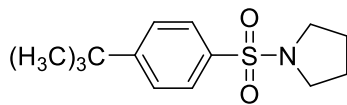

**1-((4-(tert-butyl)phenyl)sulfonyl)pyrrolidine (3i)<sup>f</sup>**

*Color and State:* White solid. m.p. 138-139 °C

<sup>1</sup>H NMR (400 MHz, CDCl<sub>3</sub>) δ 7.76 (d, *J* = 4.0 Hz, 2H), 7.53 (d, *J* = 8.0 Hz, 2H), 3.25 (s, 4H), 1.76 (d, *J* = 1.6 Hz, 4H), 1.35 (s, 9H).

<sup>13</sup>C NMR (101 MHz, CDCl<sub>3</sub>) δ 156.2, 133.8, 127.4, 126.0, 47.9, 35.1, 31.1, 25.2.

IR (Neat): 3010, 2838, 1448, 1325, 725 cm<sup>-1</sup>

MS: m/z C<sub>14</sub>H<sub>21</sub>NO<sub>2</sub>S 267.4 (M<sup>+</sup>)

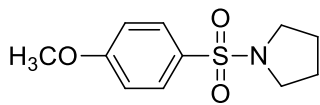

**1-((4-methoxyphenyl)sulfonyl)pyrrolidine (3j)<sup>a</sup>**

*Color and State:* White solid. m.p. 165-166 °C

<sup>1</sup>H NMR (400 MHz, CDCl<sub>3</sub>) δ 7.76 (d, *J* = 8.0 Hz, 2H), 7.01 (d, *J* = 8.0 Hz, 2H), 3.87 (s, 3H), 3.21 (s, 4H), 1.74 (d, *J* = 1.6 Hz, 4H).

<sup>13</sup>C NMR (101 MHz, CDCl<sub>3</sub>) δ 162.8, 129.4, 128.2, 114.1, 55.5, 47.8, 25.0.

IR (Neat): 2975, 2853, 1454, 1347, 1162, 719 cm<sup>-1</sup>

MS: m/z C<sub>11</sub>H<sub>15</sub>NO<sub>3</sub>S 241.3 (M<sup>+</sup>)

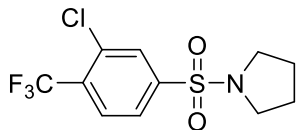

**1-((3-chloro-4-(trifluoromethyl)phenyl)sulfonyl)pyrrolidine (3k)**

*Color and State:* Yellow solid. m.p. 87-89 °C

<sup>1</sup>H NMR (400 MHz, CDCl<sub>3</sub>) δ 8.14 (s, 1H), 1.95 (d, *J* = 8.0 Hz, 1H), 1.71 (d, *J* = 12.0 Hz, 1H), 3.17 (t, *J* = 8.0 Hz, 4H), 1.85 (d, *J* = 4.0 Hz, 4H).

<sup>13</sup>C NMR (101 MHz, CDCl<sub>3</sub>) δ 137.1, 136.8, 132.5, 131.6, 129.6, 129.3, 126.7, 126.7, 126.6, 126.6, 123.5, 120.8, 48.1, 25.4.

<sup>19</sup>F NMR (376 MHz, CDCl<sub>3</sub>) δ -63.0.

**IR** (Neat): 2929, 1405, 1323, 1134, 711  $\text{cm}^{-1}$

**HRMS**(ESI):Cald for  $\text{C}_{11}\text{H}_{12}\text{ClF}_3\text{NO}_2\text{S}[\text{MH}]^+$ :m/z 314.0224; found: 314.0222.

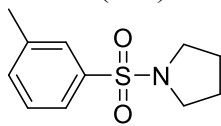

**1-(m-tolylsulfonyl)pyrrolidine (3l)**

**Color and State:** Brown solid. m.p. 134-135  $^{\circ}\text{C}$

**$^1\text{H}$  NMR** (400 MHz,  $\text{CDCl}_3$ )  $\delta$  7.63 (d,  $J$  = 8.0 Hz, 2H), 7.41 (t,  $J$  = 12.0 Hz, 2H), 3.24 (s, 4H), 2.43 (s, 3H), 1.75 (s, 4H).

**$^{13}\text{C}$  NMR** (101 MHz,  $\text{CDCl}_3$ )  $\delta$  139.14, 136.55, 133.42, 128.87, 127.79, 124.58, 47.92, 25.18, 21.37.

**IR** (Neat): 2971, 2852, 1451, 1346, 1165, 721  $\text{cm}^{-1}$

**HRMS**(ESI):Cald for  $\text{C}_{11}\text{H}_{16}\text{NO}_2\text{S}[\text{MH}]^+$ :m/z 226.0896; found: 226.0892.

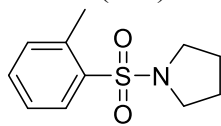

**1-(o-tolylsulfonyl)pyrrolidine (3m)**

**Color and State:** Yellow oil.

**$^1\text{H}$  NMR** (400 MHz,  $\text{CDCl}_3$ )  $\delta$  7.90 (d,  $J$  = 8.0 Hz, 1H), 7.44 (t,  $J$  = 8.0 Hz, 1H), 7.31 (t,  $J$  = 4.0 Hz, 2H), 3.30 (t,  $J$  = 4.0 Hz, 4H), 2.64 (s, 3H), 1.89 (m, 4H).

**$^{13}\text{C}$  NMR** (101 MHz,  $\text{CDCl}_3$ )  $\delta$  137.8, 137.0, 132.6, 129.4, 127.5, 126.0, 47.3, 25.5, 20.6.

**IR** (Neat): 2980, 2857, 1455, 1346, 723  $\text{cm}^{-1}$

**MS:** m/z  $\text{C}_{11}\text{H}_{15}\text{NO}_2\text{S}$  225.3 (M<sup>+</sup>)

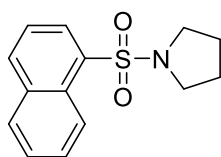

**1-(naphthalen-1-ylsulfonyl)pyrrolidine (3n)<sup>g</sup>**

**Color and State:** White solid. m.p. 79-81  $^{\circ}\text{C}$

**$^1\text{H}$  NMR** (400 MHz,  $\text{CDCl}_3$ )  $\delta$  8.73 (d,  $J$  = 12.0 Hz, 1H), 8.09 (d,  $J$  = 4.0 Hz, 1H), 1.90 (d,  $J$  = 8.0 Hz, 1H), 7.87 (d,  $J$  = 8.0 Hz, 1H), 7.51 (t,  $J$  = 8.0 Hz, 1H), 7.45-7.37 (m, 2H), 3.21 (t,  $J$  = 8.0 Hz, 4H), 1.65 (t,  $J$  = 4.0 Hz, 4H).

**$^{13}\text{C}$  NMR** (101 MHz,  $\text{CDCl}_3$ )  $\delta$  134.3, 134.1, 133.8, 129.5, 129.0, 128.8, 127.9, 126.7, 125.2, 124.1, 47.5, 25.4.

**IR** (Neat): 2970, 2864, 1367, 1151, 726  $\text{cm}^{-1}$

**MS:** m/z  $\text{C}_{14}\text{H}_{15}\text{NO}_2\text{S}$  261.3 (M<sup>+</sup>)

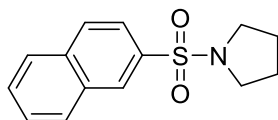

**1-(naphthalen-2-ylsulfonyl)pyrrolidine (3o)<sup>g</sup>**

**Color and State:** White solid. m.p. 106-107  $^{\circ}\text{C}$

**$^1\text{H}$  NMR** (400 MHz,  $\text{CDCl}_3$ )  $\delta$  8.41 (s, 1H), 7.97 (d,  $J$  = 8.0 Hz, 2H), 7.90 (d,  $J$  = 8.0 Hz, 1H), 7.84 (d,  $J$  = 8.0 Hz, 1H), 7.64-7.58 (m, 2H), 3.30 (s, 4H), 1.71 (s, 4H).

**$^{13}\text{C}$  NMR** (101 MHz,  $\text{CDCl}_3$ )  $\delta$  134.69, 133.85, 132.07, 129.19, 129.09, 128.60, 128.58, 127.82, 127.44, 122.83, 47.96, 25.16.

**IR** (Neat): 2955, 2860, 1367, 1150, 723  $\text{cm}^{-1}$

**MS:** m/z  $\text{C}_{14}\text{H}_{15}\text{NO}_2\text{S}$  261.3 (M<sup>+</sup>)

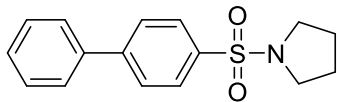

**1-([1,1'-biphenyl]-4-ylsulfonyl)pyrrolidine (3p)**

*Color and State:* White solid. m.p. 139-141 °C

**<sup>1</sup>H NMR** (400 MHz, CDCl<sub>3</sub>) δ 7.89 (d, *J* = 8.0 Hz, 2H), 7.72 (d, *J* = 8.0 Hz, 2H), 7.60 (d, *J* = 8.0 Hz, 2H), 7.46 (t, *J* = 8.0 Hz, 2H), 7.40 (d, *J* = 8.0 Hz, 1H), 3.27 (t, *J* = 8.0 Hz, 4H), 1.75 (t, *J* = 8.0 Hz, 4H).

**<sup>13</sup>C NMR** (101 MHz, CDCl<sub>3</sub>) δ 145.3, 139.1, 135.4, 129.0, 128.4, 128.0, 127.5, 127.2, 47.9, 25.2.

**IR** (Neat): 2955, 2846, 1355, 1156, 760 cm<sup>-1</sup>

**HRMS**(ESI):Cald for C<sub>16</sub>H<sub>18</sub>NO<sub>2</sub>S[MH]<sup>+</sup>:m/z 288.1053; found: 288.1048.

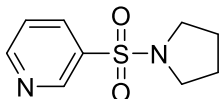

**3-(pyrrolidin-1-ylsulfonyl)pyridine (3q)<sup>h</sup>**

*Color and State:* Yellow solid. m.p. 75-76 °C

**<sup>1</sup>H NMR** (400 MHz, CDCl<sub>3</sub>) δ 8.97 (s, 1H), 8.76 (d, *J* = 4.0 Hz, 1H), 8.06 (d, *J* = 8.0 Hz, 1H), 7.46 (t, *J* = 8.0 Hz, 1H), 3.20 (t, *J* = 8.0 Hz, 4H), 1.72 (s, 4H).

**<sup>13</sup>C NMR** (101 MHz, CDCl<sub>3</sub>) δ 153.06, 147.86, 134.92, 133.60, 123.78, 47.84, 25.13.

**IR** (Neat): 3052, 2976, 2839, 1426, 1151, 746 cm<sup>-1</sup>

**MS:** m/z C<sub>9</sub>H<sub>12</sub>N<sub>2</sub>O<sub>2</sub>S 212.3 (M<sup>+</sup>)

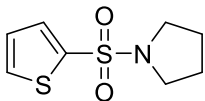

**1-(thiophen-2-ylsulfonyl)pyrrolidine (3r)**

*Color and State:* Brown solid. m.p. 75-77 °C

**<sup>1</sup>H NMR** (400 MHz, CDCl<sub>3</sub>) δ 7.64 (d, *J* = 4.0 Hz, 1H), 7.59 (d, *J* = 4.0 Hz, 1H), 7.16 (t, *J* = 4.0 Hz, 1H), 3.29 (t, *J* = 8.0 Hz, 4H), 1.77 (t, *J* = 8.0 Hz, 4H).

**<sup>13</sup>C NMR** (101 MHz, CDCl<sub>3</sub>) δ 136.6, 132.0, 131.7, 127.5, 48.2, 25.2.

**IR** (Neat): 3114, 1964, 1334, 1150 1017, 742 cm<sup>-1</sup>

**HRMS**(ESI):Cald for C<sub>8</sub>H<sub>12</sub>NO<sub>2</sub>S<sub>2</sub>[MH]<sup>+</sup>:m/z 218.0304; found: 218.0300.

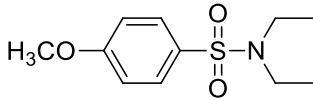

***N,N*-diethyl-4-methoxybenzenesulfonamide (4a)<sup>j</sup>**

*Color and State:* Yellow oil.

**<sup>1</sup>H NMR** (400 MHz, CDCl<sub>3</sub>) δ 7.74 (d, *J* = 8.0 Hz, 2H), 6.96 (d, *J* = 8.0 Hz, 2H), 3.86 (s, 3H), 3.24-3.19 (m, 4H), 1.12 (t, *J* = 8.0 Hz, 6H).

**<sup>13</sup>C NMR** (101 MHz, CDCl<sub>3</sub>) δ 162.7, 132.1, 129.2, 114.2, 55.7, 42.0, 14.2.

**IR** (Neat): 2978, 2942, 1498, 1324, 1156, 736 cm<sup>-1</sup>

**MS:** m/z C<sub>11</sub>H<sub>17</sub>NO<sub>3</sub>S 243.3 (M<sup>+</sup>)

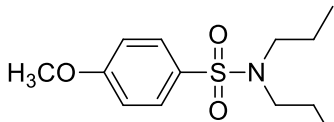

**4-methoxy-*N,N*-dipropylbenzenesulfonamide (4b)**

*Color and State:* Yellow oil.

**<sup>1</sup>H NMR** (400 MHz, CDCl<sub>3</sub>) δ 7.73 (d, *J* = 8.0 Hz, 2H), 6.97 (d, *J* = 8.0 Hz, 2H), 3.86 (s, 3H), 3.05 (t, *J* = 8.0 Hz, 4H), 1.57-1.52 (m, 4H), 0.87 (t, *J* = 8.0 Hz, 6H).

**<sup>13</sup>C NMR** (101 MHz, CDCl<sub>3</sub>) δ 162.6, 131.7, 129.1, 114.1, 50.0, 32.9, 22.0, 11.2.

**IR** (Neat): 2980, 2942, 1495, 1340, 1156, 736 cm<sup>-1</sup>

**HRMS(ESI):** Calcd for  $C_{13}H_{22}NO_3S[MH]^+$ : m/z 272.1315; found: 272.1311.

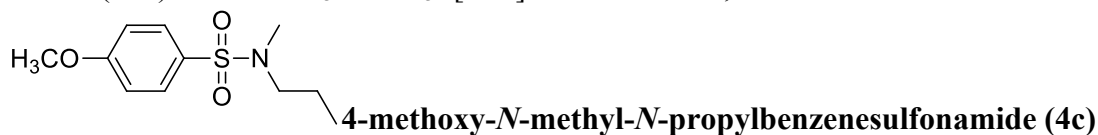

*Color and State:* Yellow oil.

**$^1H$  NMR** (400 MHz,  $CDCl_3$ )  $\delta$  7.61 (d,  $J = 8.0$  Hz, 2H), 6.90 (d,  $J = 8.0$  Hz, 2H), 3.76 (s, 3H), 2.84 (t,  $J = 8.0$  Hz, 2H), 2.59 (s, 3H), 1.49-1.40 (m, 2H), 0.82 (t,  $J = 4.0$  Hz, 3H)

**$^{13}C$  NMR** (101 MHz,  $CDCl_3$ )  $\delta$  162.7, 129.3, 129.1, 114.1, 55.5, 51.7, 34.5, 20.8, 11.0.

**IR** (Neat): 2984, 2940, 1498, 1145, 737  $cm^{-1}$

**HRMS(ESI):** Calcd for  $C_{11}H_{18}NO_3S[MH]^+$ : m/z 244.1002; found: 244.1002.

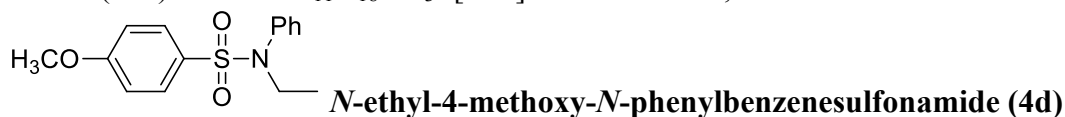

*Color and State:* Brown oil.

**$^1H$  NMR** (400 MHz,  $CDCl_3$ )  $\delta$  7.53 (d,  $J = 8.0$  Hz, 2H), 7.31 (d,  $J = 4.0$  Hz, 3H), 7.05 (d,  $J = 8.0$  Hz, 2H), 6.91 (d,  $J = 8.0$  Hz, 2H), 3.86 (s, 3H), 3.62-3.57 (m, 2H), 1.07 (t,  $J = 8.0$  Hz, 3H).

**$^{13}C$  NMR** (101 MHz,  $CDCl_3$ )  $\delta$  162.9, 139.1, 130.3, 129.9, 129.1, 129.1, 127.9, 114.0, 55.7, 45.6, 14.1.

**IR** (Neat): 3025, 1446, 1341, 1166, 741  $cm^{-1}$

**HRMS(ESI):** Calcd for  $C_{15}H_{18}NO_3S[MH]^+$ : m/z 292.1002; found: 292.1000.

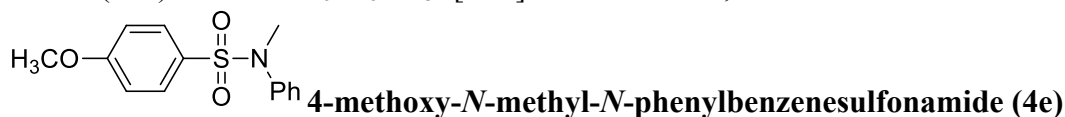

*Color and State:* Brown oil.

**$^1H$  NMR** (400 MHz,  $CDCl_3$ )  $\delta$  7.40 (d,  $J = 8.0$  Hz, 2H), 7.24-7.16 (m, 3H), 7.03 (d,  $J = 8.0$  Hz, 2H), 6.83 (d,  $J = 8.0$  Hz, 2H), 3.78 (s, 3H), 3.08 (s, 3H).

**$^{13}C$  NMR** (101 MHz,  $CDCl_3$ )  $\delta$  163.1, 141.8, 130.1, 128.9, 128.3, 127.4, 126.8, 114.0, 55.7, 38.2.

**IR** (Neat): 3020, 1449, 1340, 1162, 732  $cm^{-1}$

**HRMS(ESI):** Calcd for  $C_{14}H_{16}NO_3S[MH]^+$ : m/z 278.0845; found: 278.0840.

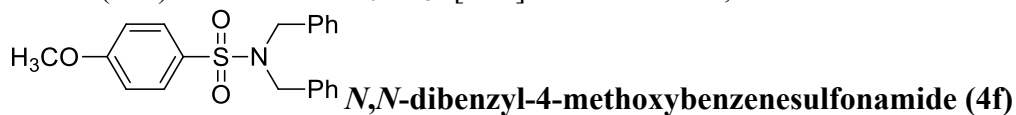

*Color and State:* Yellow solid. m.p. 63-65  $^{\circ}C$

**$^1H$  NMR** (400 MHz,  $CDCl_3$ )  $\delta$  7.70 (d,  $J = 8.0$  Hz, 2H), 7.30 (d,  $J = 8.0$  Hz, 1H), 7.27 (d,  $J = 8.0$  Hz, 1H), 7.23 (d,  $J = 8.0$  Hz, 1H), 7.13 (s, 3H), 6.99 (s, 4H), 6.89 (d,  $J = 8.0$  Hz, 2H), 4.23 (s, 4H), 3.80 (s, 3H).

**$^{13}C$  NMR** (101 MHz,  $CDCl_3$ )  $\delta$  162.9, 135.9, 132.5, 129.4, 128.7, 128.5, 127.7, 114.3, 55.8, 50.6.

**IR** (Neat): 2994, 1456, 1346, 1166, 723  $cm^{-1}$

**MS:** m/z  $C_{21}H_{21}NO_3S$  367.5 (M<sup>+</sup>)

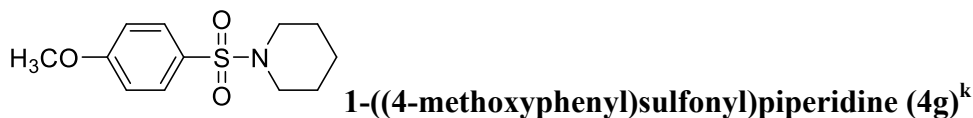

*Color and State:* Brown solid. m.p. 105-108  $^{\circ}C$

**<sup>1</sup>H NMR** (400 MHz, CDCl<sub>3</sub>) δ 7.68 (d, *J* = 8.0 Hz, 2H), 7.01 (d, *J* = 8.0 Hz, 2H), 3.87 (s, 3H), 2.95 (t, *J* = 4.0 Hz, 4H), 1.63 (t, *J* = 4.0 Hz, 4H), 1.42 (d, *J* = 4.0 Hz, 2H).

**<sup>13</sup>C NMR** (101 MHz, CDCl<sub>3</sub>) δ 162.8, 129.6, 127.6, 114.1, 55.6, 46.9, 25.1, 23.4.

**IR** (Neat): 3055, 2855, 1440, 1320, 1050, 763 cm<sup>-1</sup>

**MS**: *m/z* C<sub>12</sub>H<sub>17</sub>NO<sub>3</sub>S 255.3 (M<sup>+</sup>)

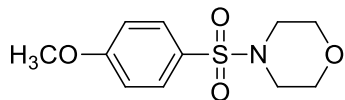

**4-((4-methoxyphenyl)sulfonyl)morpholine (4h)<sup>k</sup>**

**Color and State**: Brown solid. m.p. 155-156 °C

**<sup>1</sup>H NMR** (400 MHz, CDCl<sub>3</sub>) δ 7.69 (d, *J* = 8.0 Hz, 2H), 7.02 (d, *J* = 8.0 Hz, 2H), 3.88 (s, 3H), 3.73 (s, 4H), 2.97 (s, 4H).

**<sup>13</sup>C NMR** (101 MHz, CDCl<sub>3</sub>) δ 163.2, 129.9, 126.4, 114.3, 66.0, 55.6, 46.0.

**IR** (Neat): 2921, 2856, 1449, 1350, 1169, 935 cm<sup>-1</sup>

**MS**: *m/z* C<sub>11</sub>H<sub>15</sub>NO<sub>4</sub>S 257.3 (M<sup>+</sup>)

### 3. Spectral Data for the β-aryl sulfonyl Enamines 5a-o

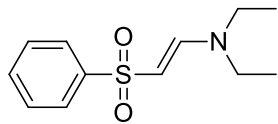

**(E)-N,N-diethyl-2-(phenylsulfonyl)ethenamine (5a)<sup>j</sup>**

**Color and State**: white solid. m.p. 45-46 °C

**<sup>1</sup>H NMR** (400 MHz, CDCl<sub>3</sub>) δ 7.86-7.85 (m, 2H), 7.47-7.46 (m, 3H), 7.32 (d, *J* = 12.6 Hz, 1H), 4.91 (d, *J* = 12.6 Hz, 1H), 3.24 (broad doublet, 4H), 1.15 (bs, 6H).

**<sup>13</sup>C NMR** (101 MHz, CDCl<sub>3</sub>) δ 149.2, 145.4, 131.6, 128.9, 126.2, 91.3, 50.2, 42.5, 14.6, 11.2.

**IR** (Neat): 3069, 2977, 2936, 2875, 1614, 1452, 1468 cm<sup>-1</sup>

**MS**: *m/z* C<sub>12</sub>H<sub>17</sub>NO<sub>2</sub>S 239.3 (M<sup>+</sup>)

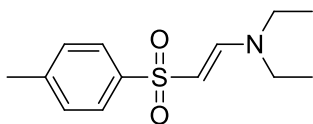

**(E)-N,N-diethyl-2-tosylethen-1-amine (5b)<sup>j</sup>**

**Color and State**: Brown oil.

**<sup>1</sup>H NMR** (400 MHz, CDCl<sub>3</sub>) δ 7.65 (d, *J* = 8.0 Hz, 2H), 7.20-7.16 (m, 3H), 4.82 (d, *J* = 12.7 Hz, 1H), 3.08 (broad doublet, 4H), 2.31 (s, 3H), 1.06 (bs, 6H).

**<sup>13</sup>C NMR** (101 MHz, CDCl<sub>3</sub>) δ 148.8, 142.6, 142.1, 129.5, 126.2, 91.8, 50.0, 42.6, 21.5, 14.6, 11.5.

**IR** (Neat): 3076, 2977, 2935, 2876, 1617, 1493, 1450 cm<sup>-1</sup>

**MS**: *m/z* C<sub>13</sub>H<sub>19</sub>NO<sub>2</sub>S 253.4 (M<sup>+</sup>)

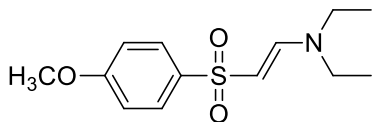

**(E)-N,N-diethyl-2-((4-methoxyphenyl)sulfonyl)ethen-1-amine (5c)<sup>j</sup>**



*Color and State:* Brown oil.

**<sup>1</sup>H NMR** (400 MHz, CDCl<sub>3</sub>) δ 7.81 (d, *J* = 8.0 Hz, 2H), 7.33 (d, *J* = 12.7 Hz, 1H), 6.97 (d, *J* = 8.0 Hz, 2H), 4.93 (d, *J* = 12.7 Hz, 1H), 3.88 (s, 3H), 3.17 (broad doublet, 4H), 1.18 (bs, 6H).

**<sup>13</sup>C NMR** (101 MHz, CDCl<sub>3</sub>) δ 162.1, 148.6, 137.4, 128.3, 114.0, 92.1, 55.6, 50.1, 42.8, 14.8, 13.8.

**IR** (Neat): 3069, 2975, 2934, 2872, 1612, 1495, 1460 cm<sup>-1</sup>

**MS:** m/z C<sub>13</sub>H<sub>19</sub>NO<sub>3</sub>S 269.4 (M<sup>+</sup>)

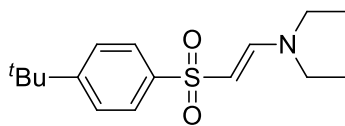

**(E)-2-((4-(tert-butyl)phenyl)sulfonyl)-N,N-diethylethen-1-amine (5d)<sup>j</sup>**

*Color and State:* Brown oil.

**<sup>1</sup>H NMR** (400 MHz, CDCl<sub>3</sub>) δ 7.69 (d, *J* = 8.0 Hz, 2H), 7.39 (d, *J* = 8.0 Hz, 2H), 7.21 (d, *J* = 12.7 Hz, 1H), 4.84 (d, *J* = 12.7 Hz, 1H), 3.11 (broad doublet, 4H), 1.26 (s, 9H), 1.08 (bs, 6H).

**<sup>13</sup>C NMR** (101 MHz, CDCl<sub>3</sub>) δ 155.2, 148.9, 142.4, 126.1, 125.9, 91.7, 50.0, 42.8, 35.1, 31.3, 14.8, 11.3.

**IR** (Neat): 3077, 2982, 2932, 2870, 1613, 1494, 1456 cm<sup>-1</sup>

**MS:** m/z C<sub>16</sub>H<sub>25</sub>NO<sub>2</sub>S 295.4 (M<sup>+</sup>)

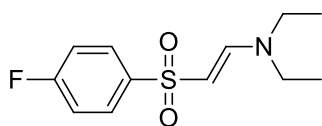

**(E)-N,N-diethyl-2-((4-fluorophenyl)sulfonyl)ethen-1-amine (5e)<sup>j</sup>**

*Color and State:* Brown oil.

**<sup>1</sup>H NMR** (400 MHz, CDCl<sub>3</sub>) δ 7.79-7.76 (dd, *J* = 8.0 Hz, *J* = 4.0 Hz, 2H), 7.24 (d, *J* = 12.6 Hz, 1H), 7.05 (t, *J* = 8.0 Hz, 2H), 4.81 (d, *J* = 12.6 Hz, 1H), 3.10 (broad doublet, 4H), 1.13 (bs, 6H).

**<sup>13</sup>C NMR** (101 MHz, CDCl<sub>3</sub>) δ 165.7, 163.2, 149.2, 141.6, 128.2, 128.7, 116.0, 115.8, 91.1, 49.9, 43.0, 14.7, 11.0.

**<sup>19</sup>F NMR** (376 MHz, CDCl<sub>3</sub>) δ -107.7.

**IR** (Neat): 3073, 2979, 2934, 2881, 1615, 1493, 1469 cm<sup>-1</sup>

**MS:** m/z C<sub>12</sub>H<sub>16</sub>FNO<sub>2</sub>S 257.3 (M<sup>+</sup>)

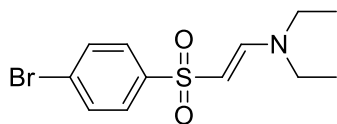

**(E)-2-((4-bromophenyl)sulfonyl)-N,N-diethylethen-1-amine (5f)<sup>j</sup>**

*Color and State:* Brown solid. m.p. 75-76 °C

**<sup>1</sup>H NMR** (400 MHz, CDCl<sub>3</sub>) δ 7.64 (d, *J* = 8.0 Hz, 2H), 7.51 (d, *J* = 8.0 Hz, 2H), 7.23 (d, *J* = 12.7 Hz, 1H), 4.80 (d, *J* = 12.7 Hz, 1H), 3.18 (broad doublet, 4H), 1.12 (bs, 6H).

**<sup>13</sup>C NMR** (101 MHz, CDCl<sub>3</sub>) δ 149.4, 144.6, 132.1, 127.9, 126.2, 90.9, 50.2, 42.8, 14.8, 11.2.

**IR** (Neat): 3069, 2969, 2920, 2850, 1610, 1569 cm<sup>-1</sup>

**MS:** m/z C<sub>12</sub>H<sub>16</sub>BrNO<sub>2</sub>S 318.2 (M<sup>+</sup>)

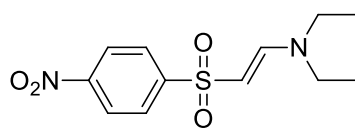

**(E)-N,N-diethyl-2-((4-nitrophenyl)sulfonyl)ethen-1-amine (5g)<sup>l</sup>**

*Color and State:* Yellow solid. m.p. 111-112 °C

**<sup>1</sup>H NMR** (400 MHz, CDCl<sub>3</sub>) δ 8.22 (d, *J* = 8.0 Hz, 2H), 7.95, (d, *J* = 8.0 Hz, 2H), 7.27 (d, *J* = 12.7 Hz, 1H), 4.82 (d, *J* = 12.7 Hz, 1H), 3.15 (broad doublet, 4H), 1.13 (bs, 6H).

**<sup>13</sup>C NMR** (101 MHz, CDCl<sub>3</sub>) δ 151.4, 150.4, 149.4, 127.4, 124.3, 89.8, 50.5, 43.0, 14.8, 11.2.

**IR** (Neat): 3364, 2920, 1535, 1348, 1147 cm<sup>-1</sup>

**MS**: *m/z* C<sub>12</sub>H<sub>16</sub>N<sub>2</sub>O<sub>4</sub>S 284.3 (M<sup>+</sup>)

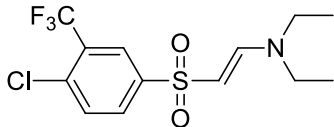

**(E)-2-((4-chloro-3-(trifluoromethyl)phenyl)sulfonyl)-N,N-**

**diethylethen-1-amine (5h)**

*Color and State*: Brown solid. m.p. 90-91 °C

**<sup>1</sup>H NMR** (400 MHz, CDCl<sub>3</sub>) δ 8.09 (s, 1H), 7.88 (d, *J* = 8.0 Hz, 1H), 7.54-7.51 (m, 1H), 7.25 (d, *J* = 12.6 Hz, 1H), 4.80 (d, *J* = 12.6 Hz, 1H), 3.14 (broad doublet, 4H), 1.10 (bs, 6H).

**<sup>13</sup>C NMR** (101 MHz, CDCl<sub>3</sub>) δ 150.1, 144.9, 132.2, 130.5, 125.8, 125.7, 123.7, 121.0, 90.0, 50.4, 43.0, 14.8, 11.2.

**<sup>19</sup>F NMR** (376 MHz, CDCl<sub>3</sub>) δ -62.9.

**IR** (Neat): 3064, 2976, 2935, 2872, 1615, 1468 cm<sup>-1</sup>

**HRMS**(ESI): Calcd for C<sub>13</sub>H<sub>16</sub>ClF<sub>3</sub>NO<sub>3</sub>S[MH]<sup>+</sup>: *m/z* 342.0537; found: 342.0532.

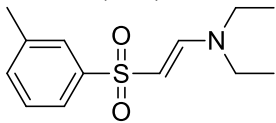

**(E)-N,N-diethyl-2-(m-tolylsulfonyl)ethen-1-amine (5i)<sup>j</sup>**

*Color and State*: Brown oil.

**<sup>1</sup>H NMR** (400 MHz, CDCl<sub>3</sub>) δ 7.70-7.63 (m, 2H), 7.36-7.29 (m, 3H), 4.90 (d, *J* = 12.7 Hz, 1H), 3.18 (broad doublet, 4H), 2.40 (s, 3H), 1.14 (bs, 6H).

**<sup>13</sup>C NMR** (101 MHz, CDCl<sub>3</sub>) δ 149.0, 145.2, 139.0, 132.4, 128.8, 126.6, 123.3, 91.5, 50.2, 42.7, 21.5, 15.0, 11.1.

**IR** (Neat): 3080, 2935, 2876, 1615, 1490, 1455 cm<sup>-1</sup>

**MS**: *m/z* C<sub>13</sub>H<sub>19</sub>NO<sub>2</sub>S 253.4 (M<sup>+</sup>)

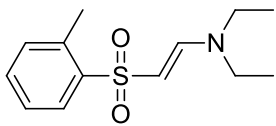

**(E)-N,N-diethyl-2-(o-tolylsulfonyl)ethen-1-amine (5j)<sup>j</sup>**

*Color and State*: Brown oil.

**<sup>1</sup>H NMR** (400 MHz, CDCl<sub>3</sub>) δ 8.02 (d, *J* = 8.0 Hz, 1H), 7.41-7.37 (m, 1H), 7.31-7.25 (m, 3H), 4.92 (d, *J* = 12.7 Hz, 1H), 4.18 (broad doublet, 4H), 2.62 (s, 3H), 1.16 (bs, 6H).

**<sup>13</sup>C NMR** (101 MHz, CDCl<sub>3</sub>) δ 149.6, 142.8, 132.3, 131.9, 129.5, 127.8, 126.2, 90.6, 50.1, 42.9, 20.3, 14.9, 11.2.

**IR** (Neat): 3066, 2976, 2922, 2871, 1613, 1493, 1468 cm<sup>-1</sup>

**MS**: *m/z* C<sub>13</sub>H<sub>19</sub>NO<sub>2</sub>S 253.4 (M<sup>+</sup>)

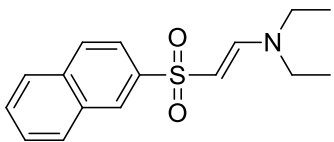

**(E)-N,N-diethyl-2-(naphthalen-2-ylsulfonyl)ethen-1-amine (5k)**

*Color and State:* Yellow solid. m.p. 124-125 °C

**<sup>1</sup>H NMR** (400 MHz, CDCl<sub>3</sub>) δ 8.35 (s, 1H), 7.85-7.82 (m, 2H), 7.80-7.73 (m, 2H), 7.53-7.45 (m, 2H), 7.29 (d, *J* = 12.7 Hz, 1H), 4.89 (d, *J* = 12.7 Hz, 1H), 3.11 (broad doublet, 4H), 1.07 (bs, 6H).

**<sup>13</sup>C NMR** (101 MHz, CDCl<sub>3</sub>) δ 149.2, 142.3, 134.5, 132.5, 129.3, 129.2, 128.3, 127.9, 127.3, 126.6, 122.5, 50.2, 42.8, 14.9, 11.2.

**IR** (Neat): 3070, 2975, 2930, 2872, 1612, 1495, 1465 cm<sup>-1</sup>

**HRMS**(ESI): Calcd for C<sub>16</sub>H<sub>20</sub>NO<sub>2</sub>S[MH]<sup>+</sup>: m/z 290.1209; found: 290.1205.

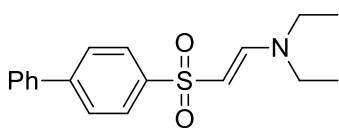

**(E)-2-([1,1'-biphenyl]-4-ylsulfonyl)-N,N-diethylethen-1-amine (5l)**

*Color and State:* Yellow solid. m.p. 102-104 °C

**<sup>1</sup>H NMR** (400 MHz, CDCl<sub>3</sub>) δ 7.84 (d, *J* = 8.0 Hz, 2H), 7.59 (d, *J* = 8.0 Hz, 2H), 7.51 (d, *J* = 8.0 Hz, 2H), 7.38 (t, *J* = 8.0 Hz, 2H), 7.32 (d, *J* = 8.0 Hz, 1H), 7.27 (d, *J* = 12.7 Hz, 1H), 4.88 (d, *J* = 12.7 Hz, 1H), 3.11 (broad doublet, 4H), 1.09 (bs, 6H).

**<sup>13</sup>C NMR** (101 MHz, CDCl<sub>3</sub>) δ 149.2, 144.5, 144.1, 139.9, 129.1, 128.3, 127.6, 127.4, 126.8, 91.6, 50.2, 42.8, 14.9, 11.3.

**IR** (Neat): 3071, 2976, 2922, 2871, 1613, 1493, 1468 cm<sup>-1</sup>

**HRMS**(ESI): Calcd for C<sub>18</sub>H<sub>21</sub>NO<sub>2</sub>S[MH]<sup>+</sup>: m/z 316.1366; found: 316.1362.

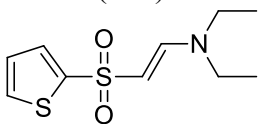

**(E)-N,N-diethyl-2-(thiophen-2-ylsulfonyl)ethen-1-amine (5m)<sup>m</sup>**

*Color and State:* Brown oil

**<sup>1</sup>H NMR** (400 MHz, CDCl<sub>3</sub>) δ 7.45 (d, *J* = 4.0 Hz, 1H), 7.41 (d, *J* = 4.0 Hz, 1H), 7.27 (d, *J* = 12.6 Hz, 1H), 6.94 (t, *J* = 4.0 Hz, 1H), 4.96 (d, *J* = 12.6 Hz, 1H), 3.12 (broad doublet, 4H), 1.10 (bs, 6H).

**<sup>13</sup>C NMR** (101 MHz, CDCl<sub>3</sub>) δ 149.3, 148.3, 130.6, 130.0, 127.2, 92.5, 50.2, 43.0, 14.9, 11.3.

**IR** (Neat): 3078, 2976, 2934, 2875, 1613, 1507 cm<sup>-1</sup>

**MS:** m/z C<sub>10</sub>H<sub>15</sub>NO<sub>2</sub>S<sub>2</sub> 245.4 (M<sup>+</sup>)

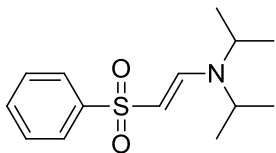

**(E)-N-isopropyl-N-(2-(phenylsulfonyl)vinyl)propan-2-amine (5n)<sup>l</sup>**

*Color and State:* Brown oil.

**<sup>1</sup>H NMR** (400 MHz, CDCl<sub>3</sub>) δ 7.77 (d, *J* = 8.0 Hz, 2H), 7.40-7.38 (m, 3H), 7.33 (d, *J* = 12.8 Hz, 1H), 4.90 (d, *J* = 12.8 Hz, 1H), 3.53 (broad doublet, 2H), 1.14 (bs, 12H).

**<sup>13</sup>C NMR** (101 MHz, CDCl<sub>3</sub>) δ 145.6, 145.4, 131.5, 128.9, 126.2, 92.4, 49.4, 47.7, 23.6, 19.8.

**IR** (Neat): 3074, 2976, 2925, 2869, 1607, 1542 cm<sup>-1</sup>

**MS:** m/z C<sub>14</sub>H<sub>21</sub>NO<sub>2</sub>S 267.4 (M<sup>+</sup>)

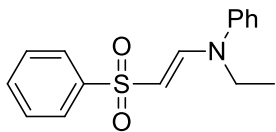

**(E)-N-ethyl-N-(2-(phenylsulfonyl)vinyl)aniline (5o)**

*Color and State:* Brown oil.

**<sup>1</sup>H NMR** (400 MHz, CDCl<sub>3</sub>) δ 7.88 (d, *J* = 8.0 Hz, 2H), 7.53 (d, *J* = 12.2 Hz, 1H), 7.53-7.46 (m, 3H), 7.37 (t, *J* = 8.0 Hz, 2H), 7.20 (t, *J* = 8.0 Hz, 1H), 7.14 (d, *J* = 8.0 Hz, 2H), 5.27 (d, *J* = 12.2 Hz, 1H), 3.67-3.61 (m, 2H), 1.20 (t, *J* = 8.0 Hz, 3H).

**<sup>13</sup>C NMR** (101 MHz, CDCl<sub>3</sub>) δ 144.5, 132.0, 129.8, 129.7, 129.0, 127.0, 126.4, 125.8, 124.3, 97.5, 40.2, 13.1.

**IR** (Neat): 3068, 2970, 2903, 2852, 1610, 1492, 1467 cm<sup>-1</sup>

**HRMS**(ESI): Calcd for C<sub>16</sub>H<sub>18</sub>NO<sub>2</sub>S[MH]<sup>+</sup>: m/z 288.1053; found: 288.1051.

#### 4. References

- (a) S. Yotphan, L. Sumunnee, D. Beukeaw, C. Buathongjan, V. Reutrakul, *Org. Biomol. Chem.* **2016**, *14*, 590; (b) M. K. Narayanam, G. Ma, P. A. Champagne, K. N. Houk, J. M. Murphy, *Angew. Chem. Int. Ed.* **2017**, *56*, 13006; (c) X. Tang, L. Huang, C. Qi, W. Wu, H. Jiang, *Chem. Commun.* **2013**, *49*, 6102; (d) G. Cheng, S. Muench, Y. Zhou, G. A. Afanador, E. J. Mui, A. Fomovska, B. S. Lai, S. T. Prigge, C. W. Roberts, M. R. Hickman, P. J. Lee, S. E. Leed, J. M. Auschwitz, D. W. Rice, R. Meleod, *Bio. Med. Chem. Lett.* **2013**, *23*, 2035; (e) T.-Y. Xu, S.-L. Zhang, G.-Q. Dong, X.-Z. Liu, X. Wang, X.-Q. Lv, Q.-J. Qian, R.-Y. Zhang, C.-Q. Sheng, C.-Y. Miao, *Scientific Reports*, **2015**, *5*, 10043; (f) H. Zhu, Y. Shen, Q. Deng, C. Huang, T. Tu, *Chem. Asian J.* **2017**, *12*, 706; (g) V. Hojat, *Bulletin Korean Chem. Society*, **2012**, *33*, 383; (h) H. Wollven, C. González-Rodríguez, I. Marco, A. L. Thompson, M. C. Wills, *Org. Lett.* **2011**, *13*, 4876; (j) J. Lai, L. Chang, G. Yuan, *Org. Lett.* **2016**, *18*, 3194; (k) S. K. R. Parumala, R. K. Peddinti, *Tetrahedron Lett.* **2016**, *57*, 1232; (l) Y. Cai, R. Zhang, D. Sun, S. Xu, Q. Zhou, *Synlett*, **2017**, *28*, 1630; (m) M. Chen, Z.-T. Huang, Q.-Y. Zheng, *Org. Biomol. Chem.* **2014**, *12*, 9337.

## 5. Proton and Carbon NMR Spectra

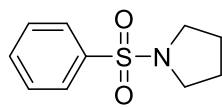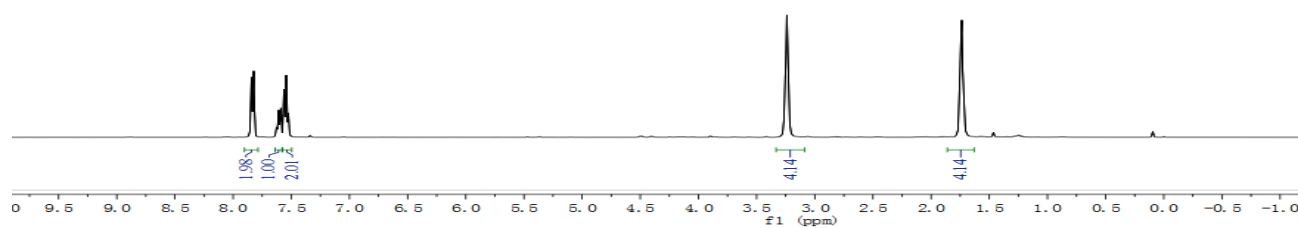

136.70  
132.66  
129.05  
127.40

77.59  
77.27  
76.95

41.95

25.18

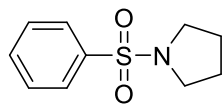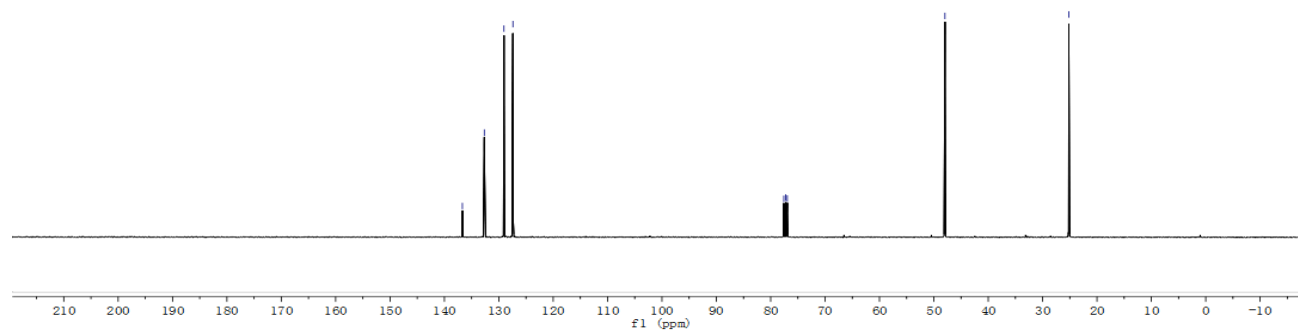

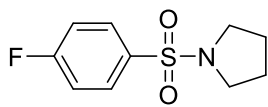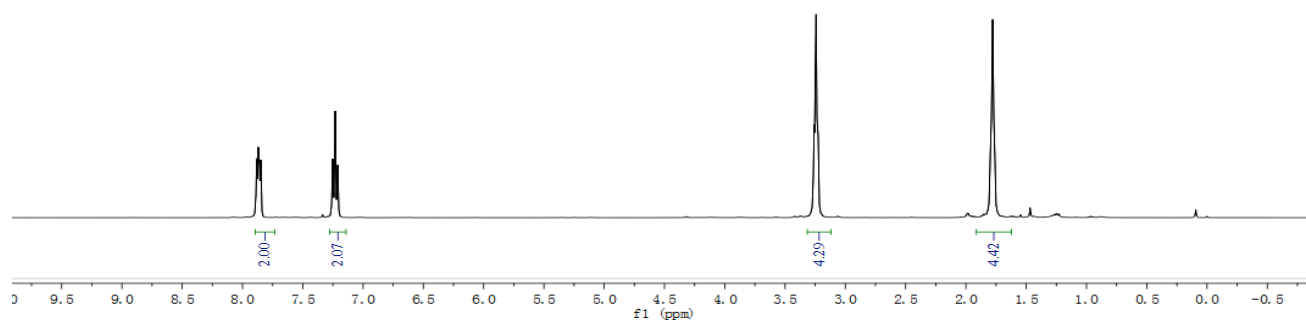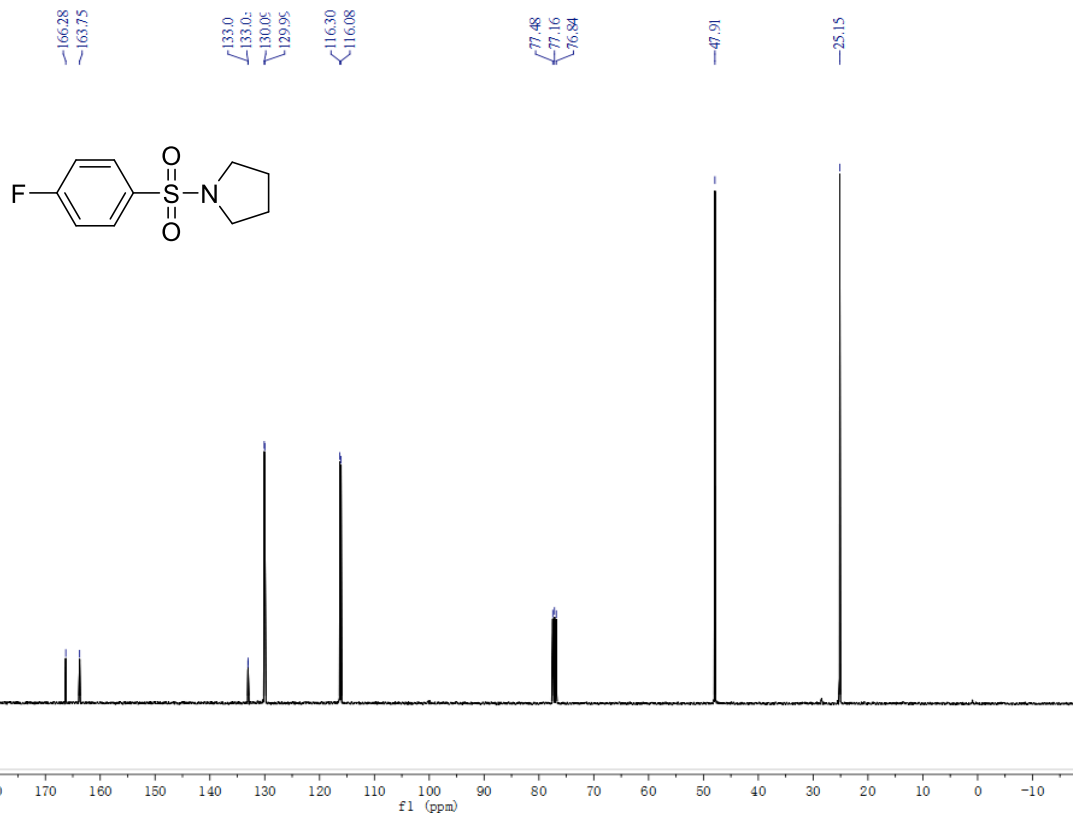

20190201-XZH-88  
19F

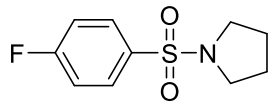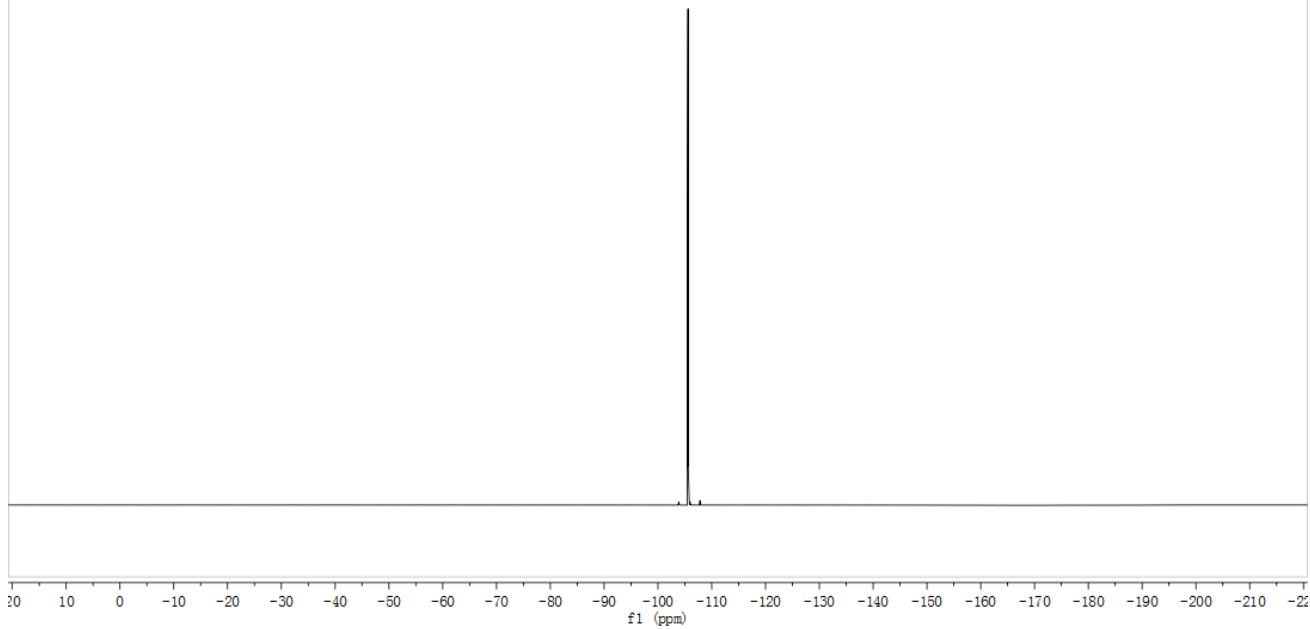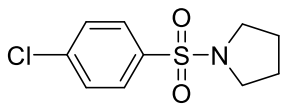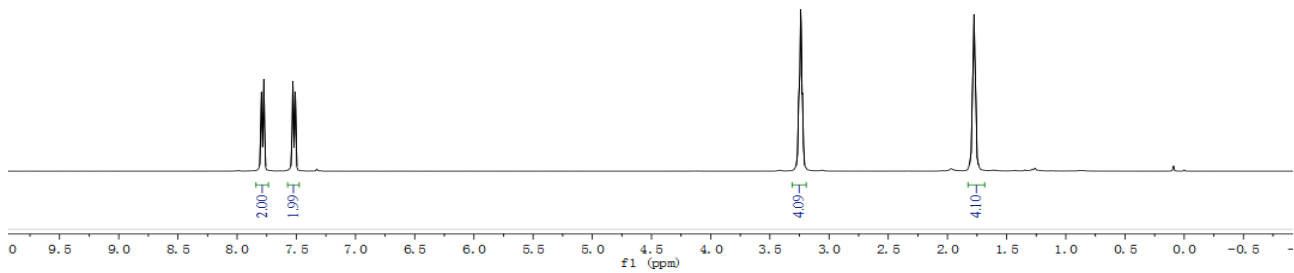

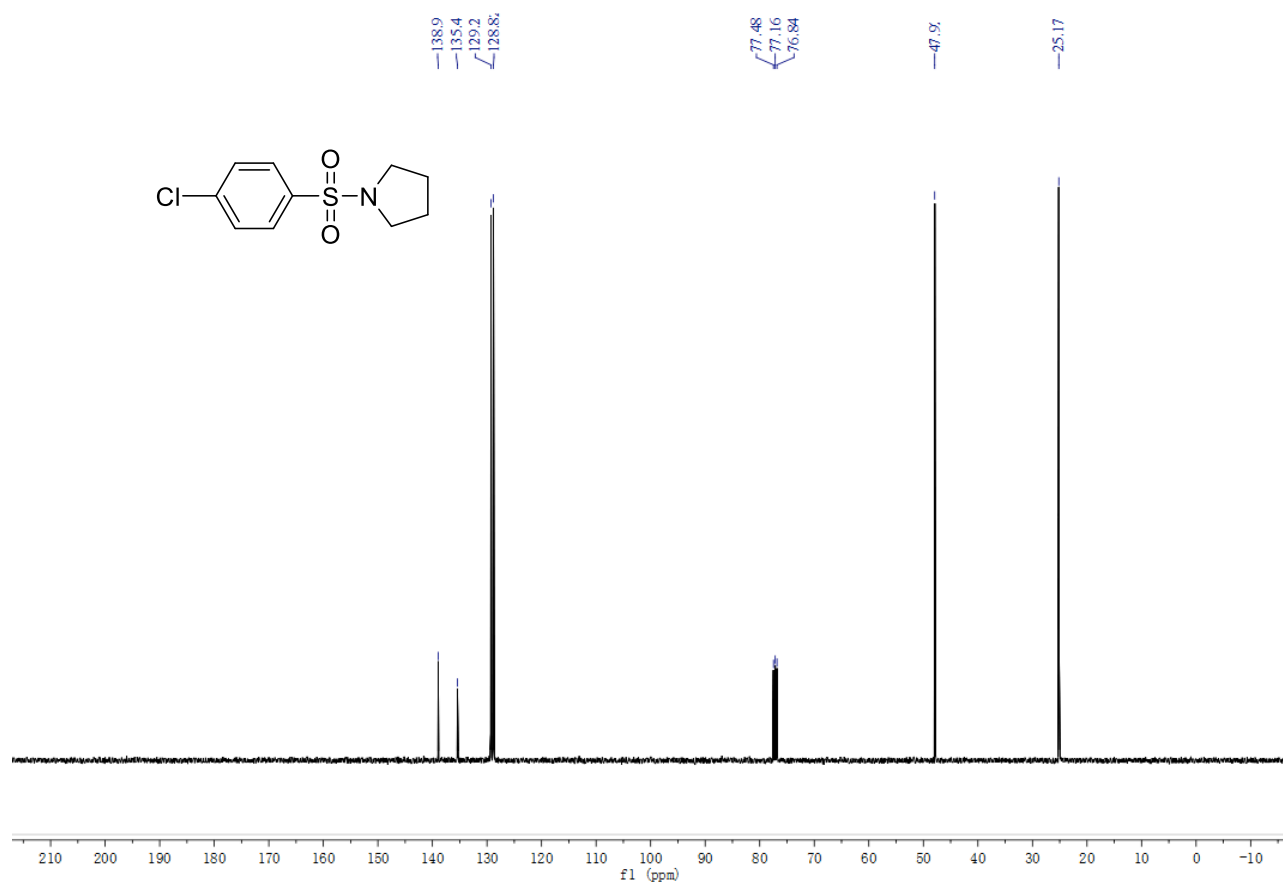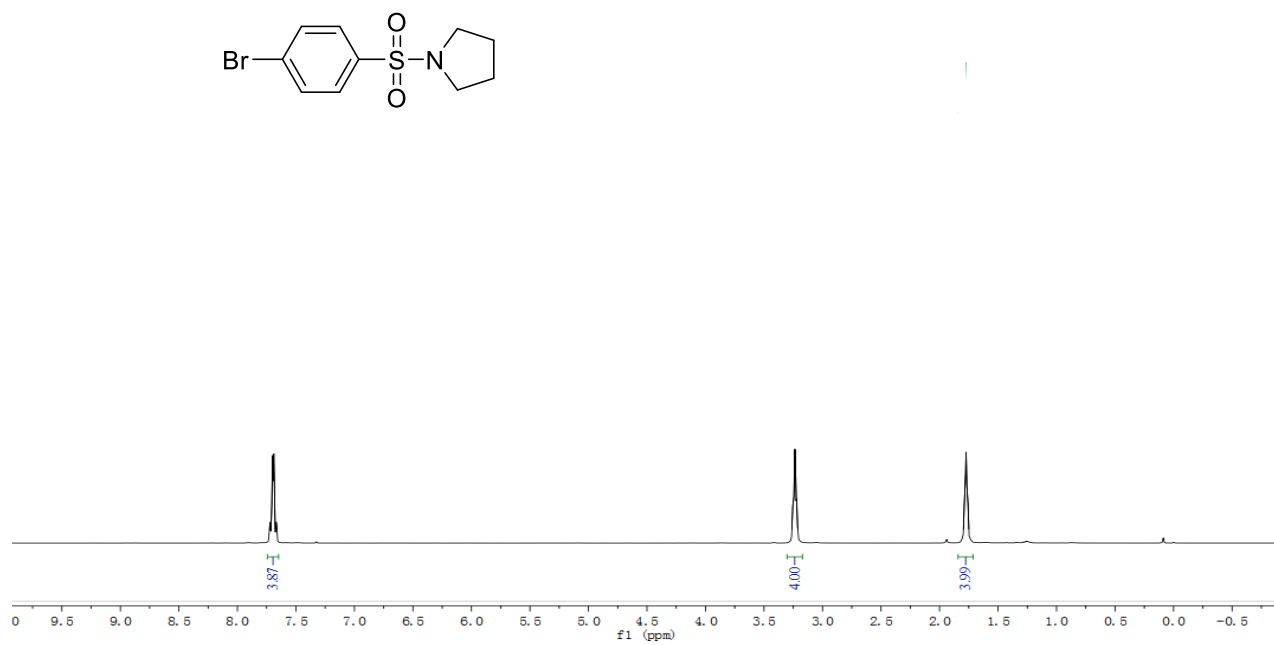



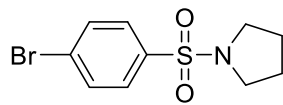

135.95  
132.25  
128.91  
127.45

77.48  
77.16  
76.84

47.92

25.18

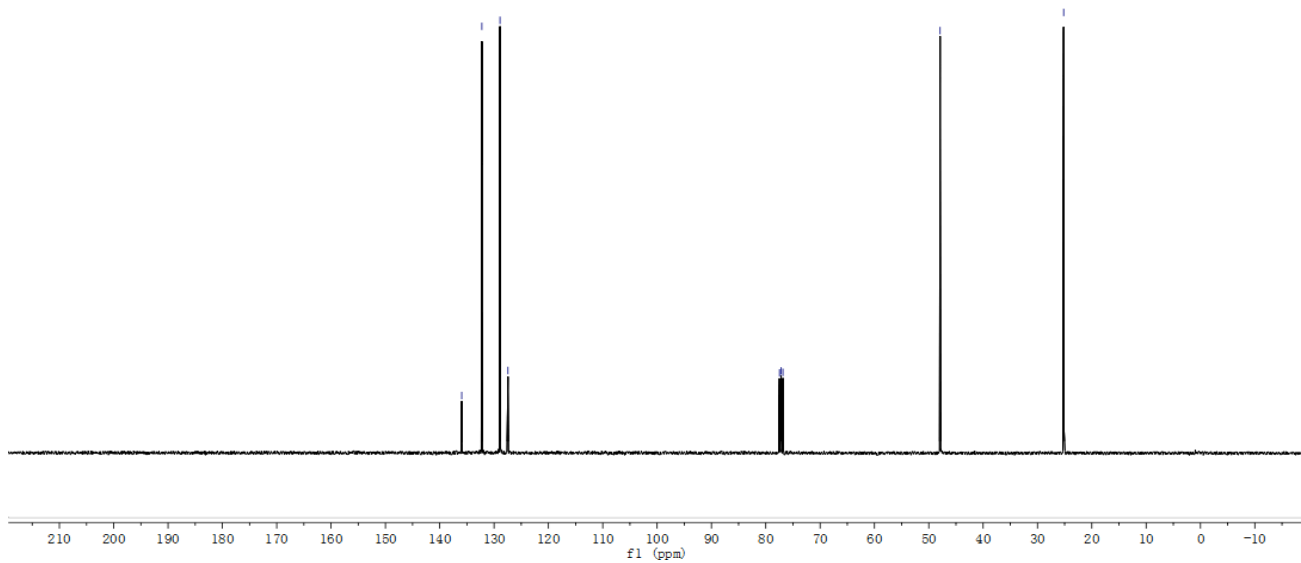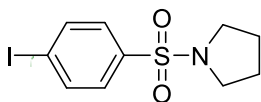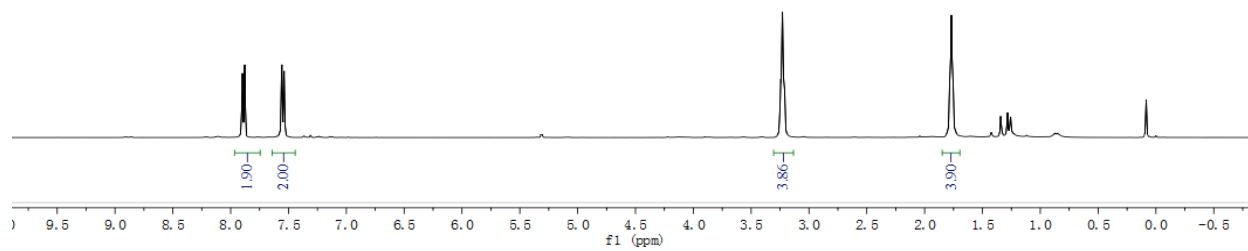

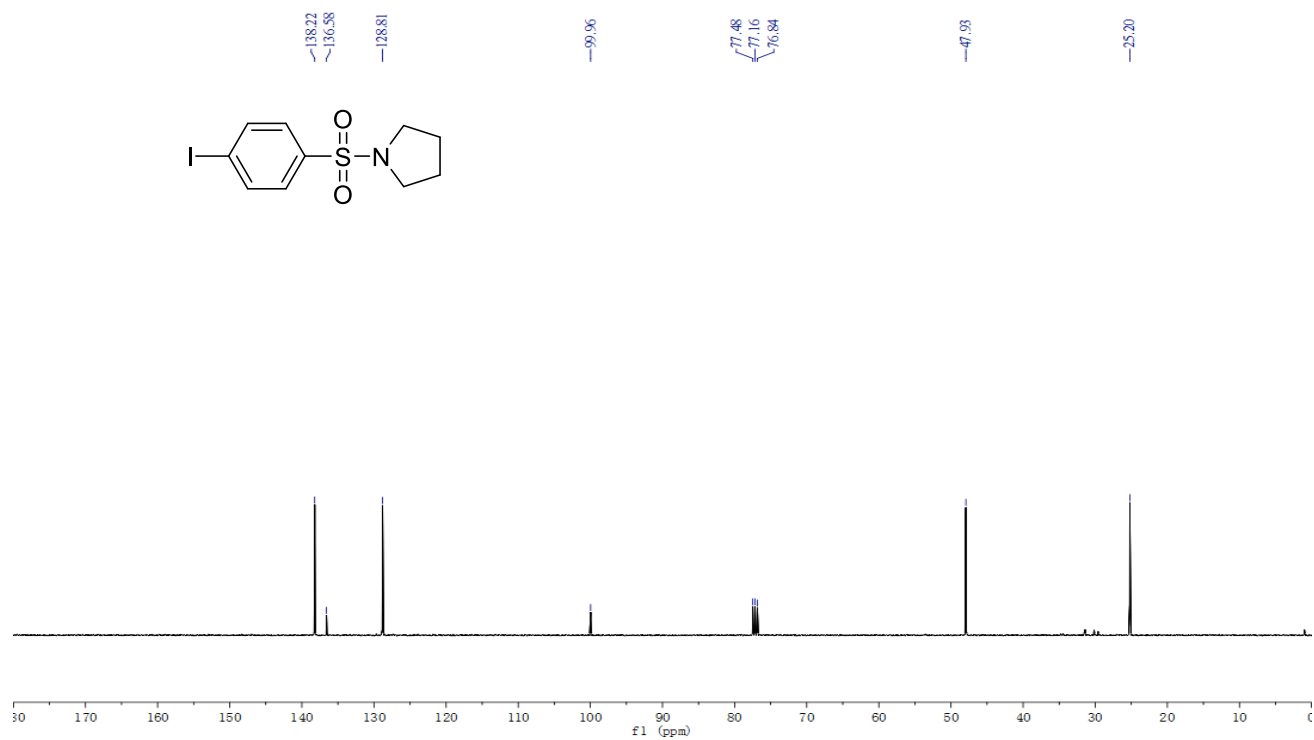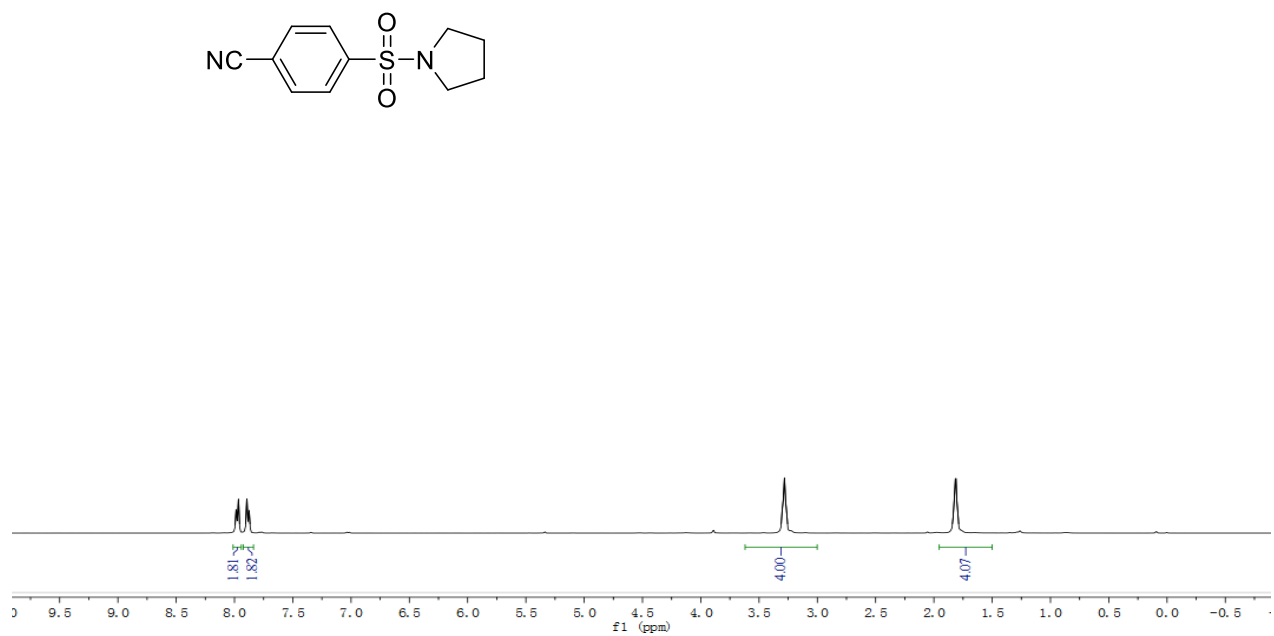

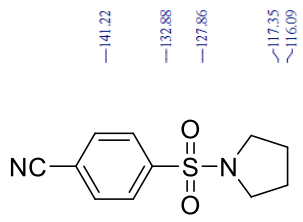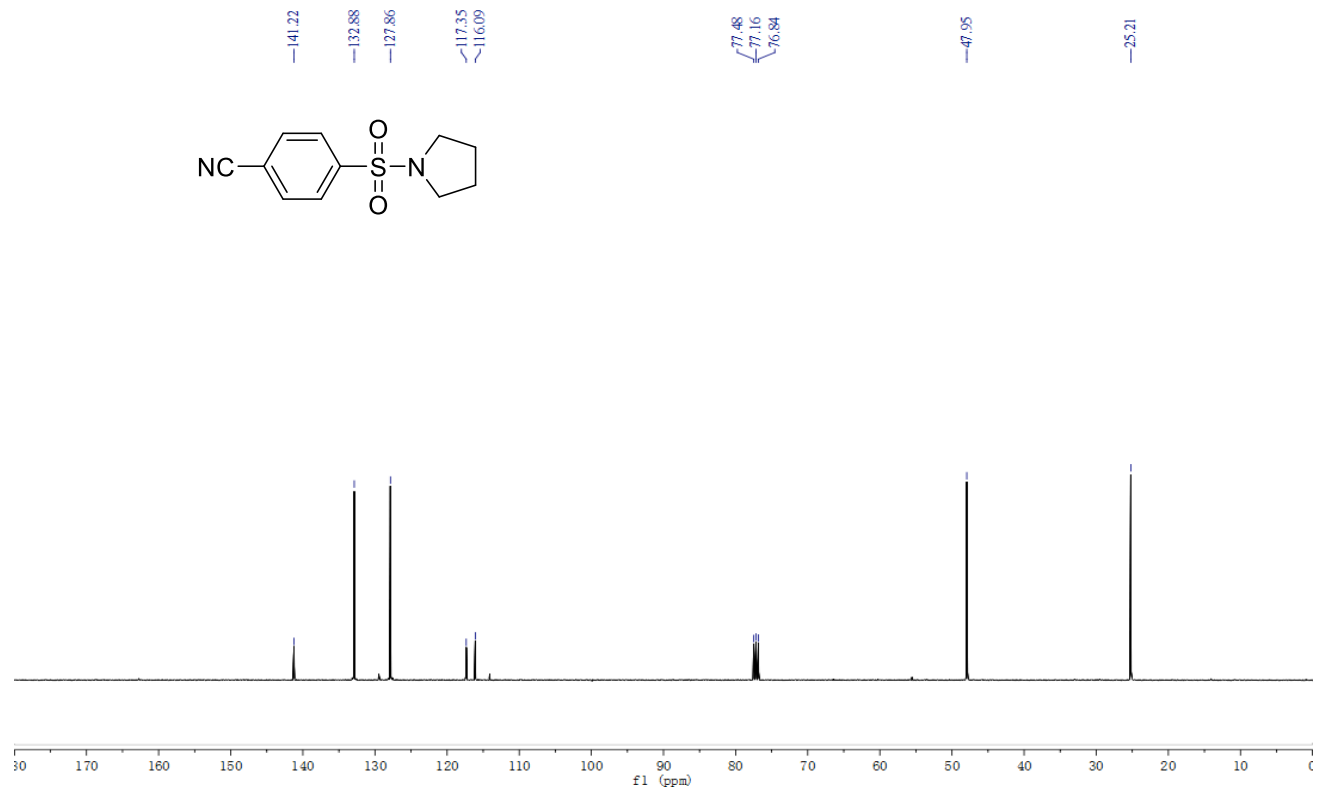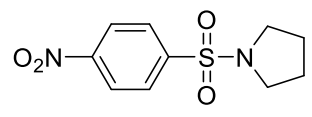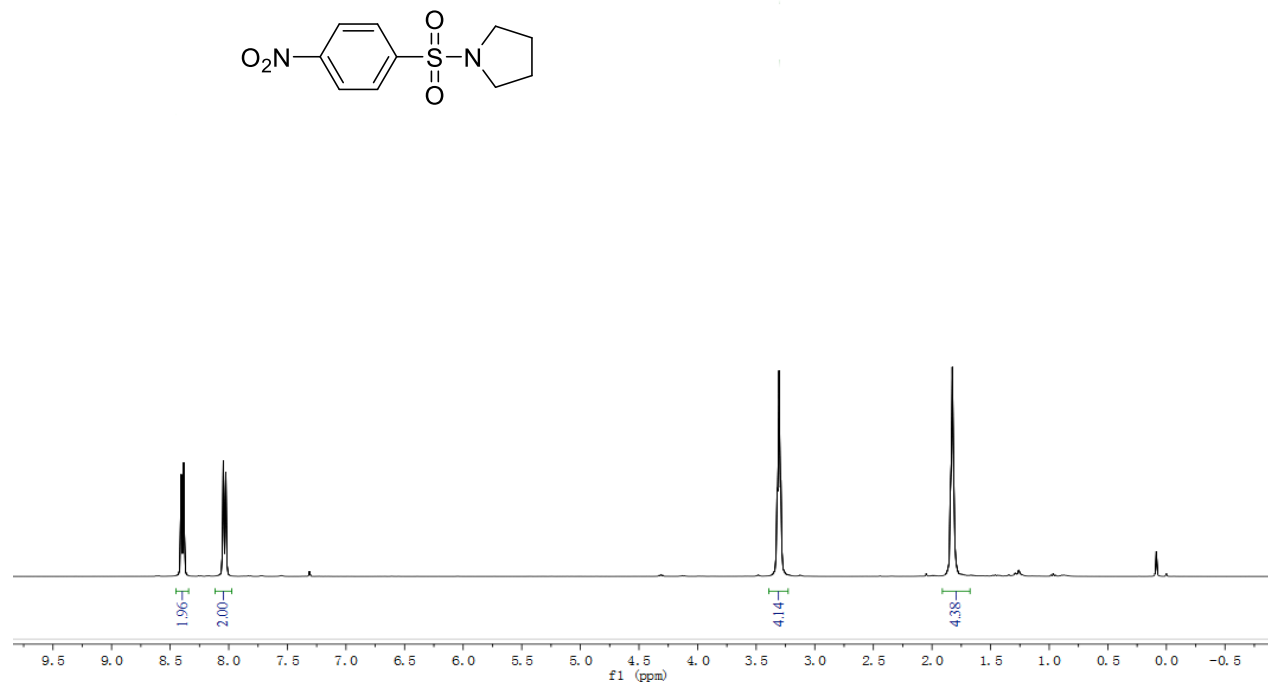

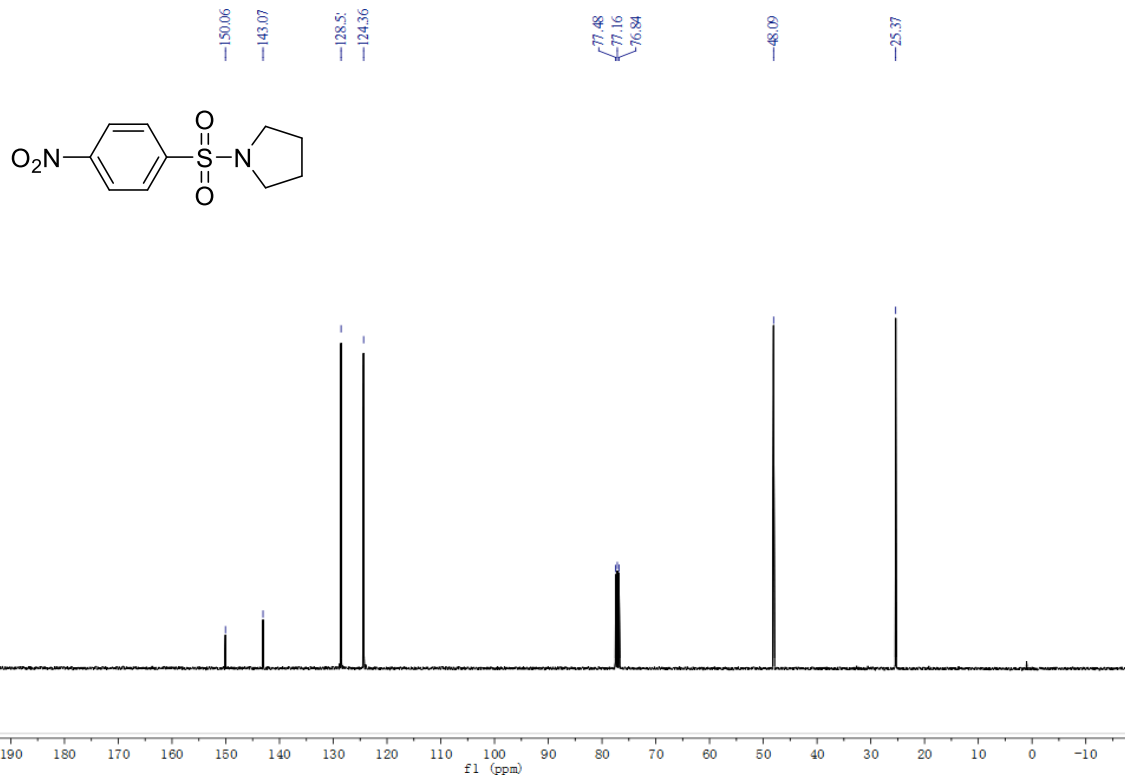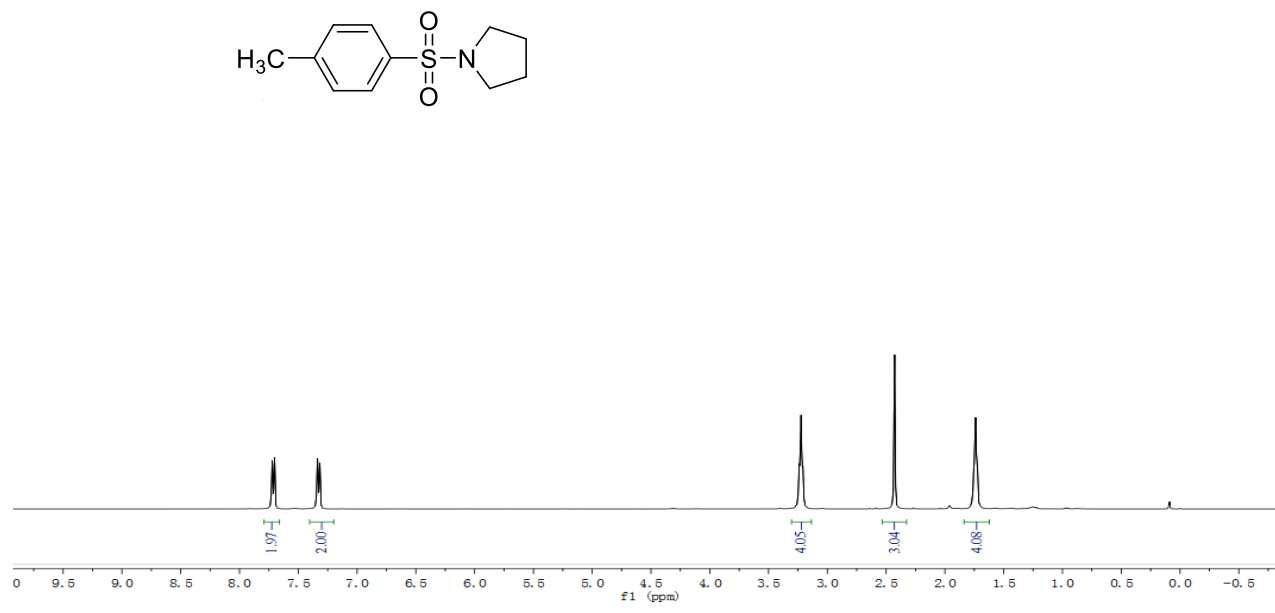

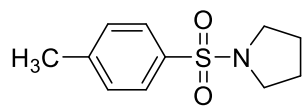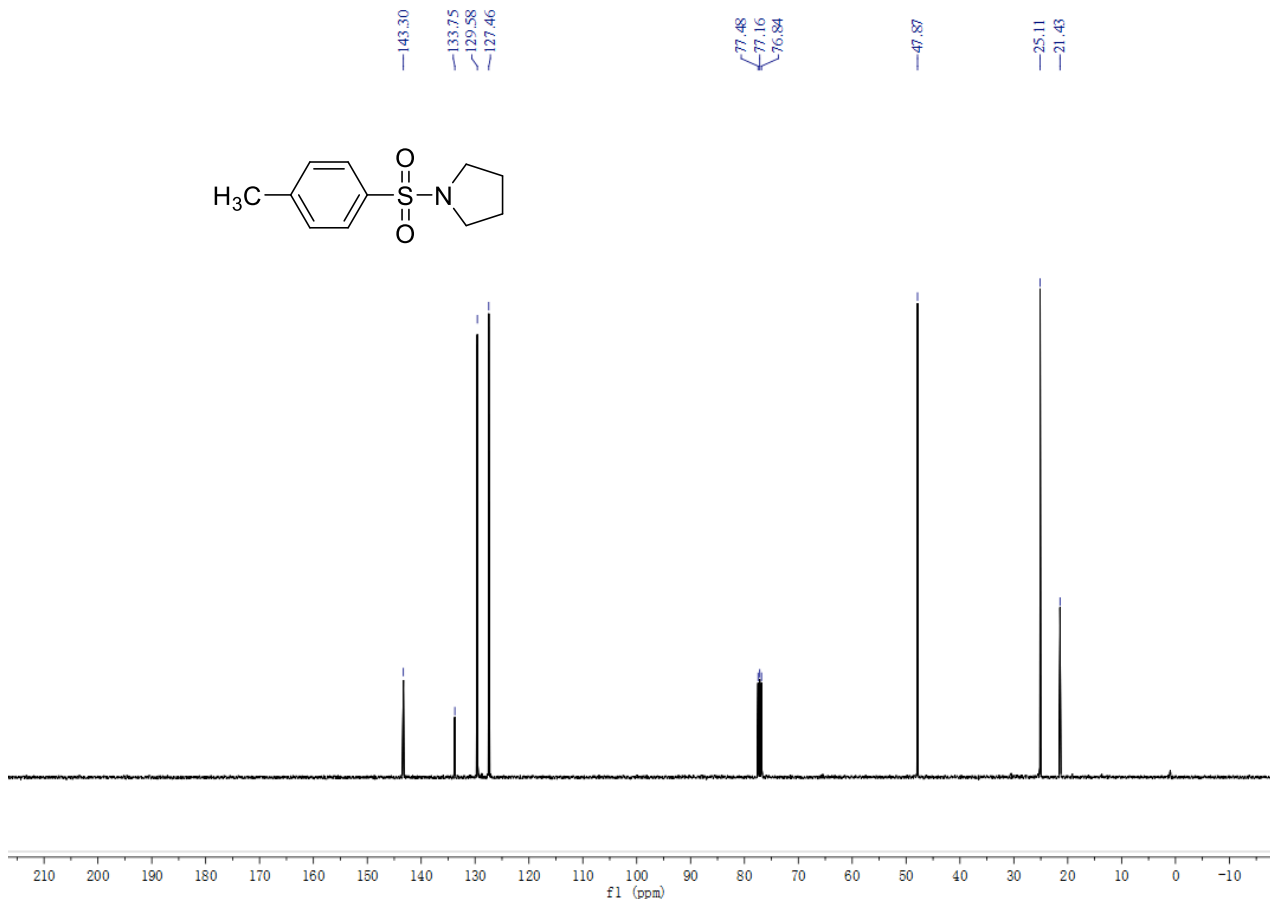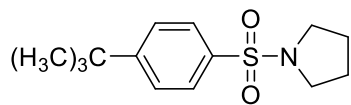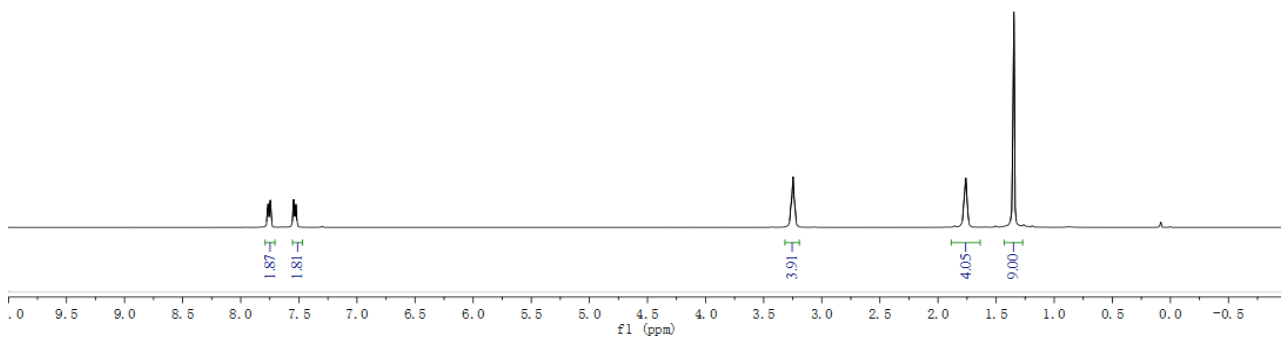

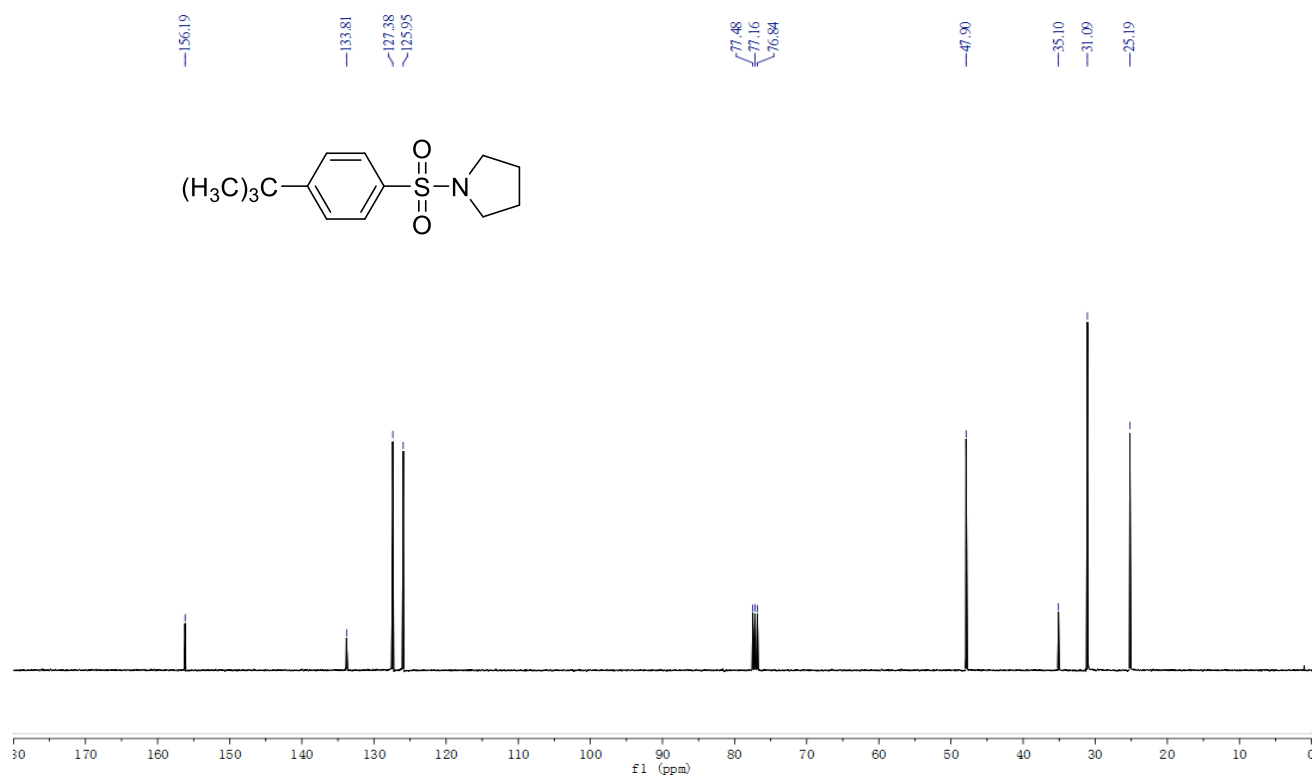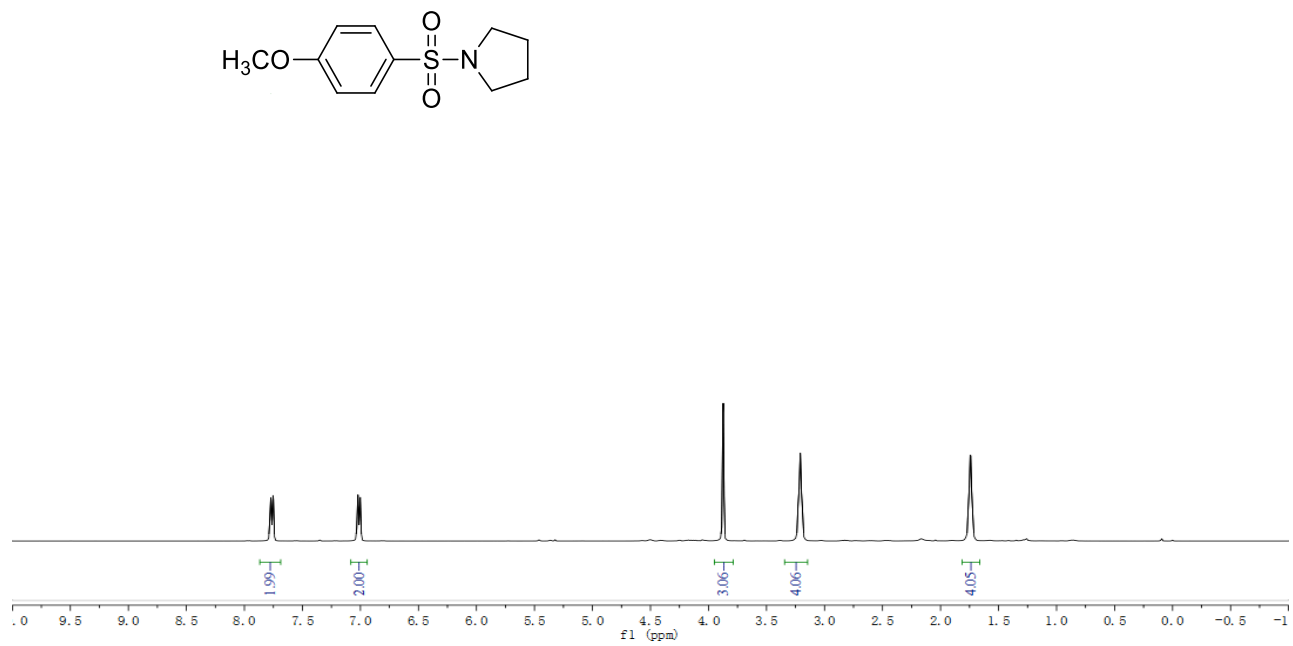

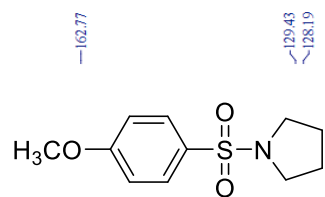

162.77

129.43  
128.19

114.07

77.48  
77.16  
76.84

55.52

47.82

25.01

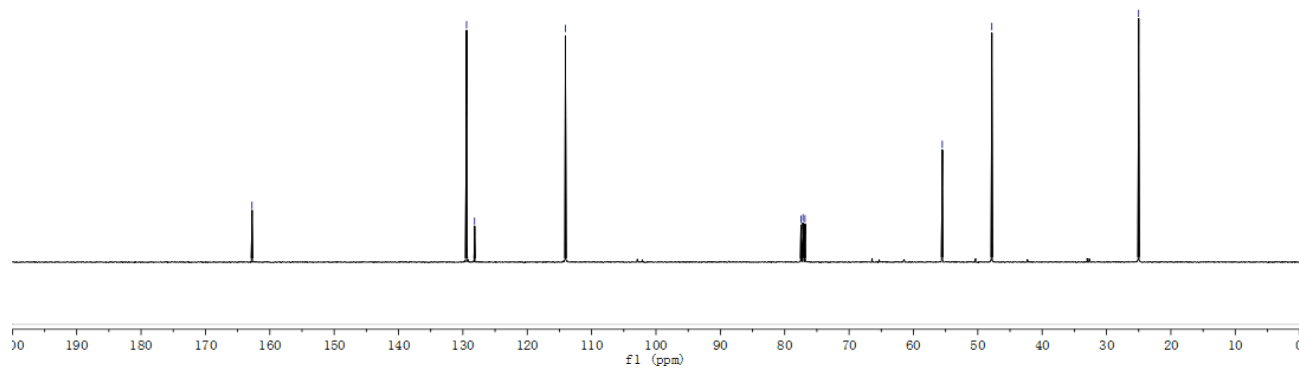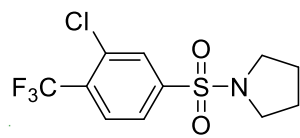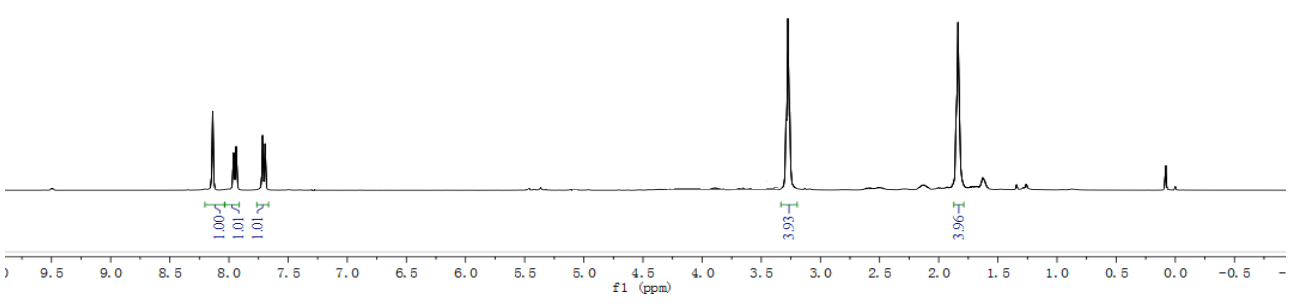

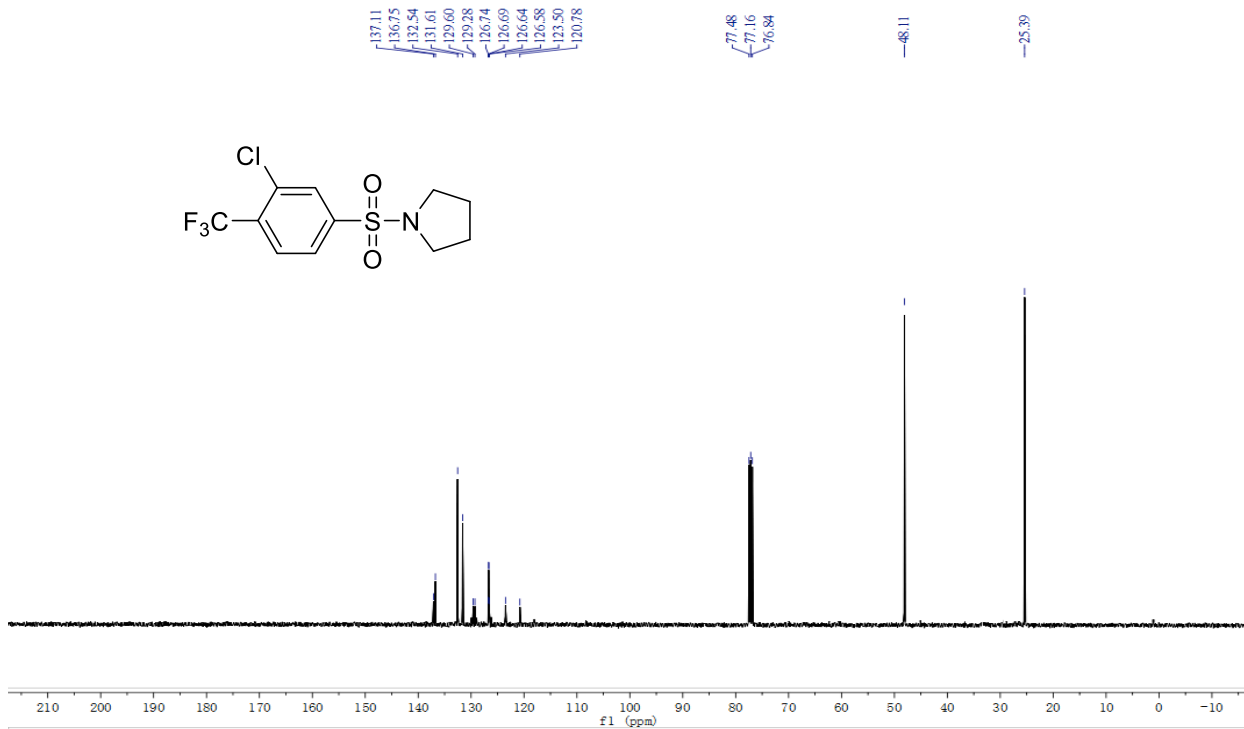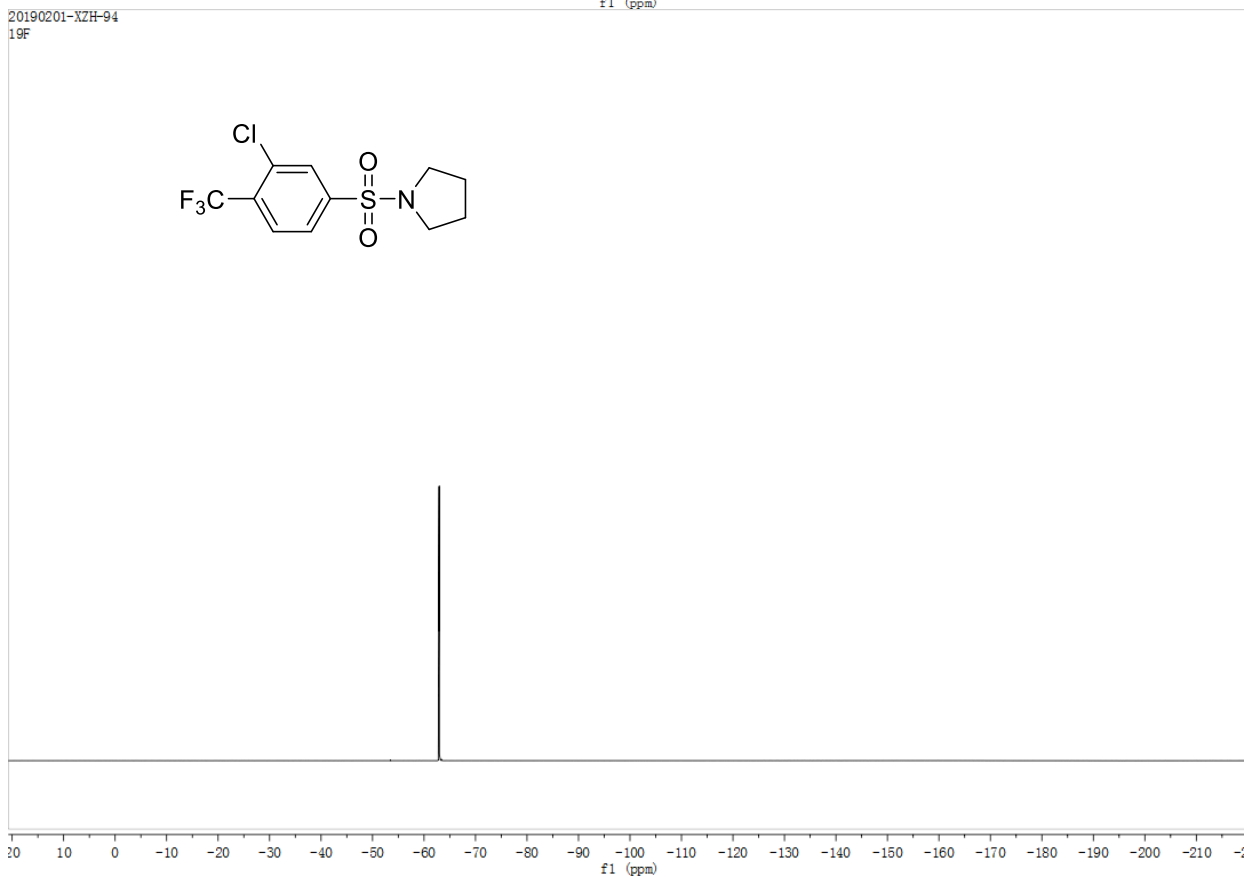



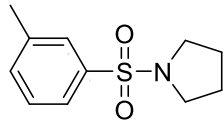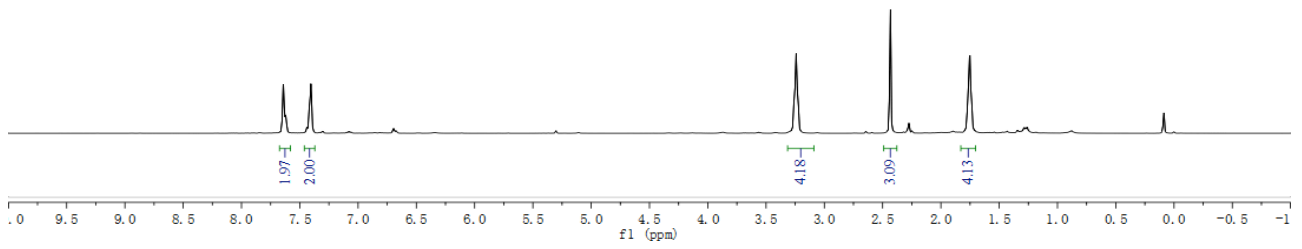

139.14  
136.55  
133.42  
128.87  
127.79  
124.58

77.48  
77.16  
76.84

-47.92

-25.18  
-21.37

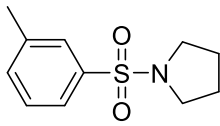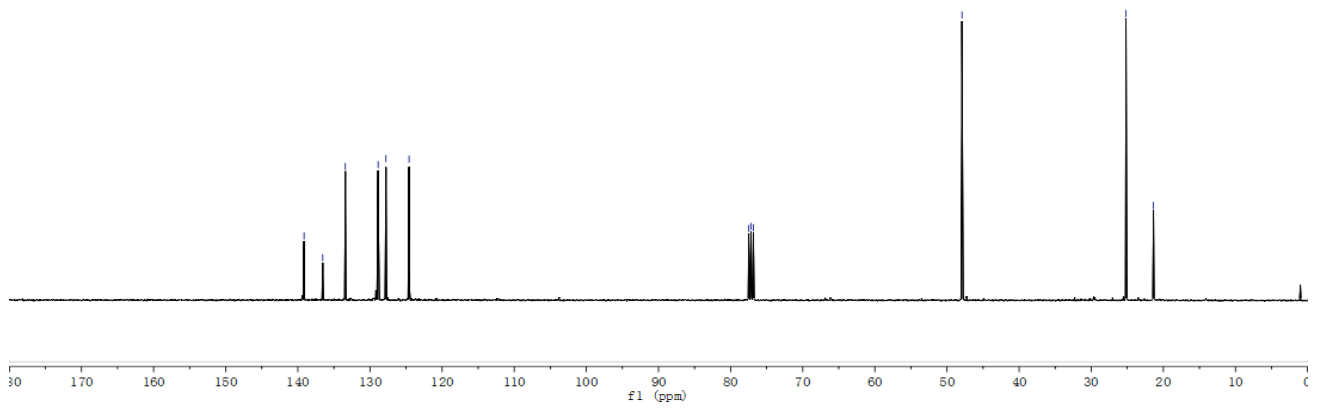

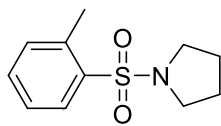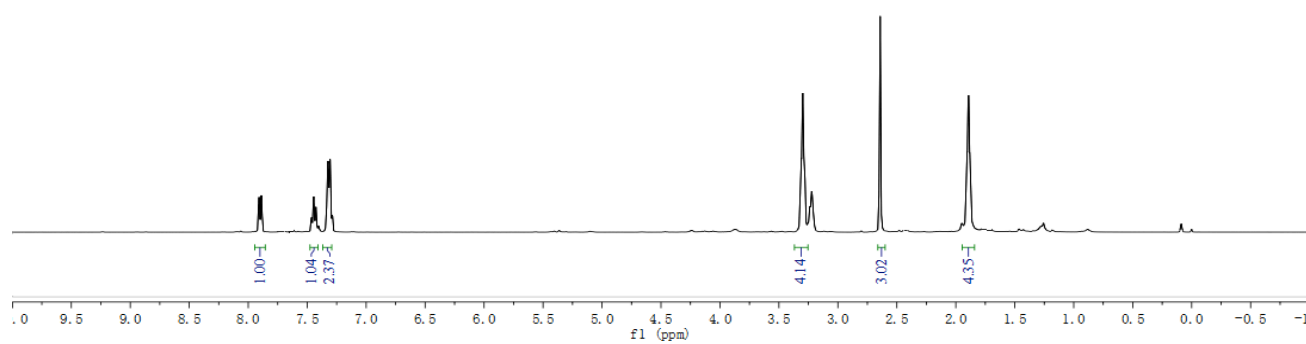

137.80  
137.02  
132.55  
129.38  
127.47  
126.01

77.48  
77.16  
76.84

47.26

25.51  
20.88

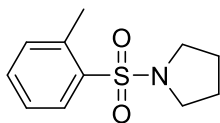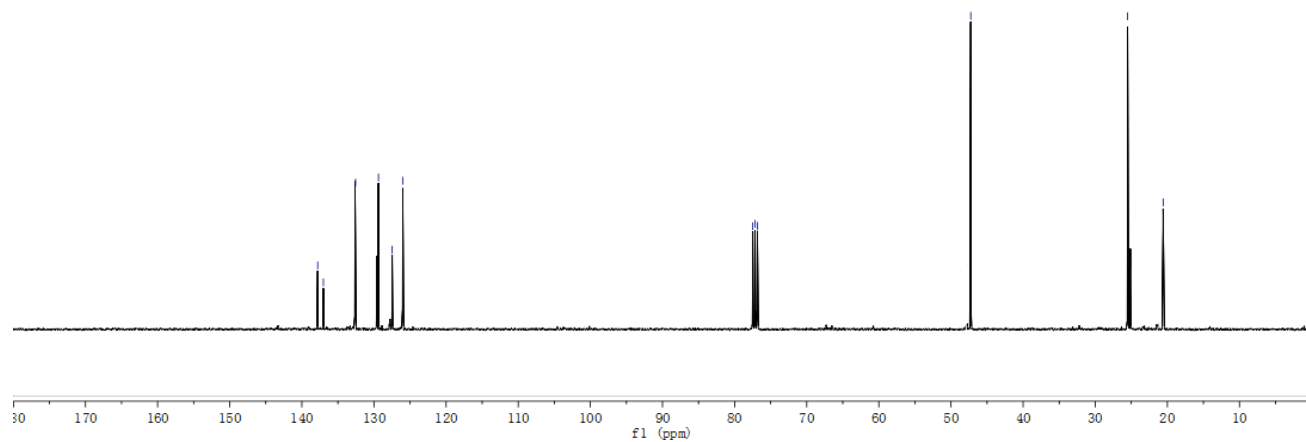

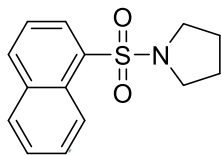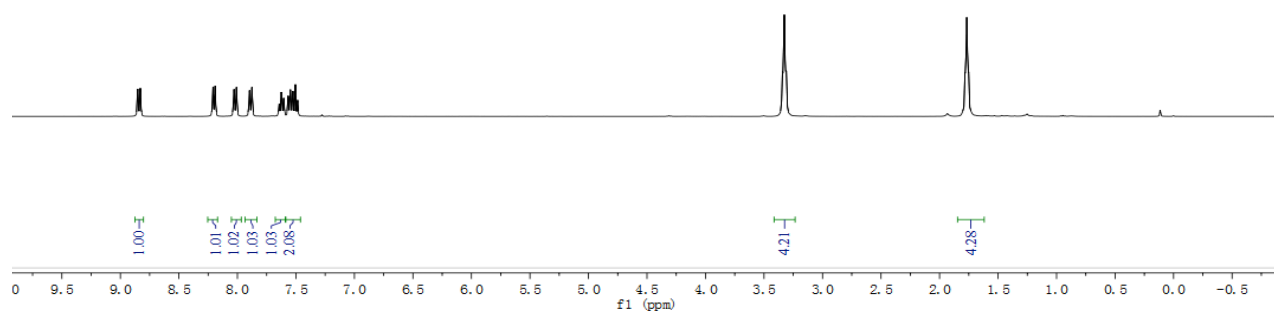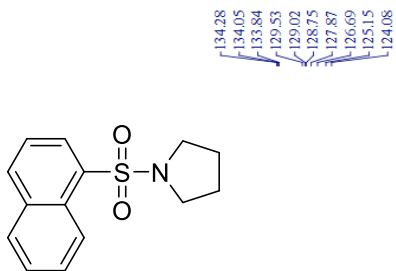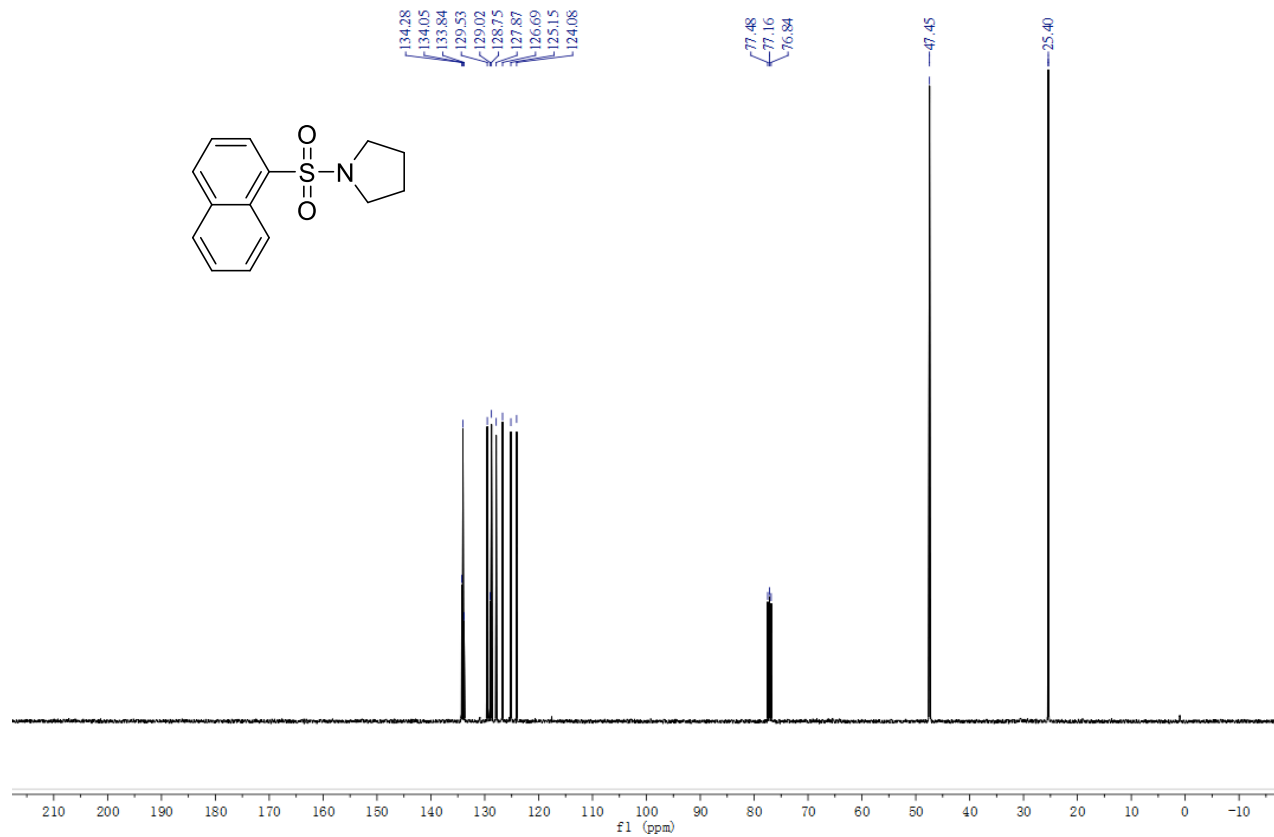

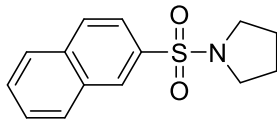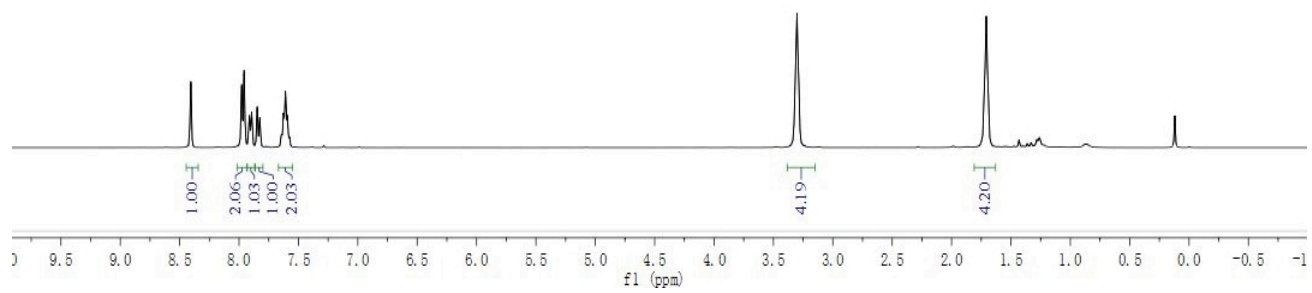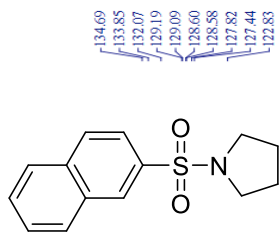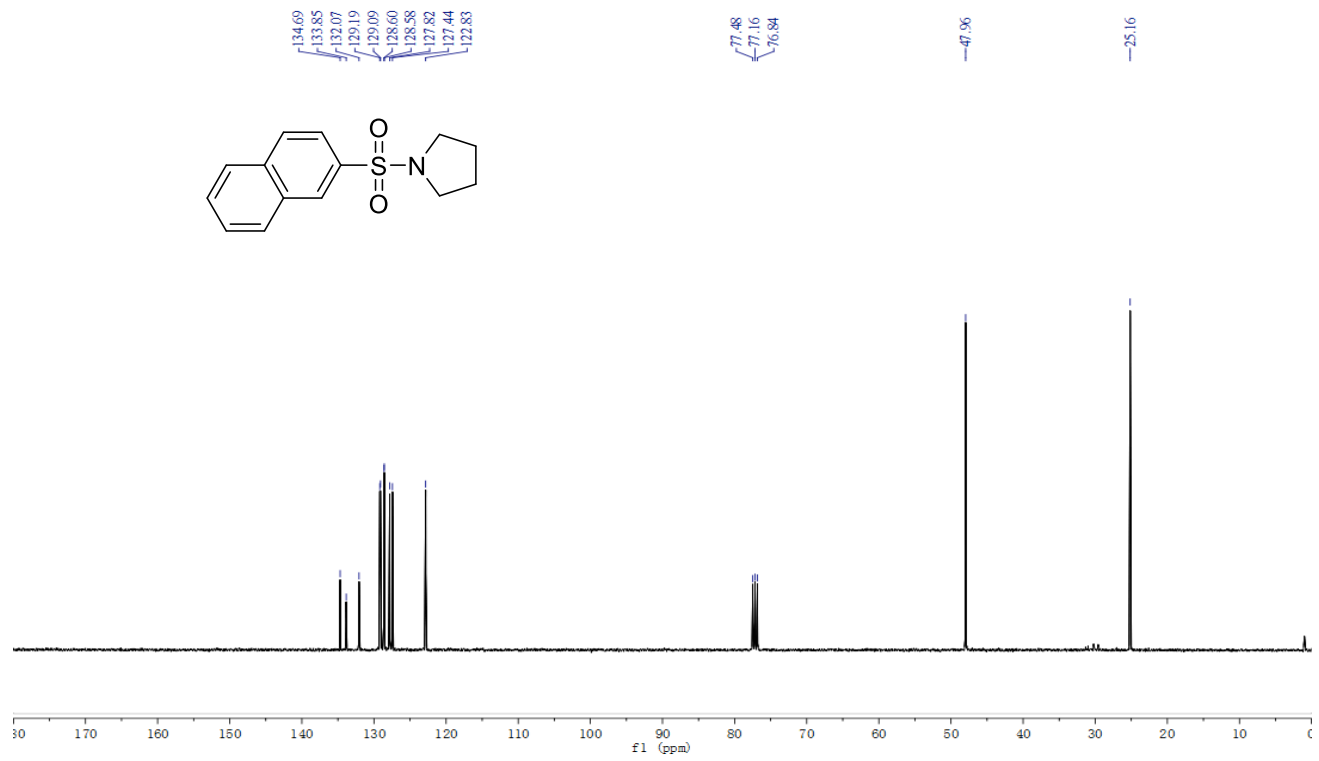

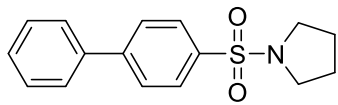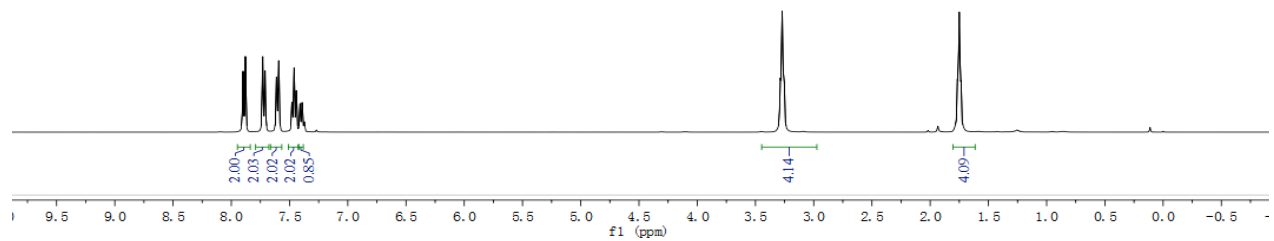

145.28  
139.14  
135.41  
128.98  
128.38  
127.95  
127.50  
127.19

77.48  
77.16  
76.84

47.92

25.15

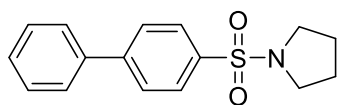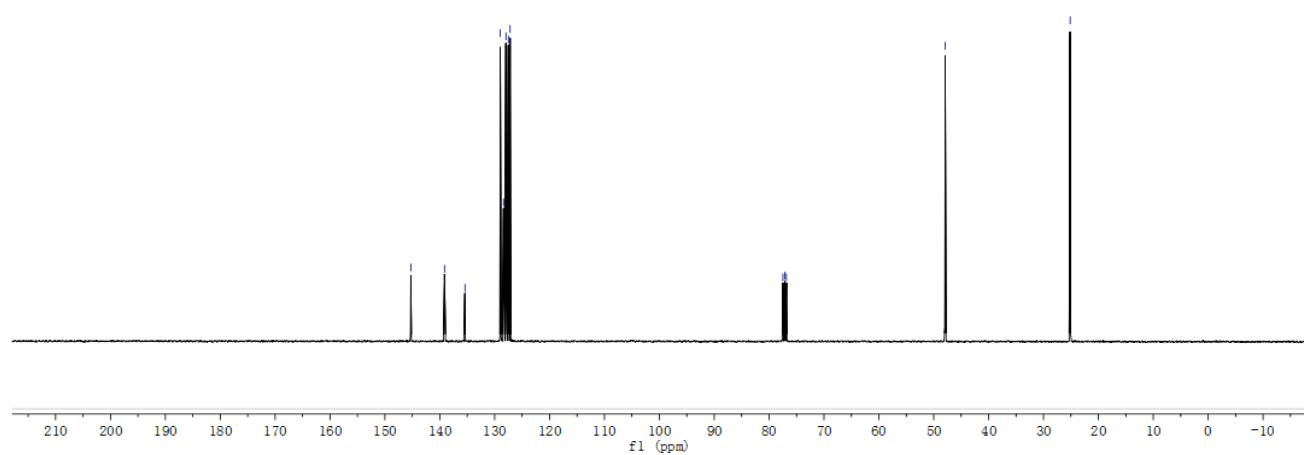

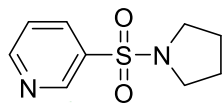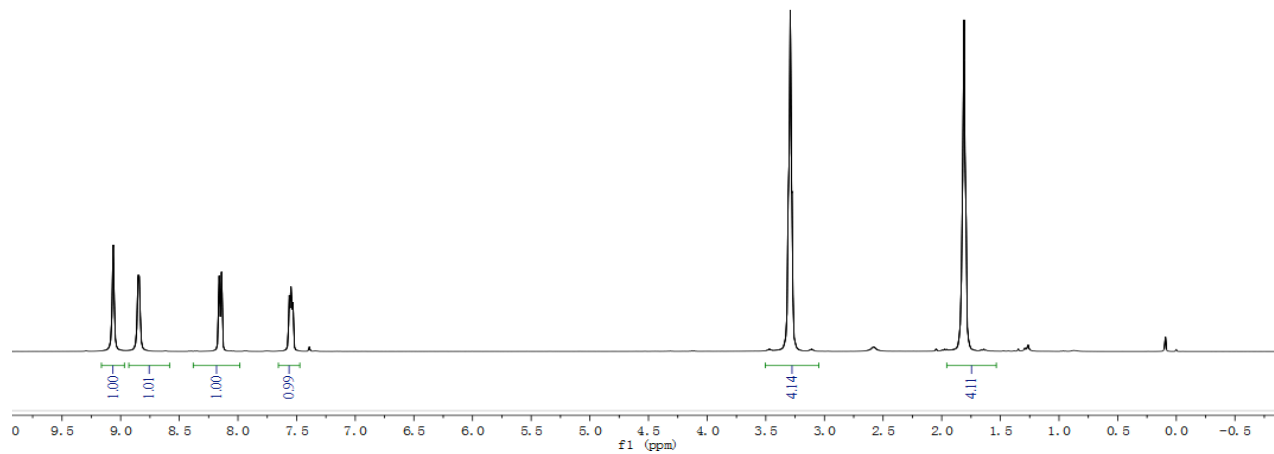

133.06  
147.86  
134.92  
133.60  
123.78  
77.48  
77.16  
76.84  
47.84  
25.13

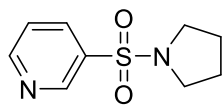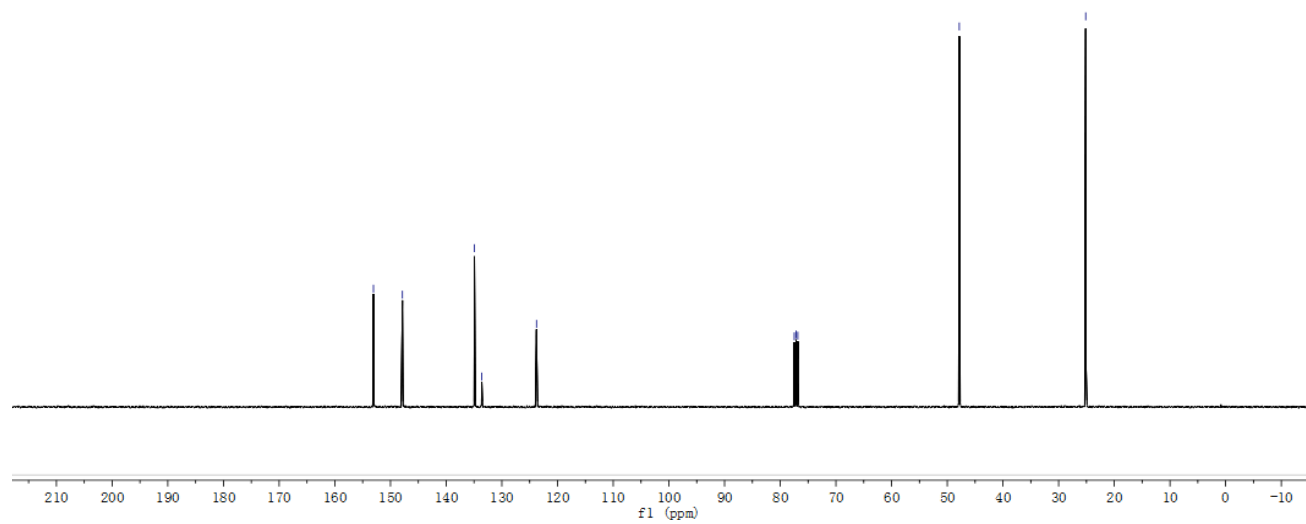

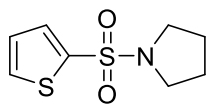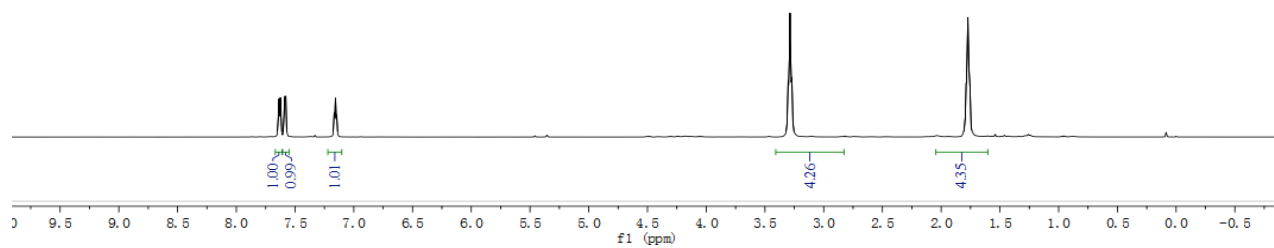

136.59  
131.98  
131.67  
127.45

77.48  
77.16  
76.84

48.15

25.20

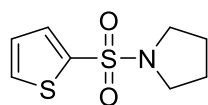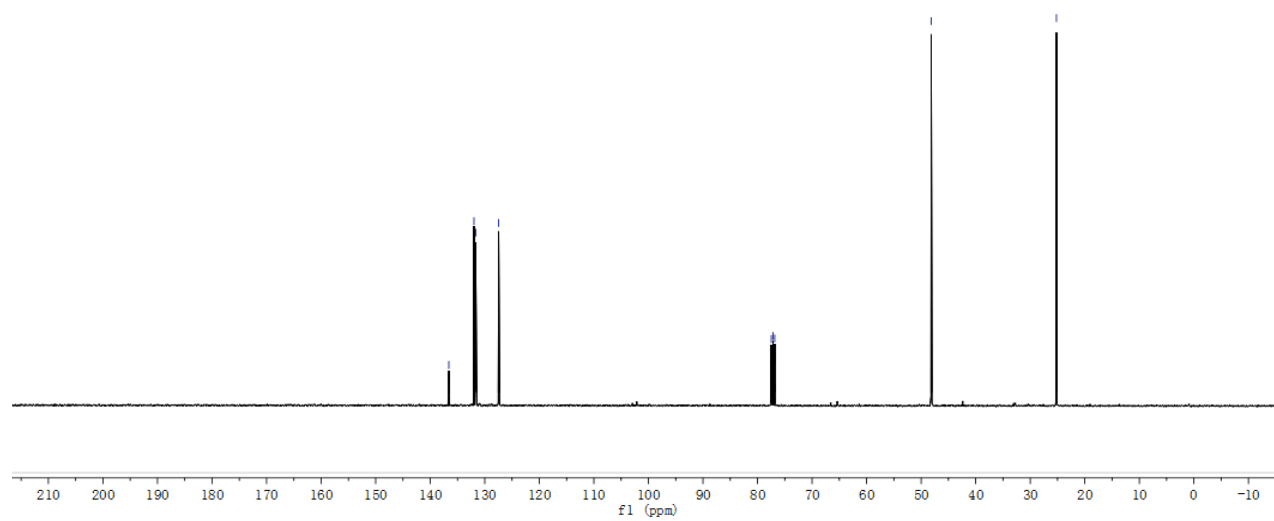

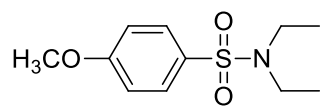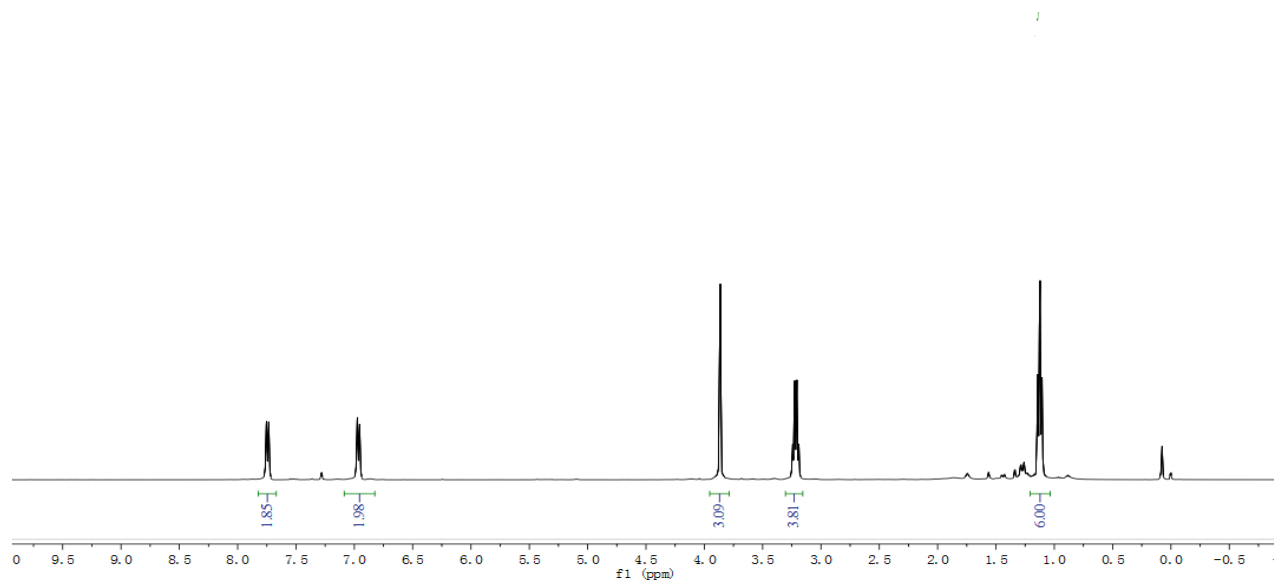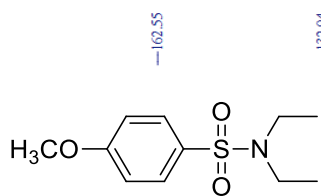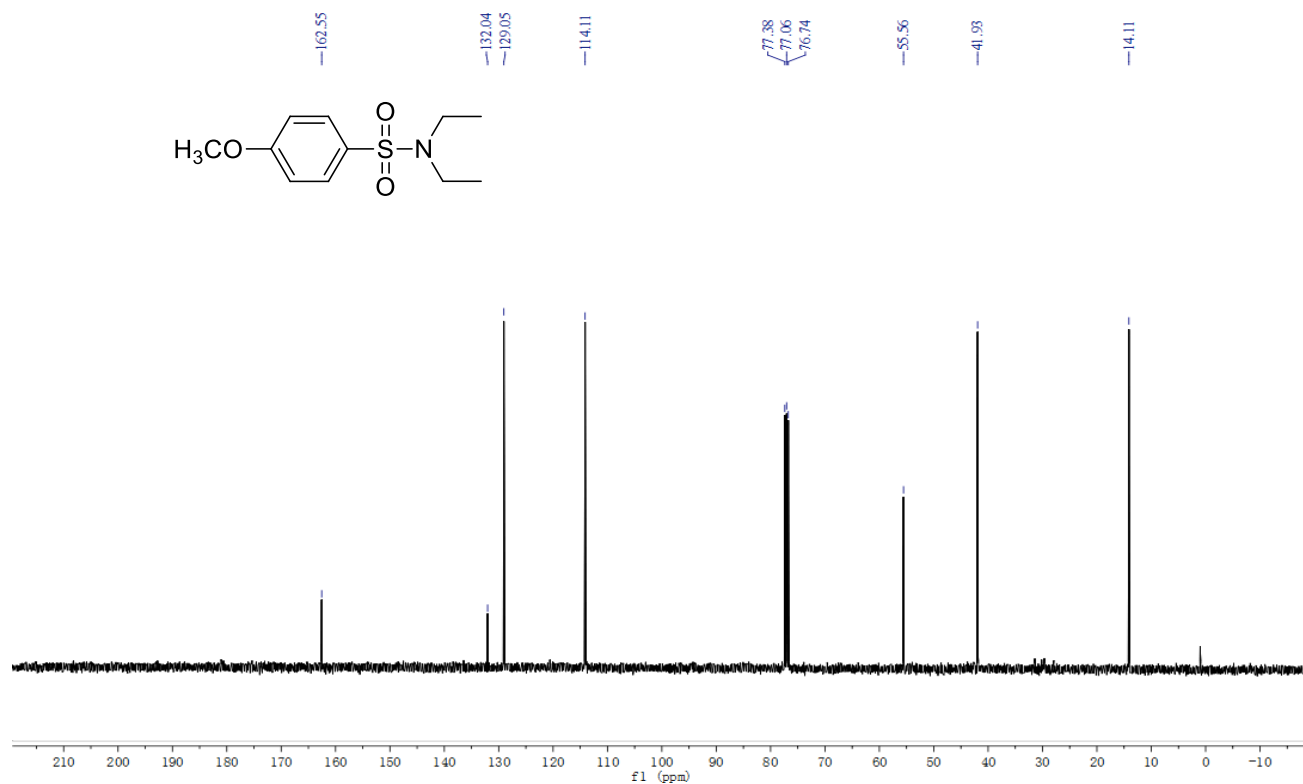



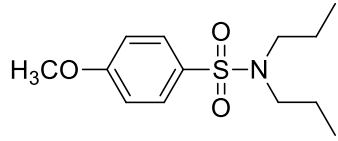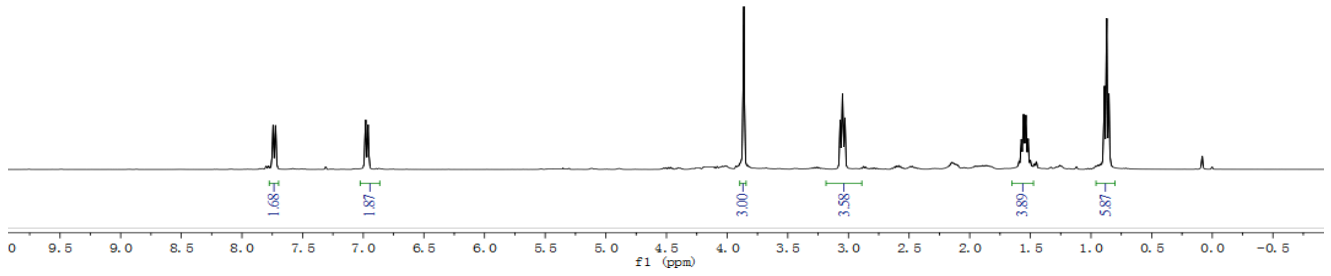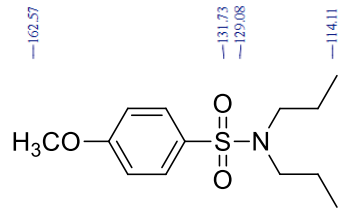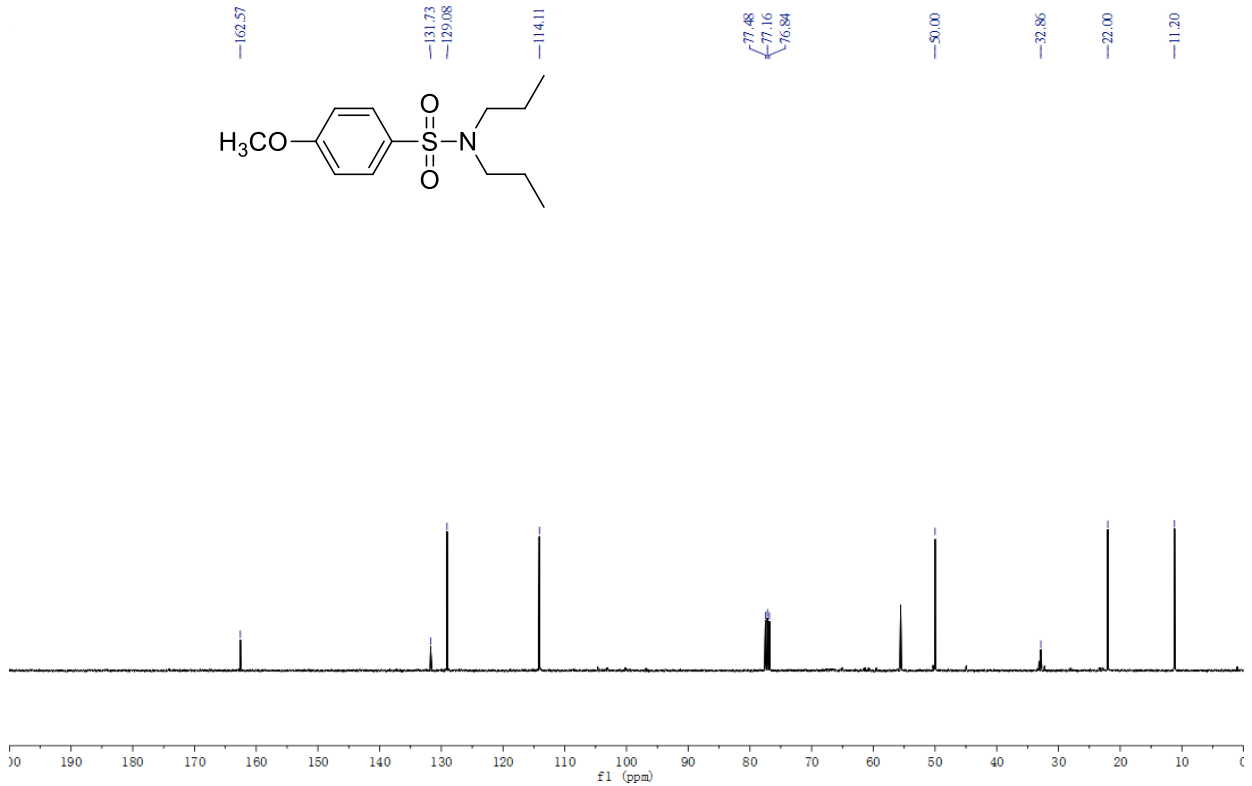

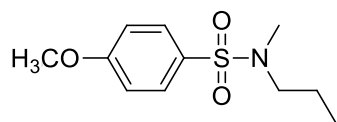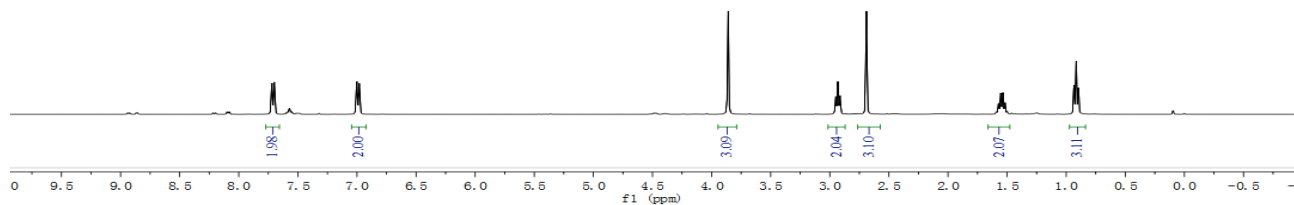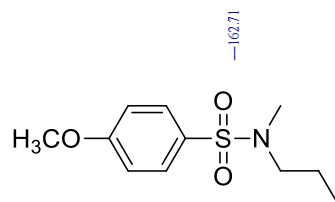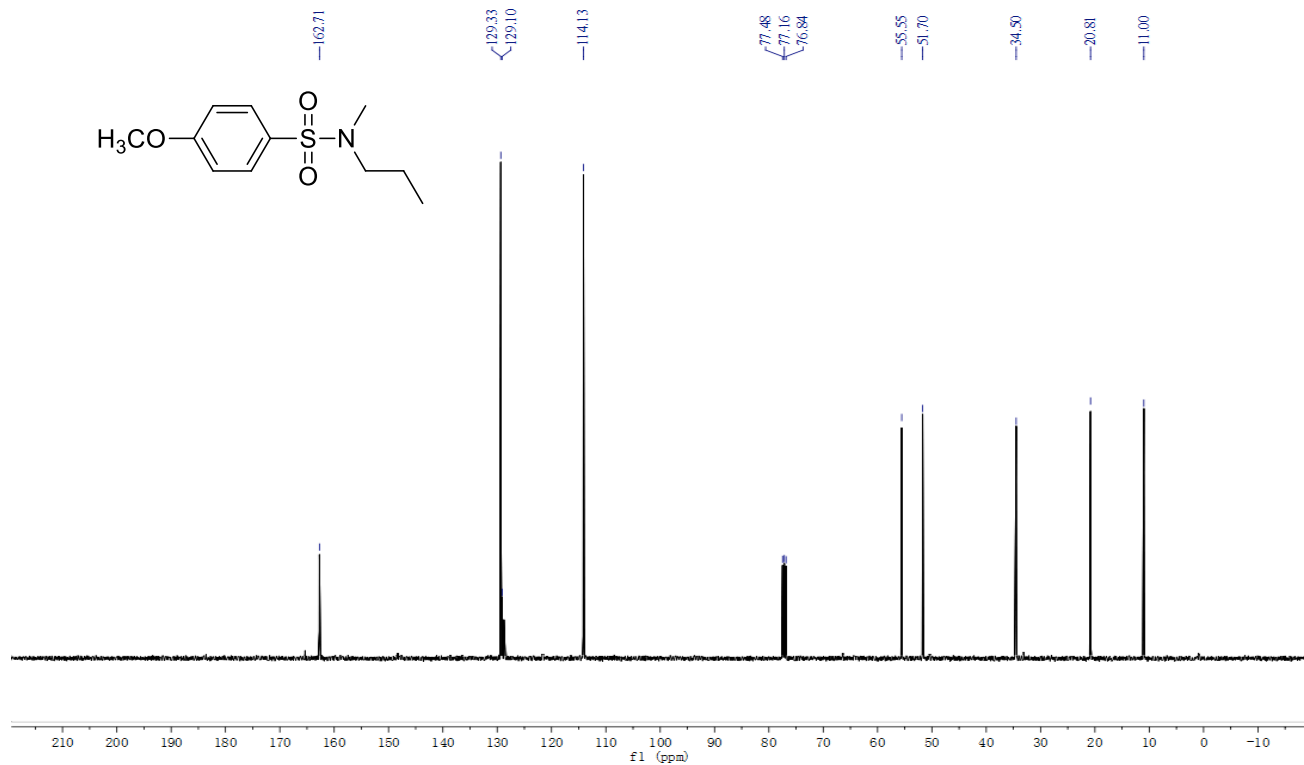

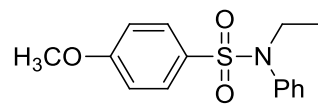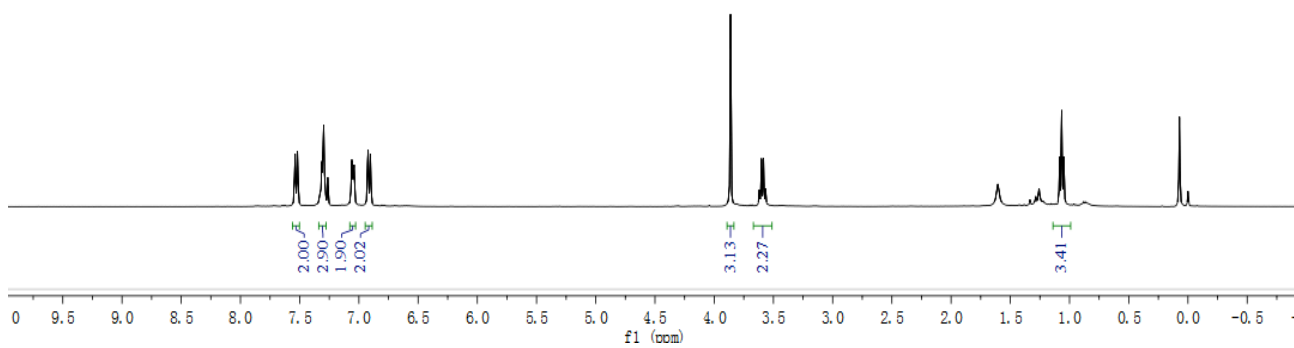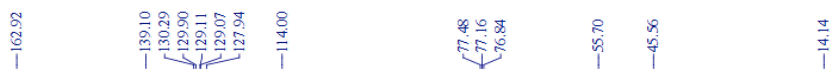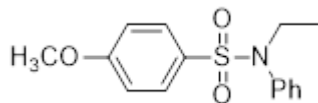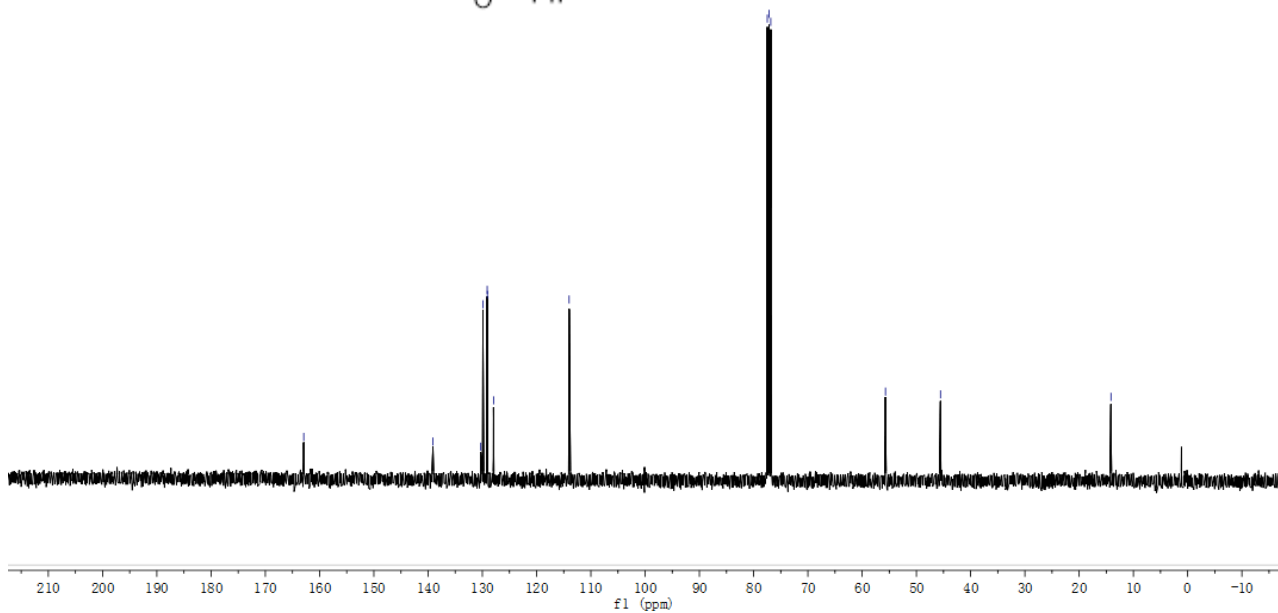

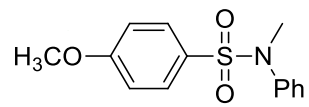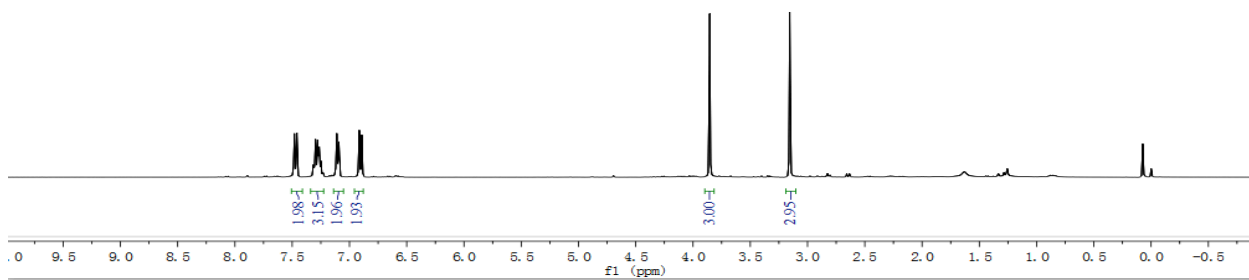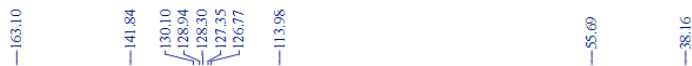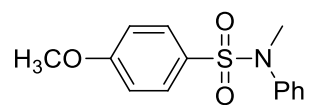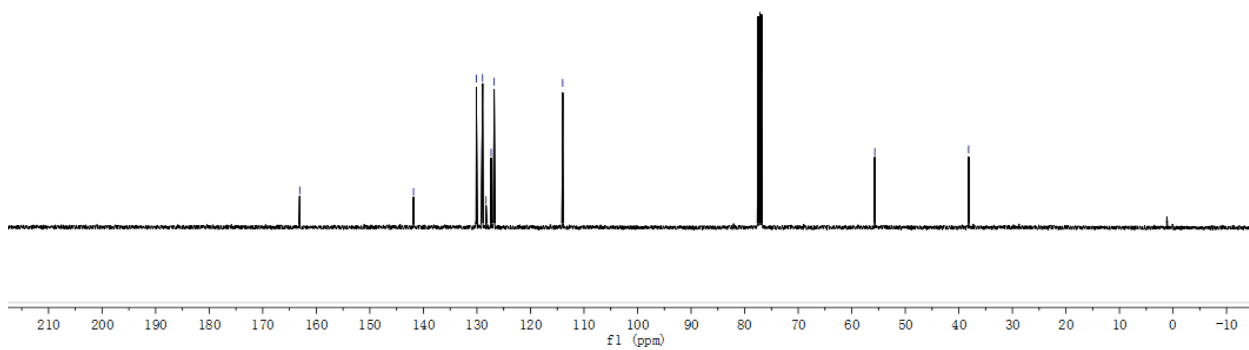

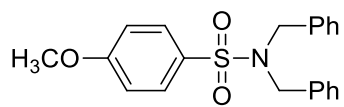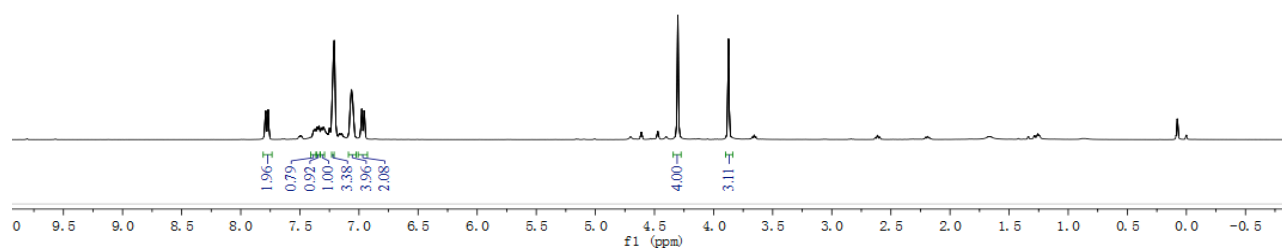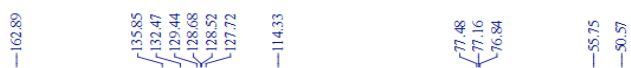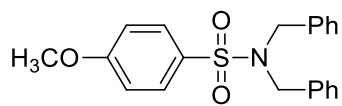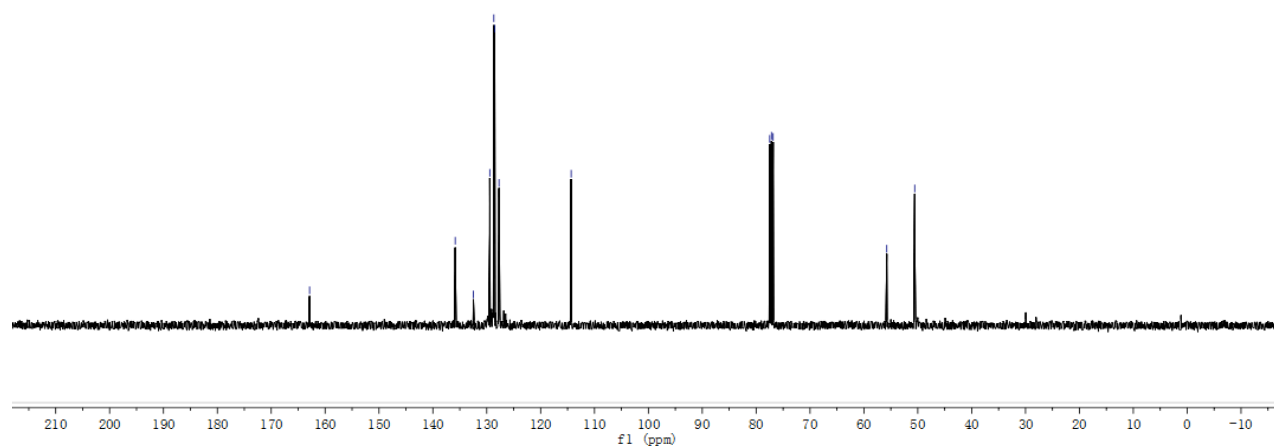

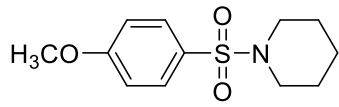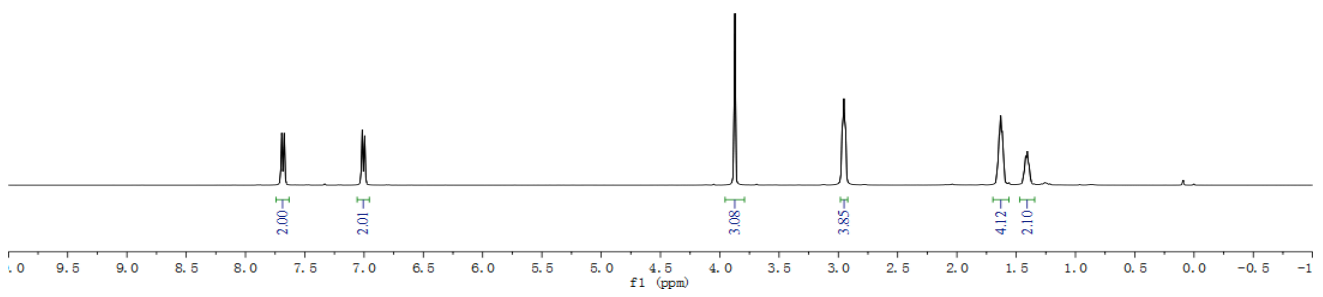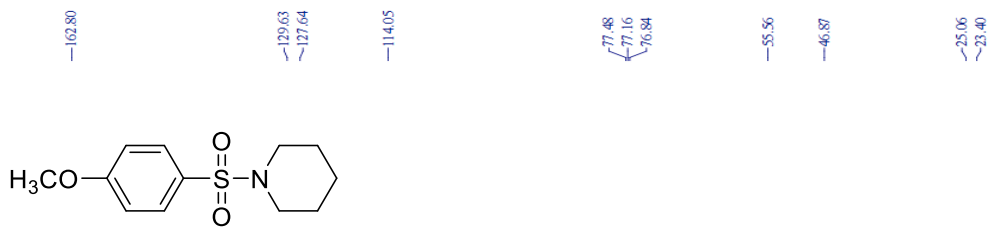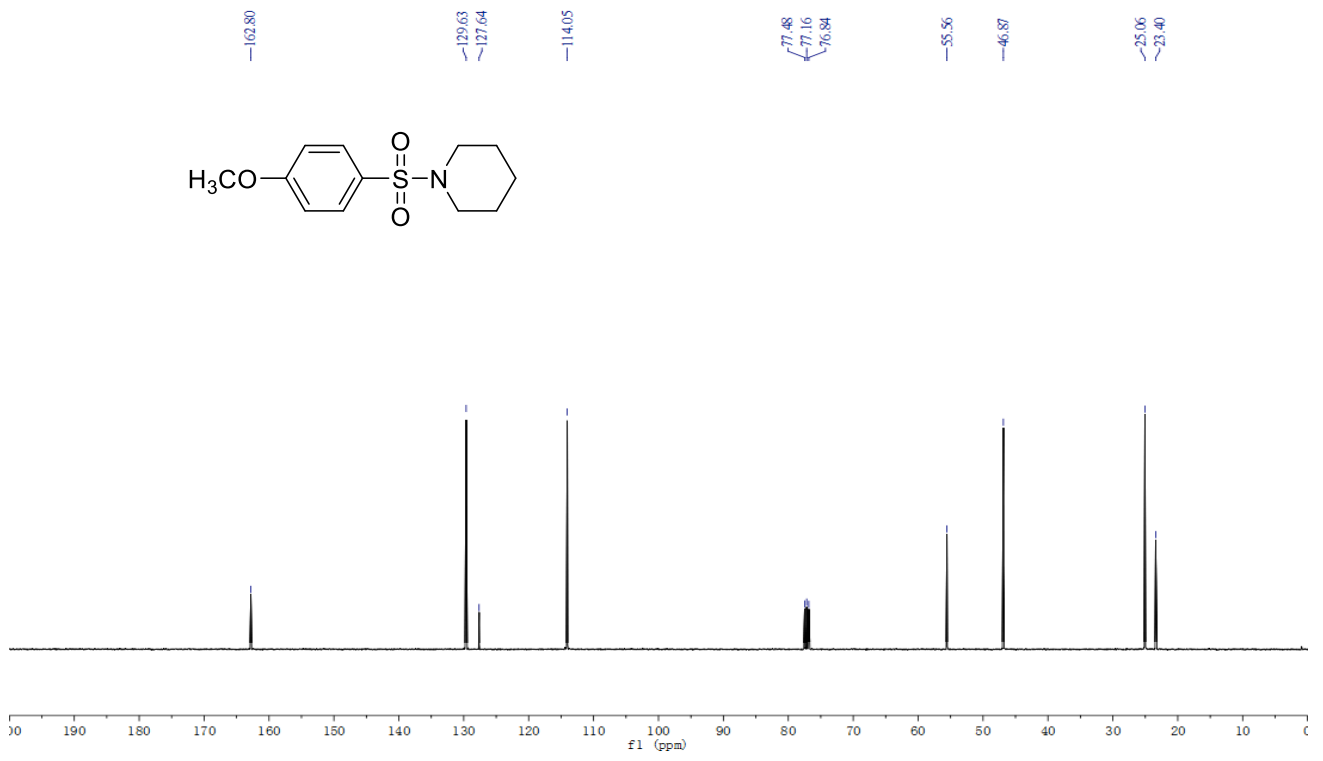

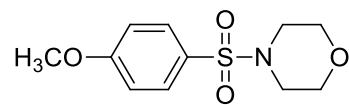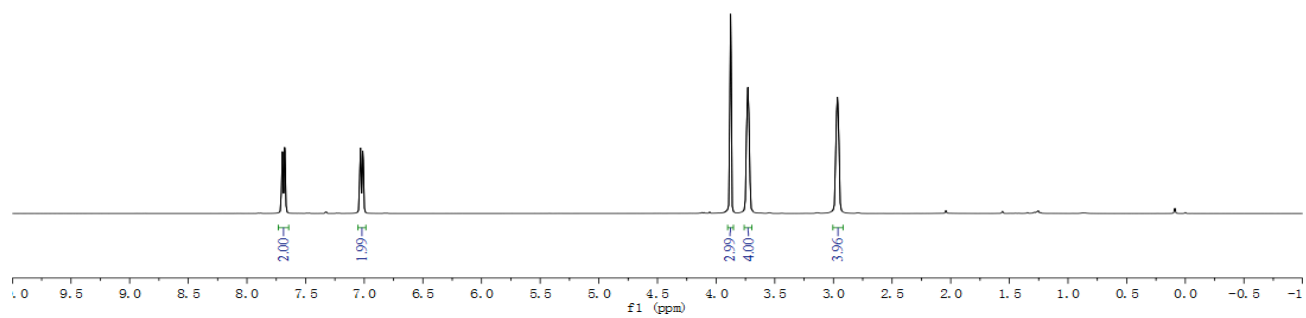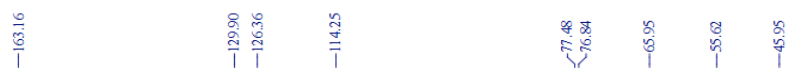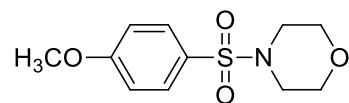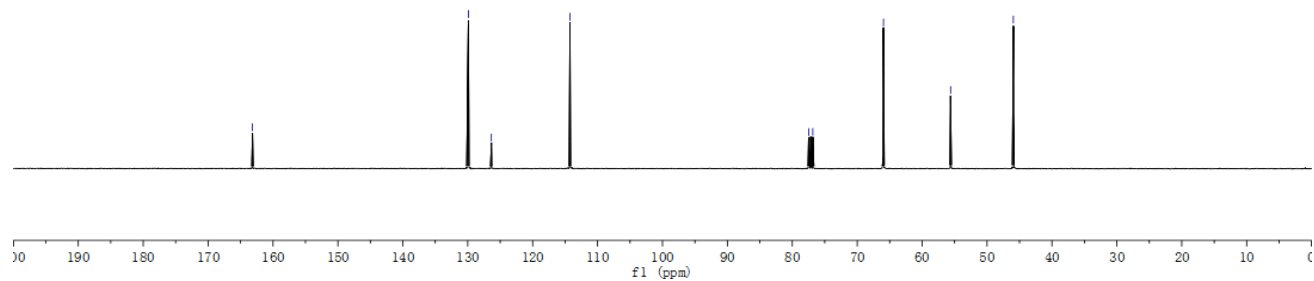

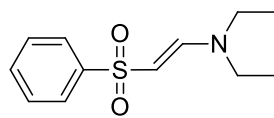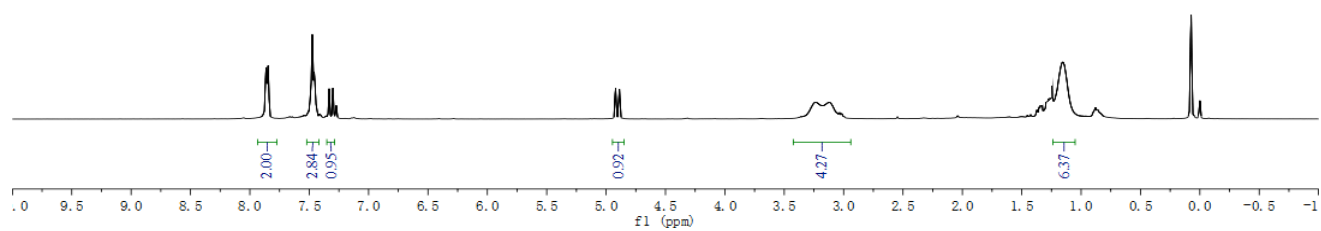

149.15  
145.43  
131.57  
128.90  
126.18  
91.34  
77.48  
77.16  
76.84  
50.21  
42.53  
14.64  
11.24

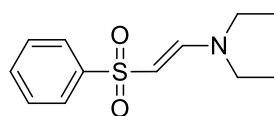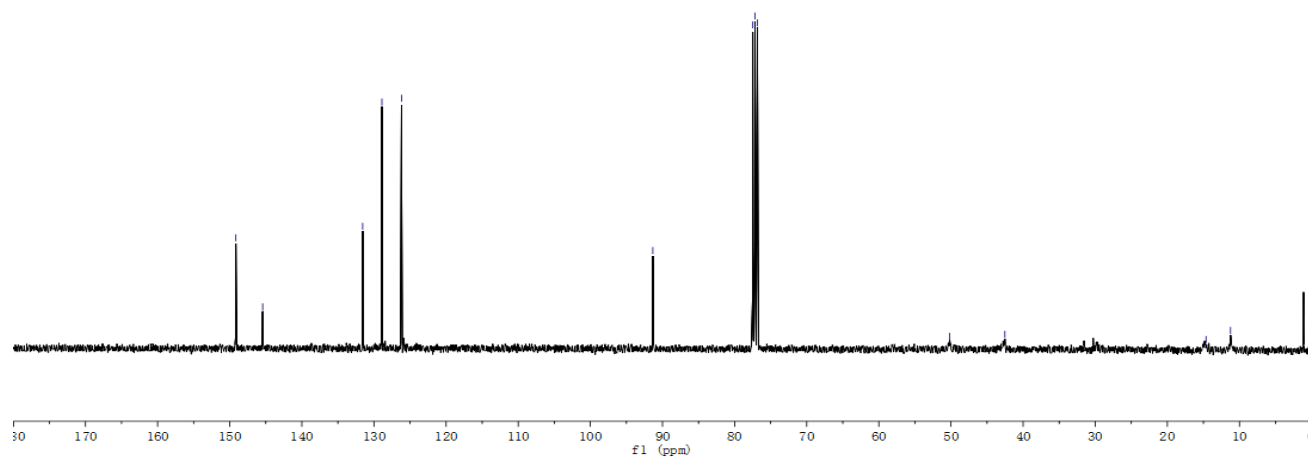



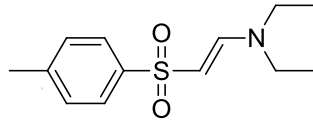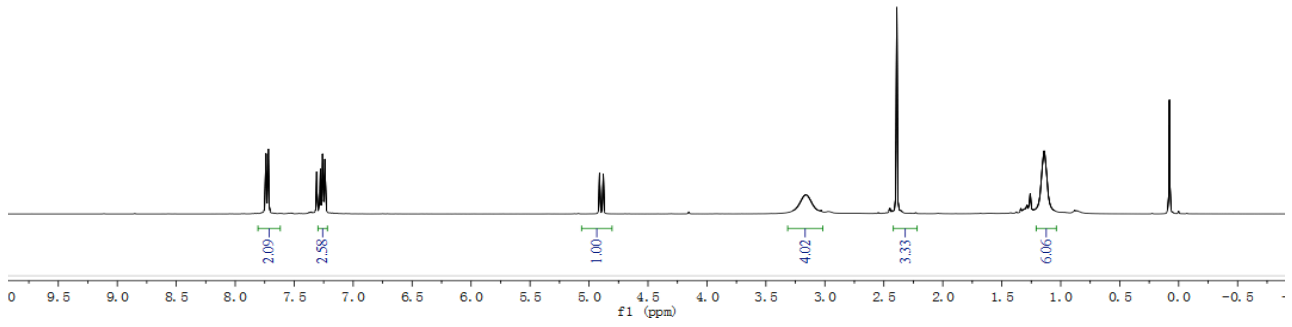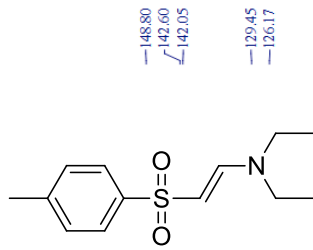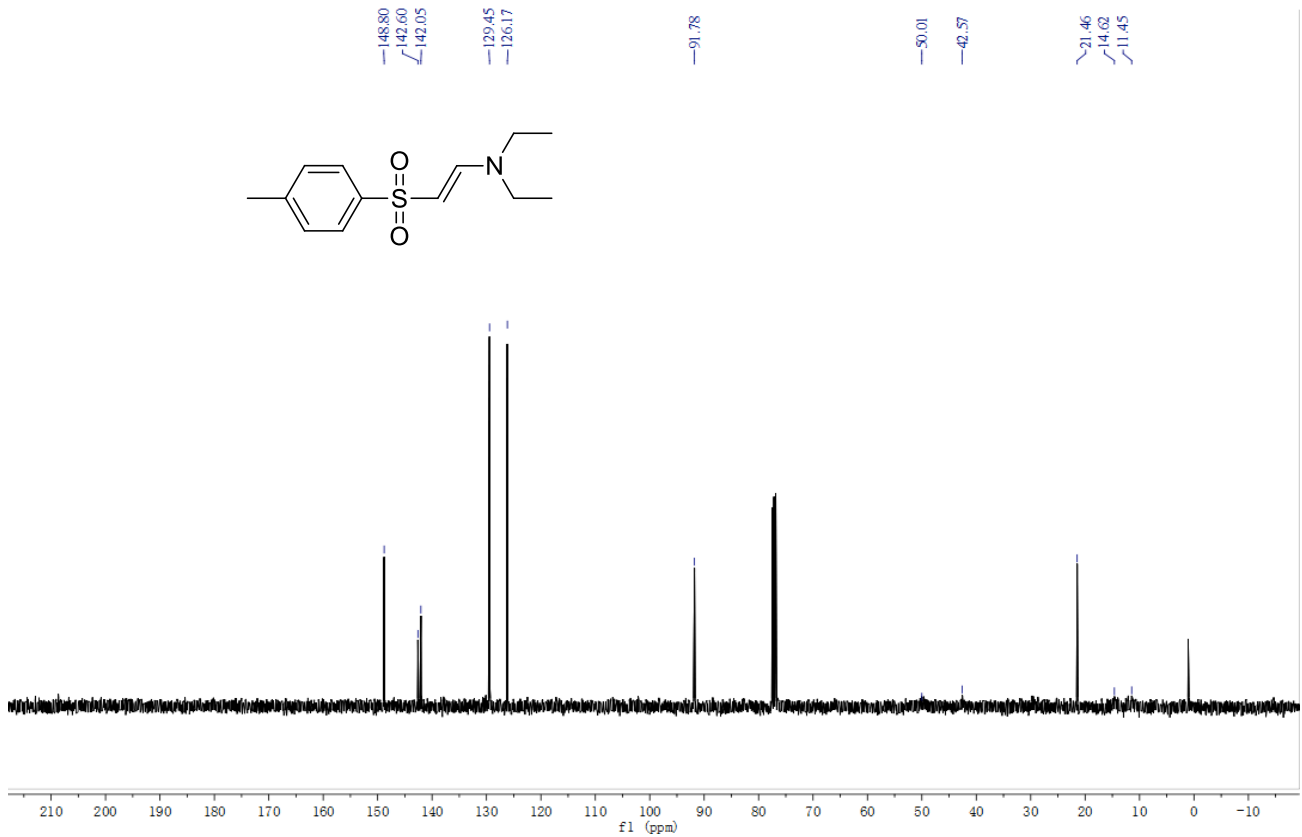

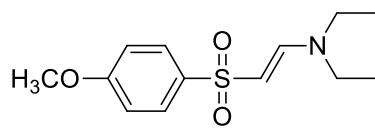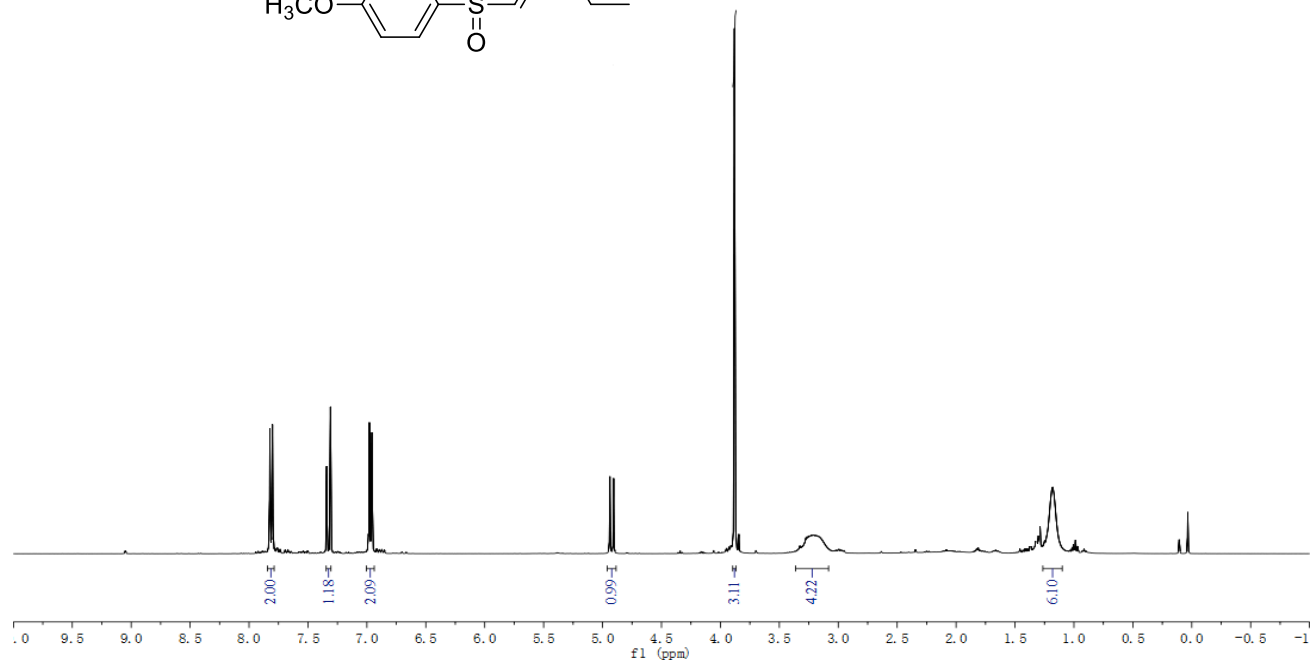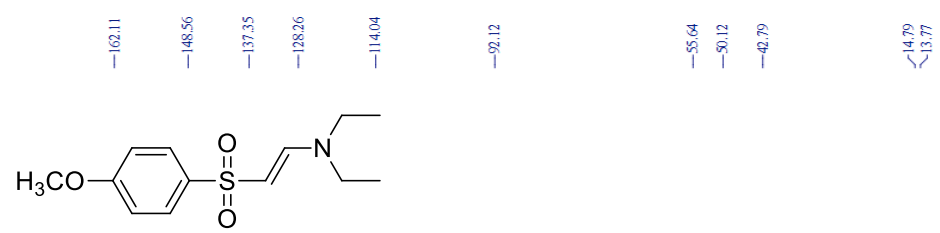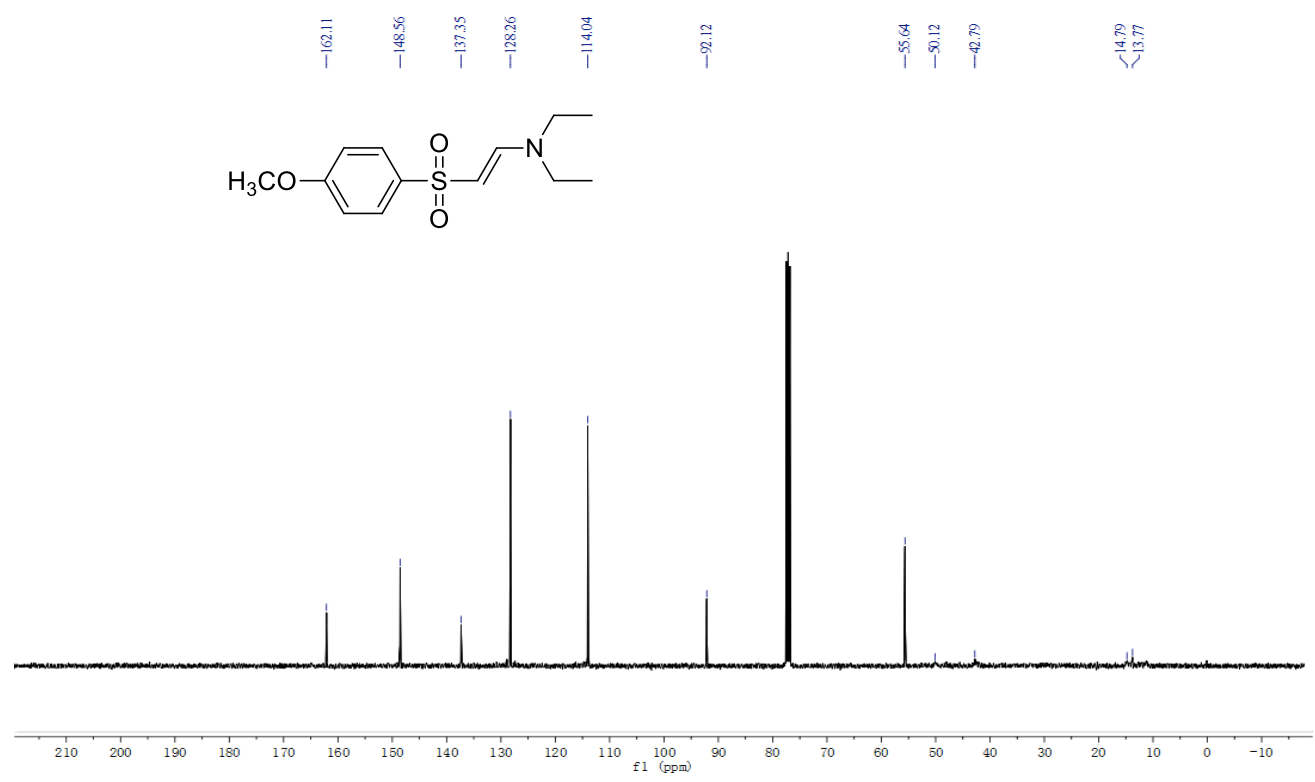

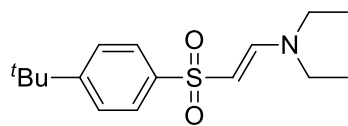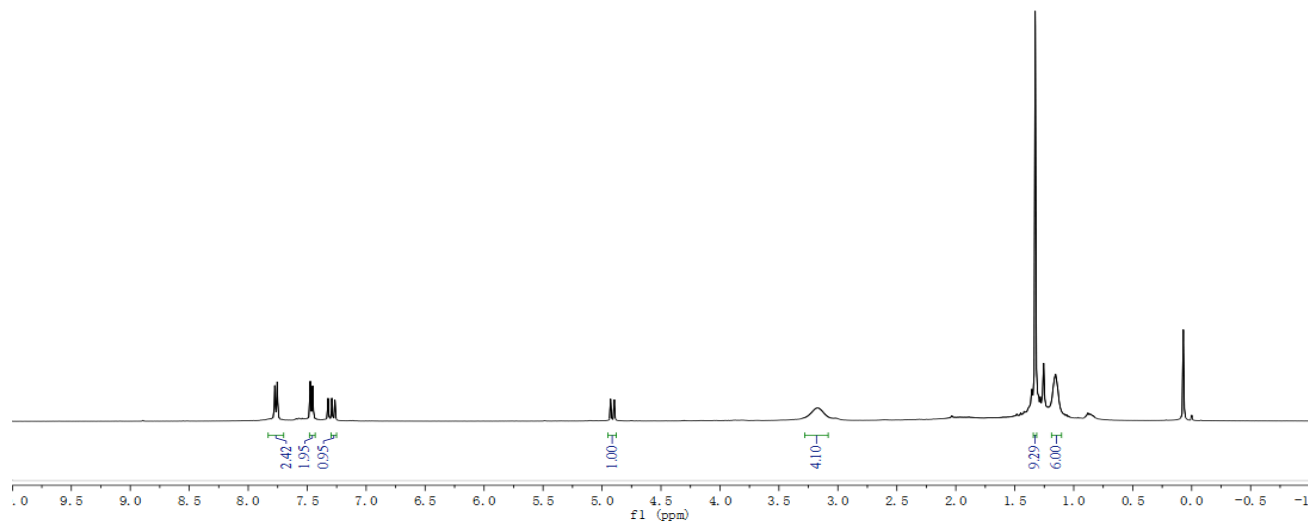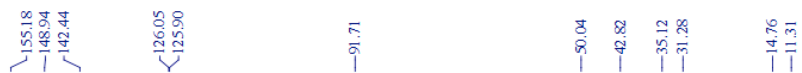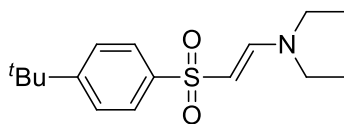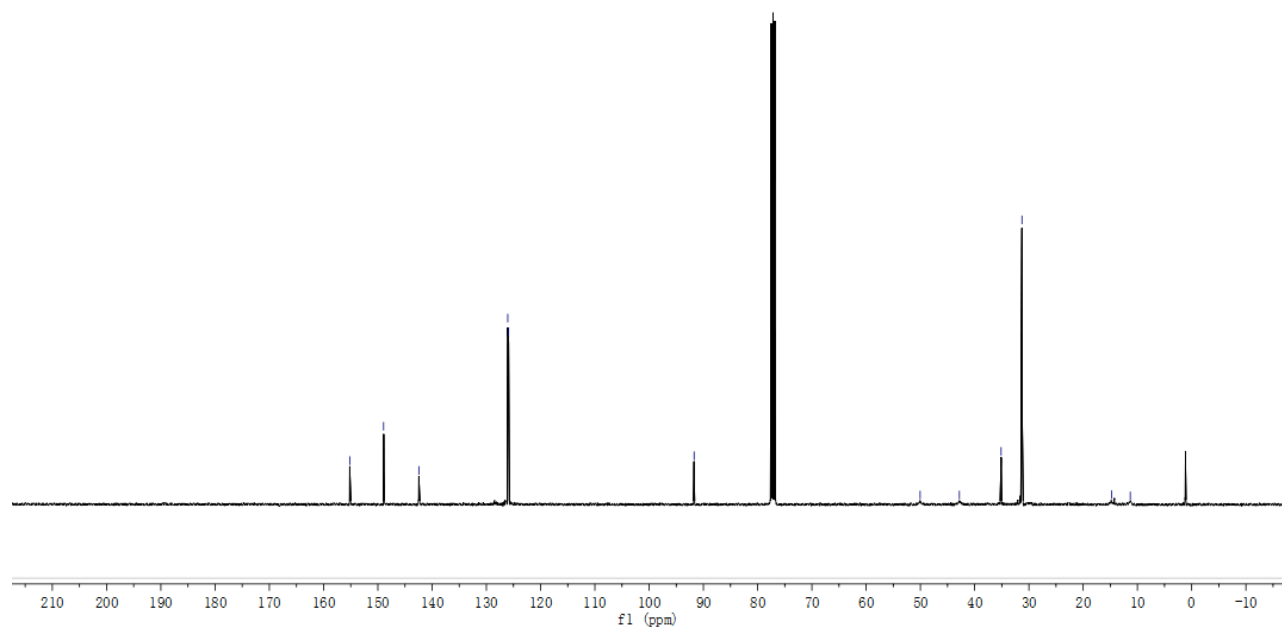

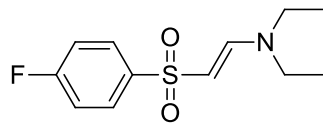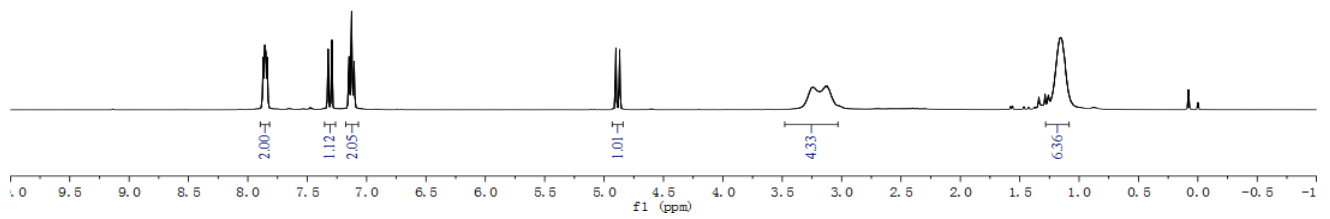

165.68  
163.17  
149.15  
141.58  
128.81  
128.72  
116.02  
115.80  
91.14  
49.88  
48.02  
14.65  
11.03

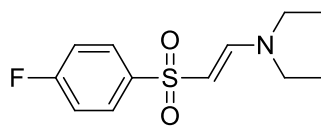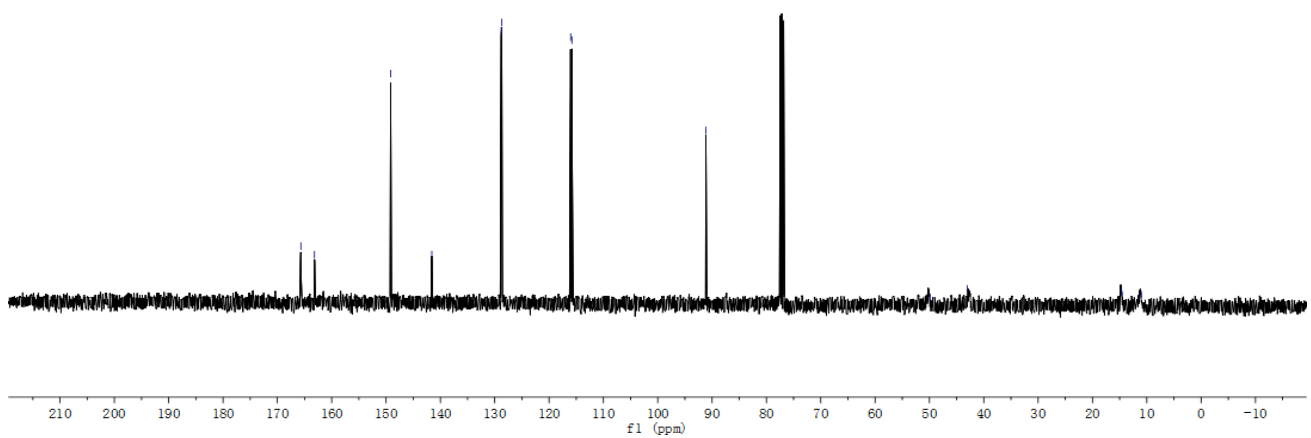

20190201-XZH-65  
F

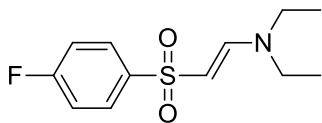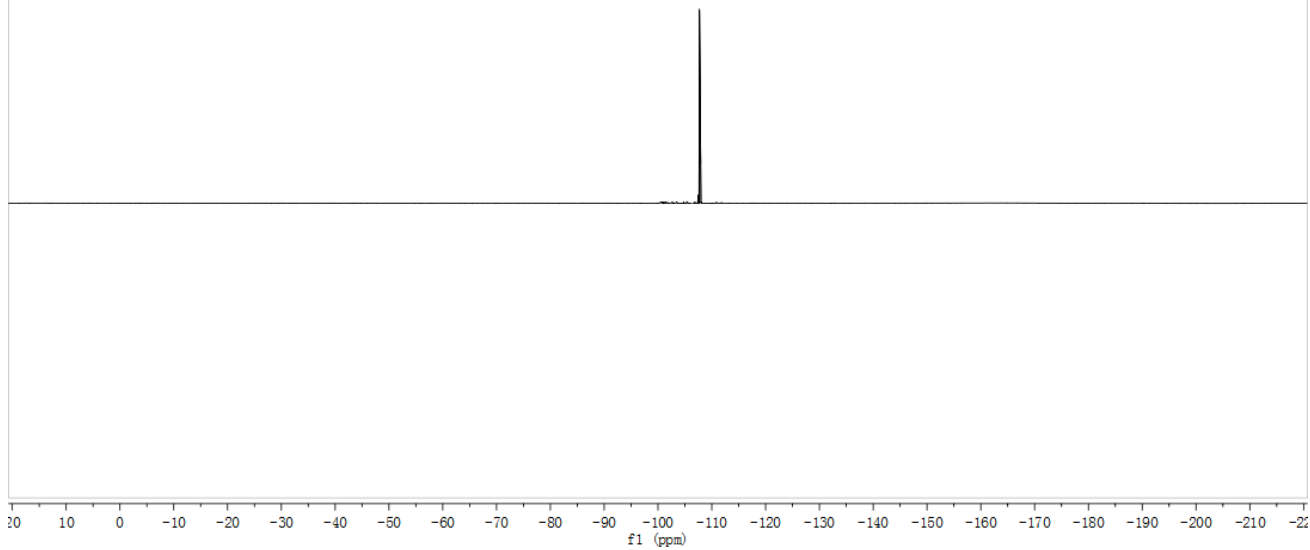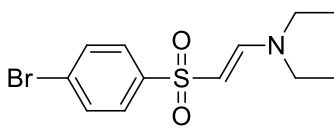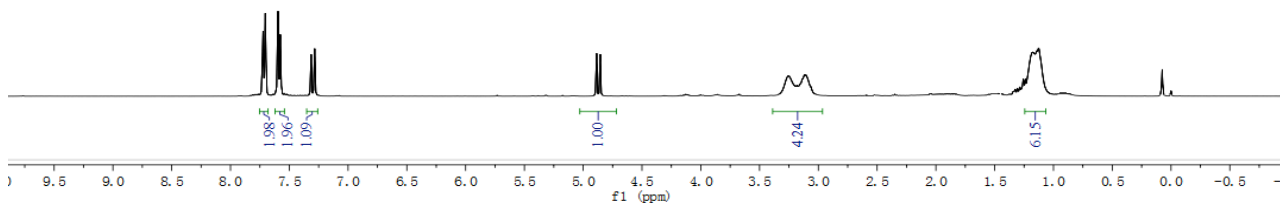

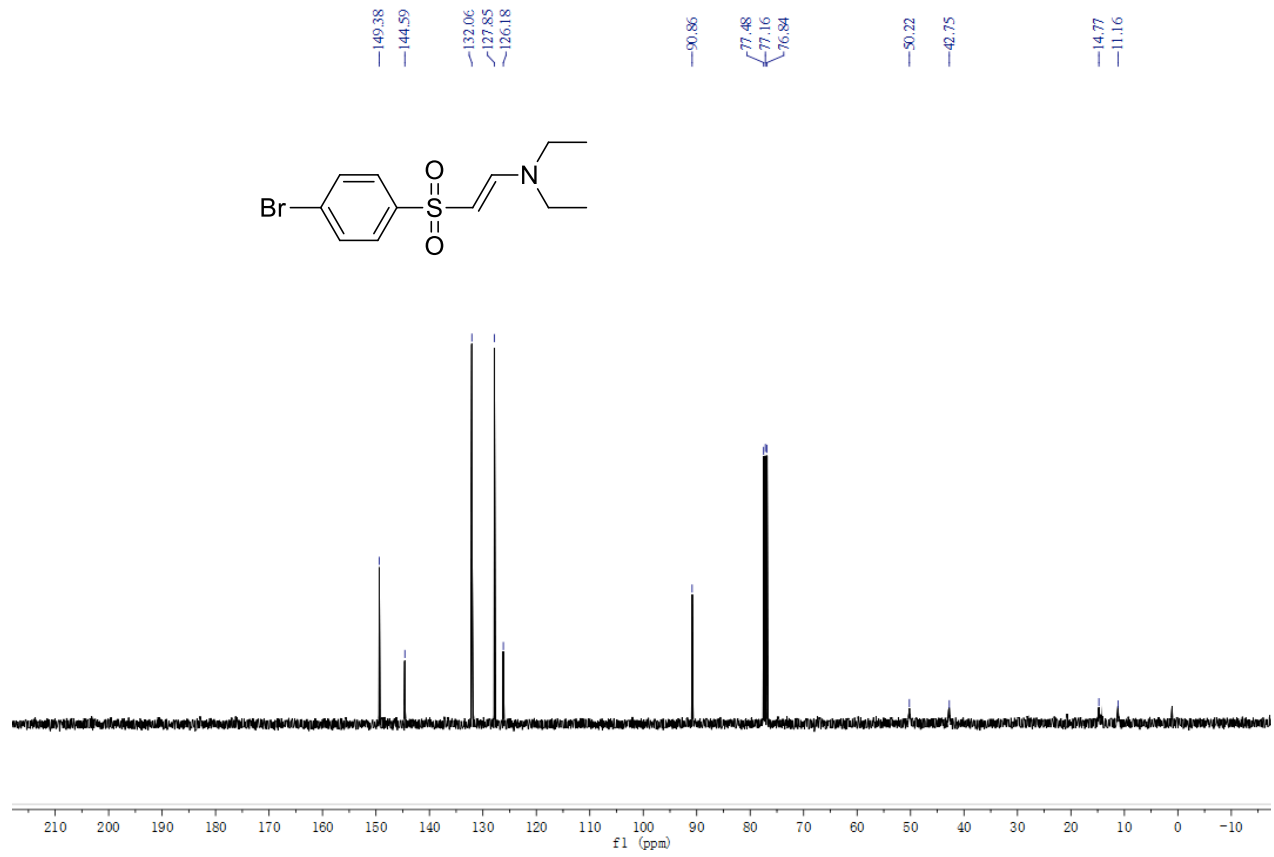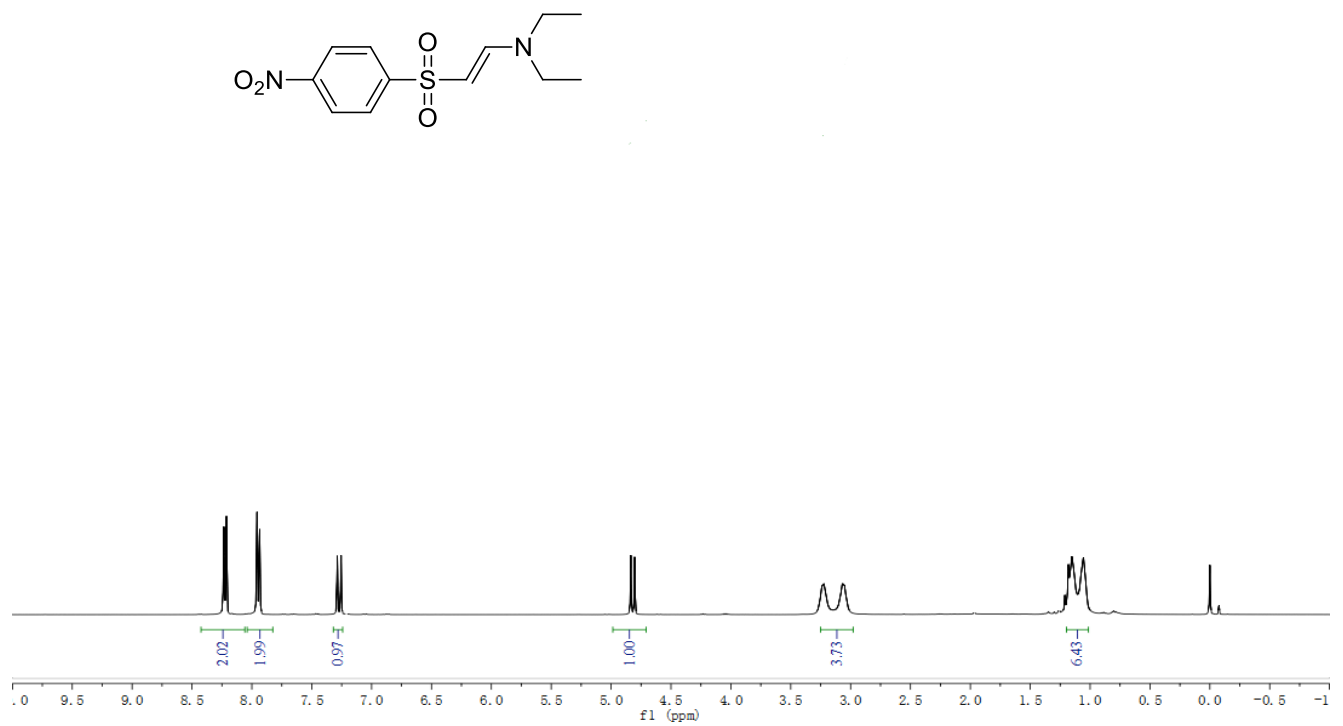

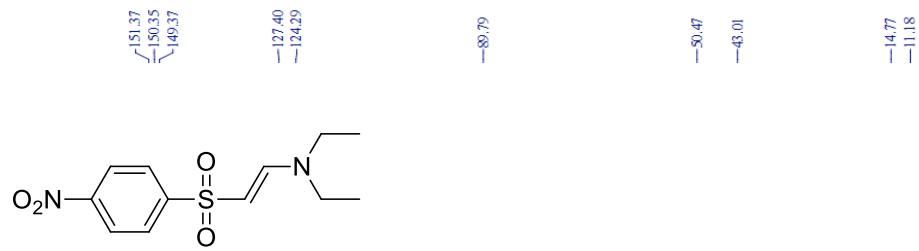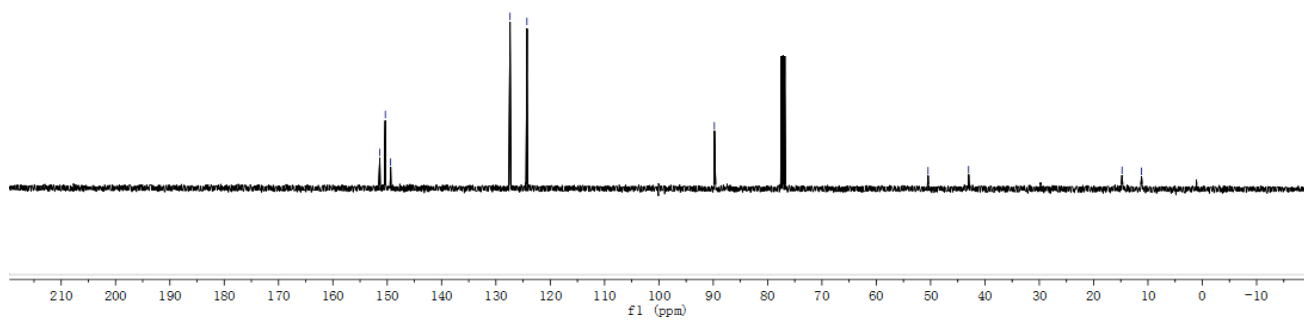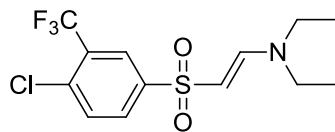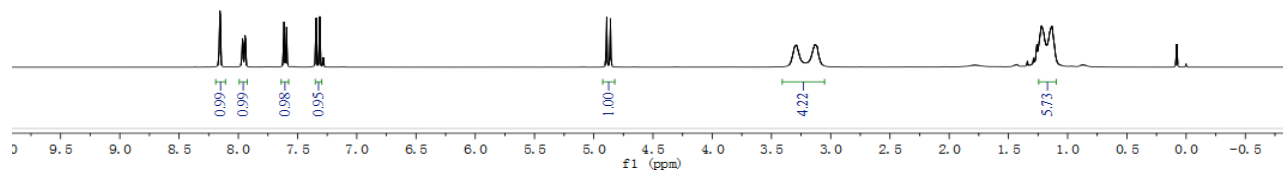

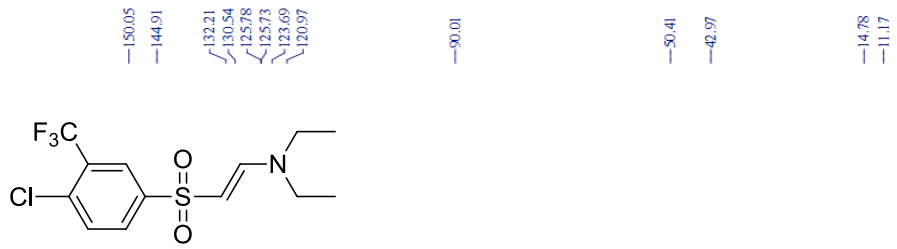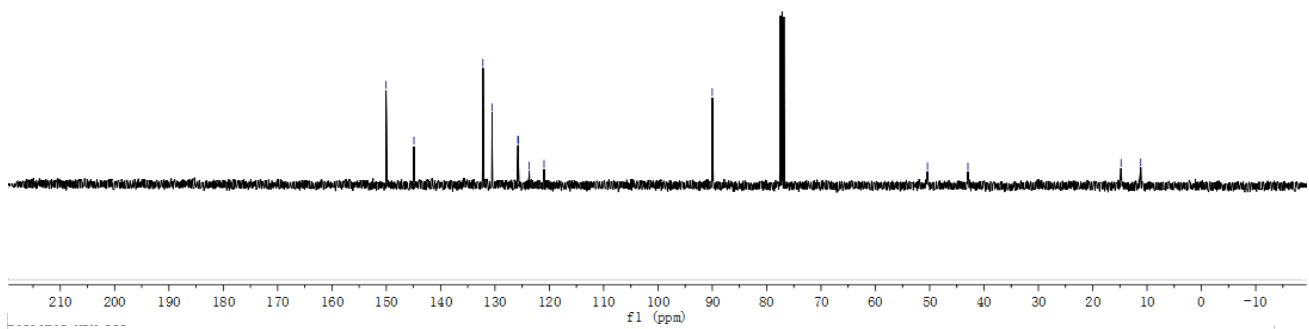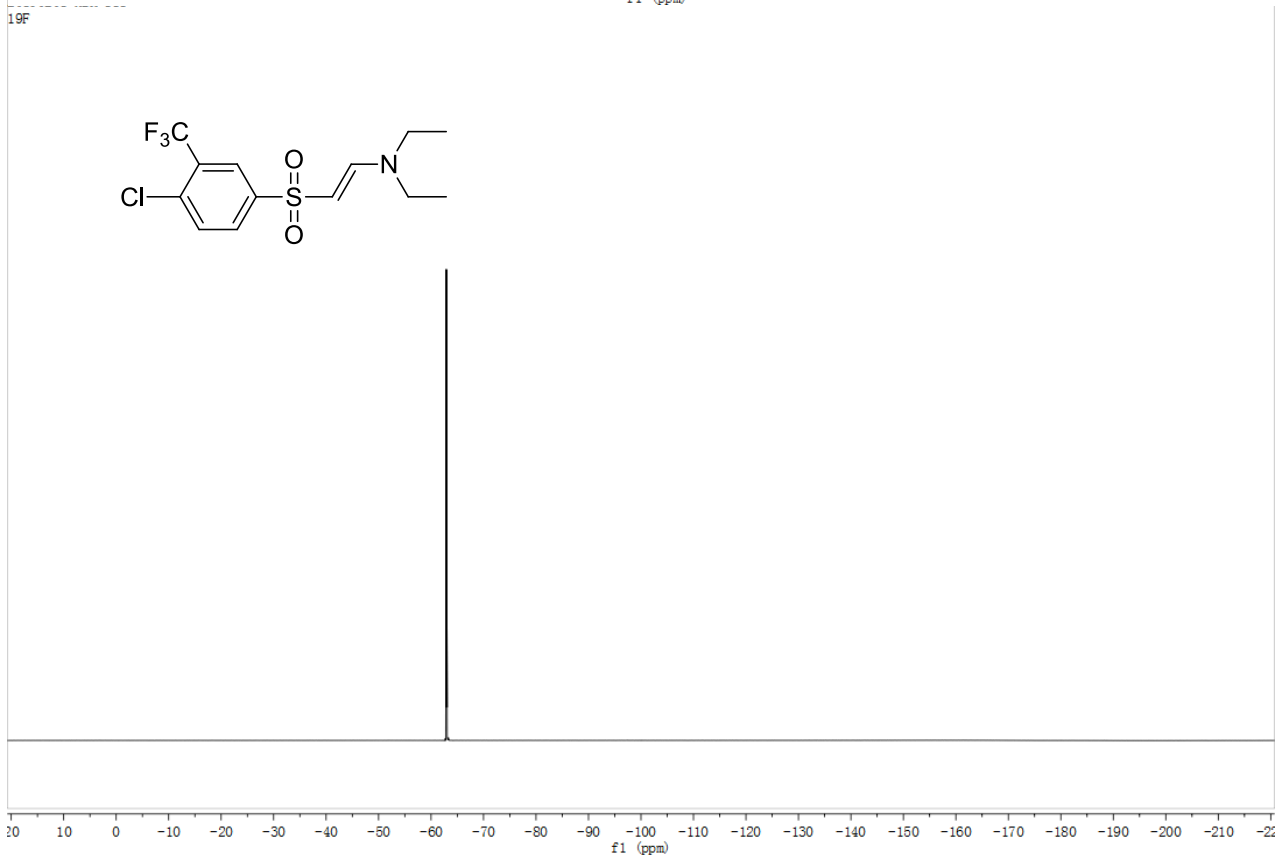



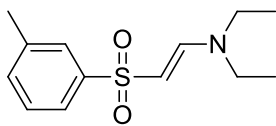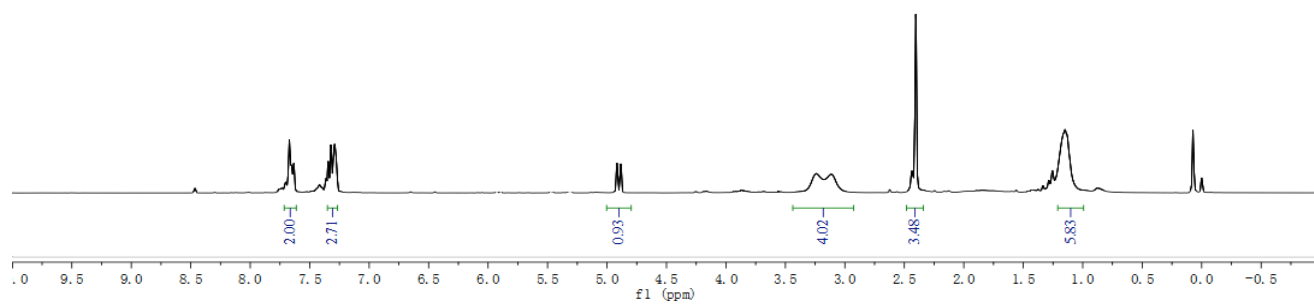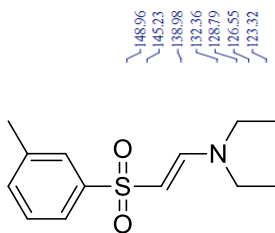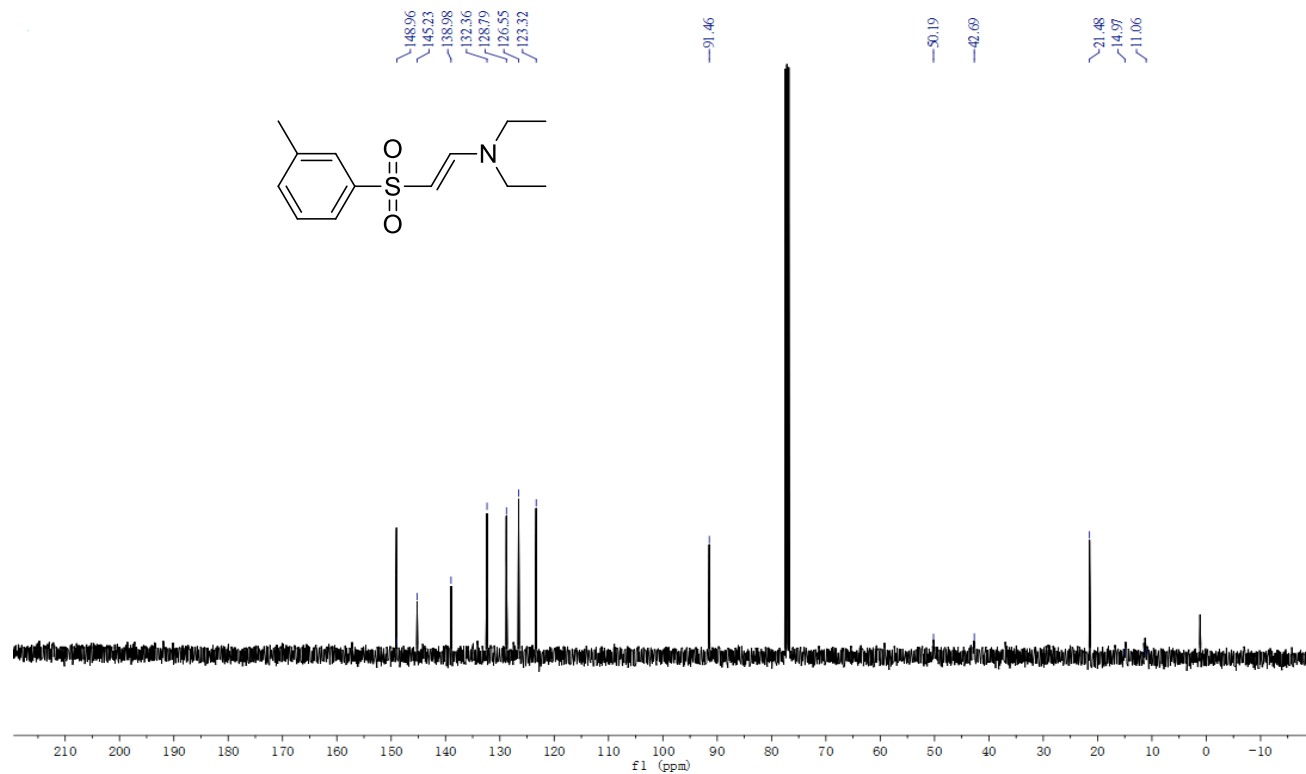

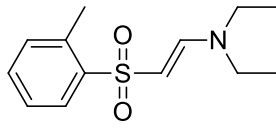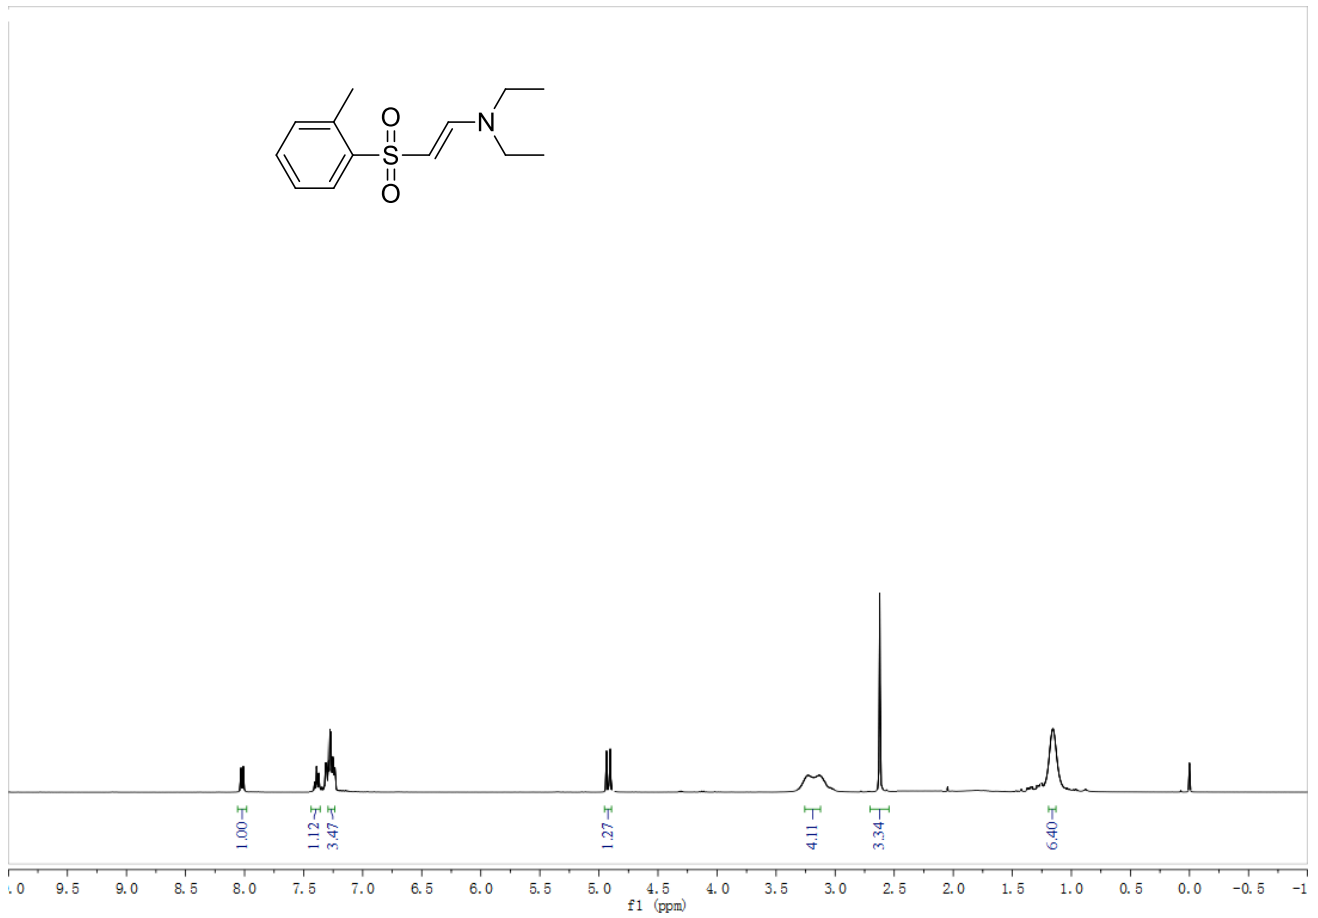

149.63  
142.81  
132.31  
131.90  
129.51  
127.76  
126.23  
90.63  
50.09  
42.85  
20.31  
14.87  
11.24

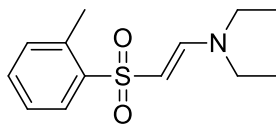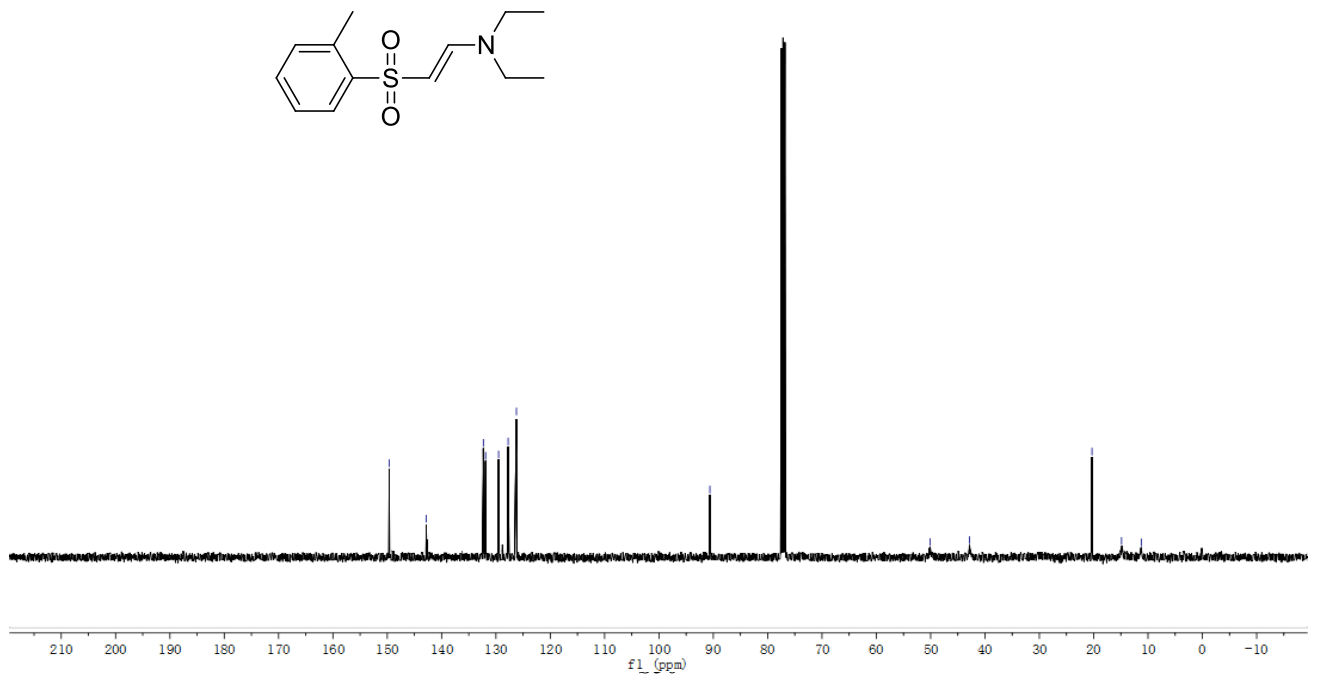

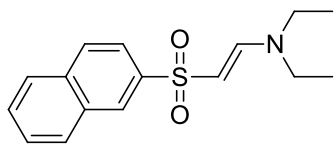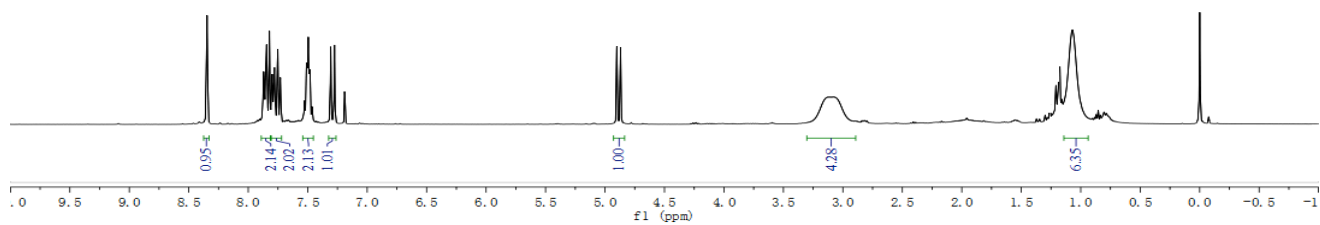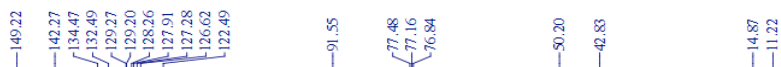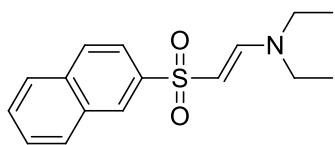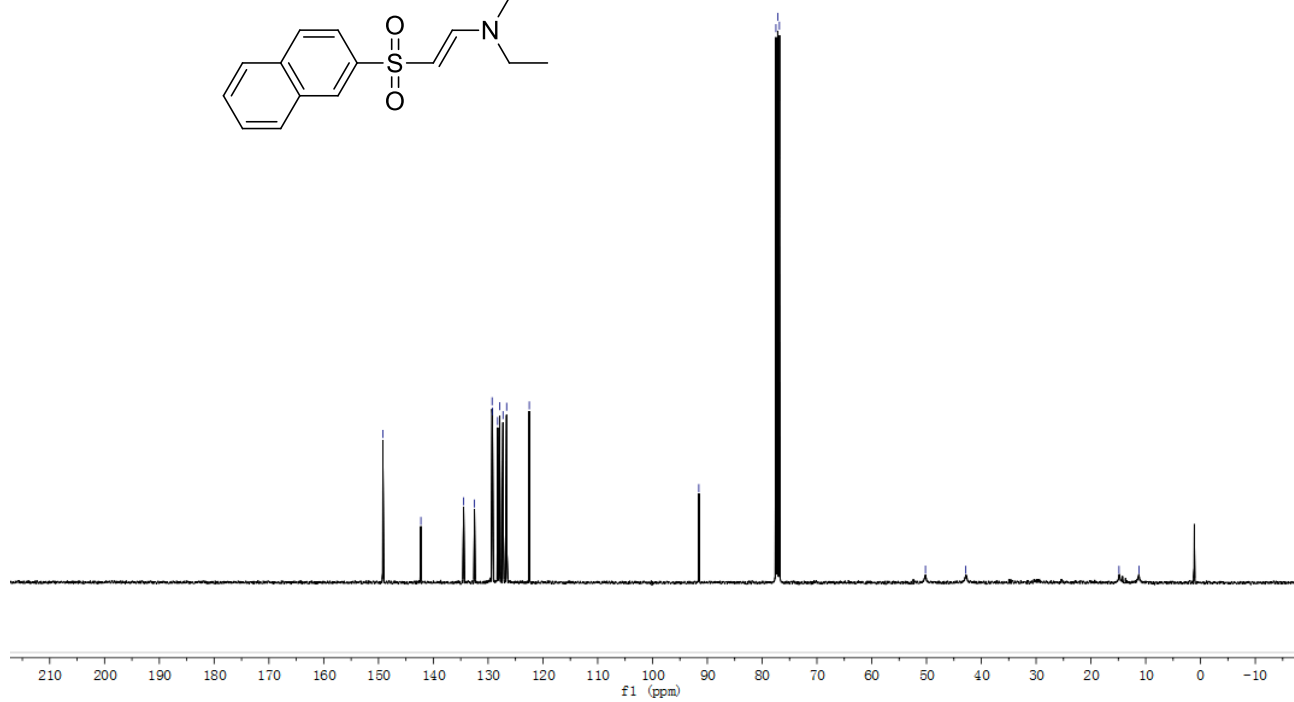

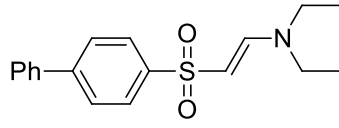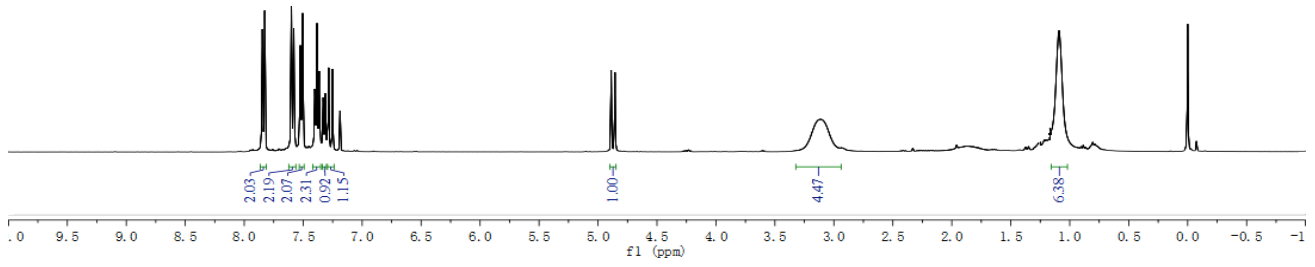

149.16  
144.52  
144.14  
139.87  
129.08  
128.28  
127.63  
127.42  
126.76  
-91.56  
-50.18  
-42.83  
-14.89  
-11.25

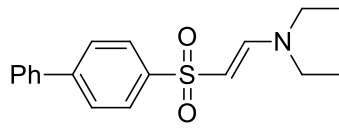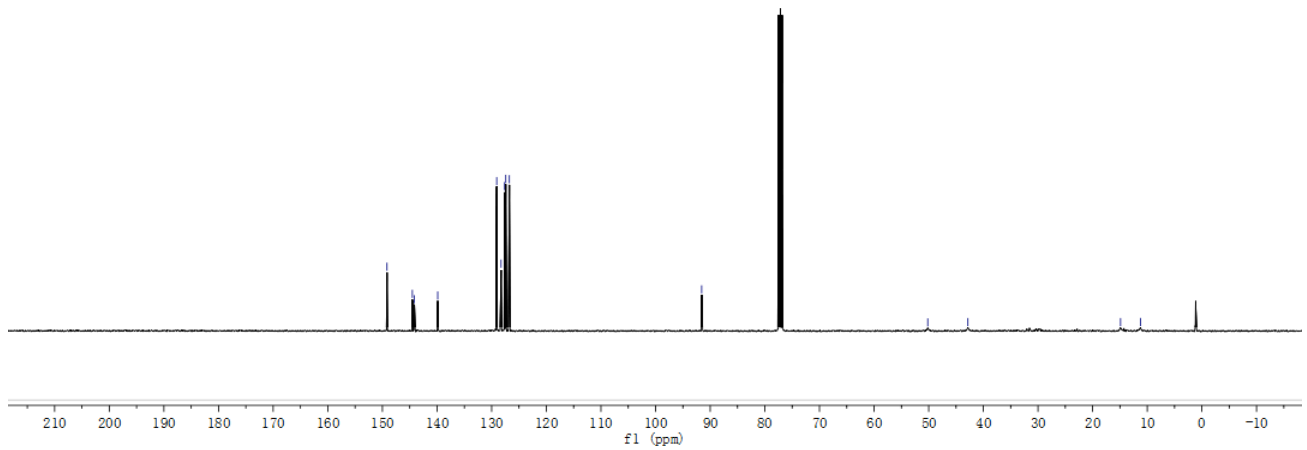

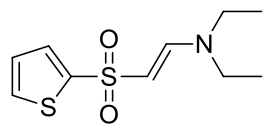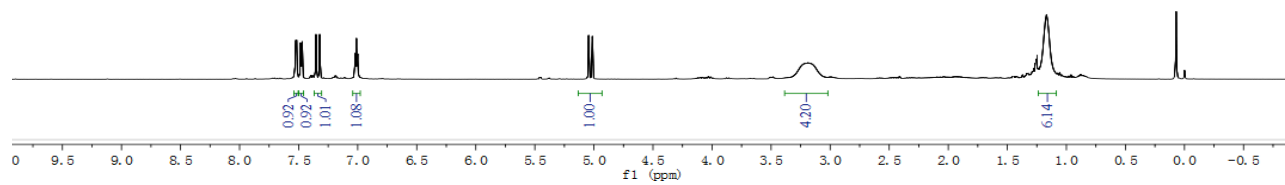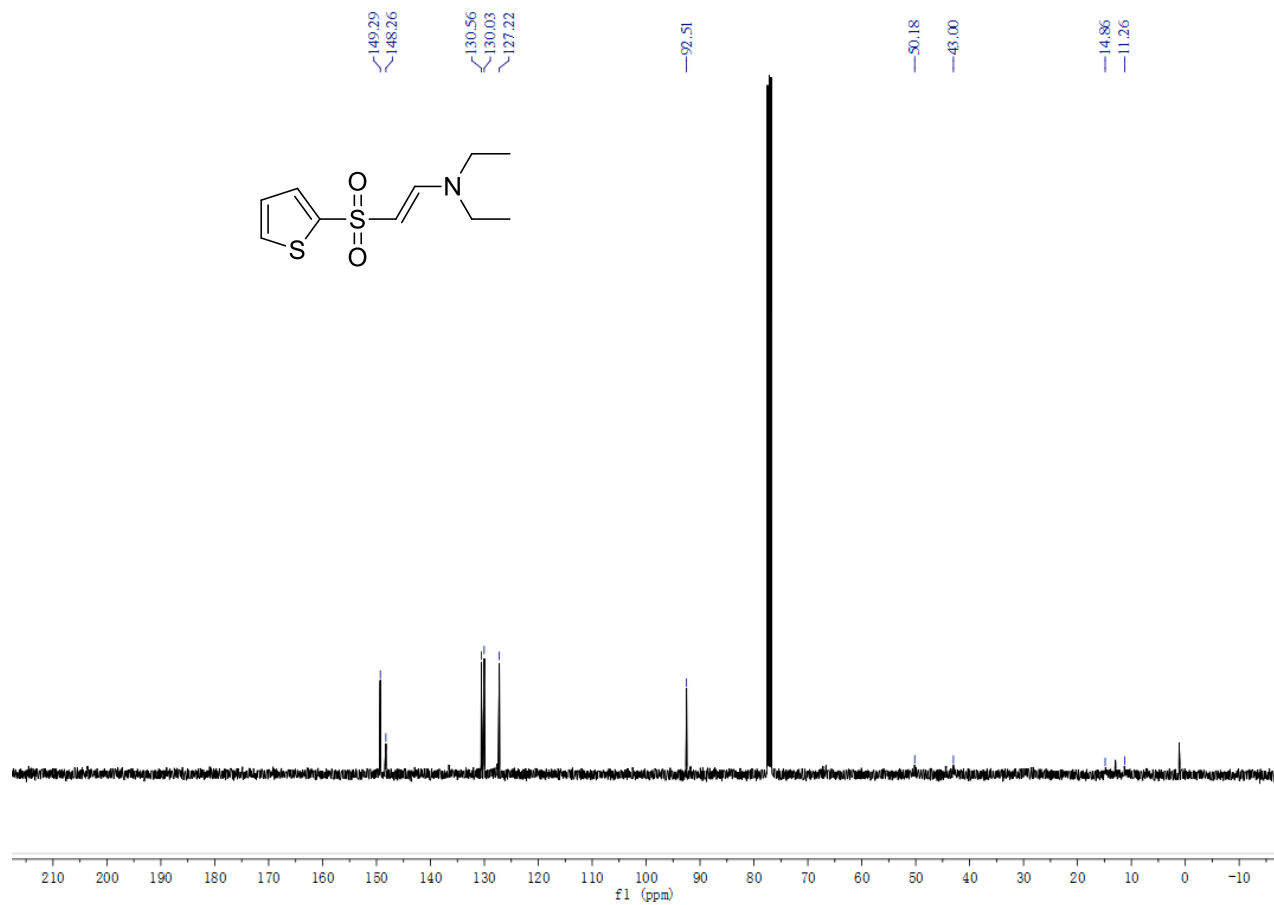

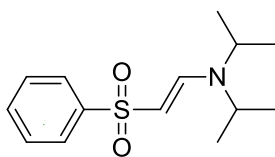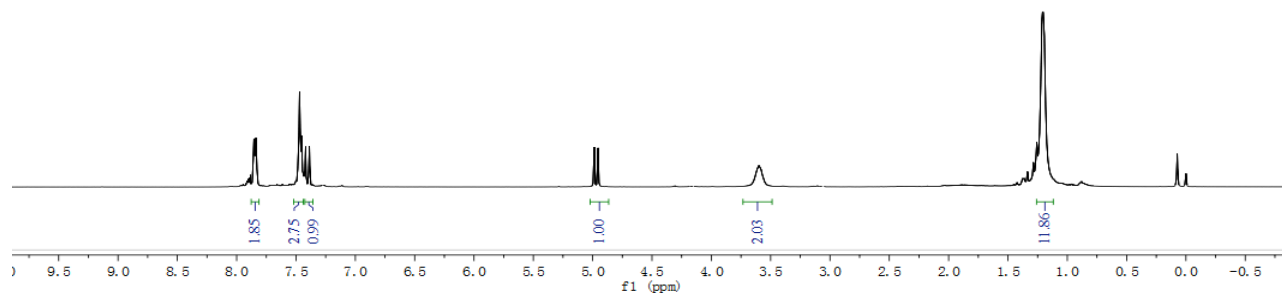

145.58  
145.38  
131.48  
128.89  
126.18  
91.35  
49.44  
47.66  
23.60  
19.76

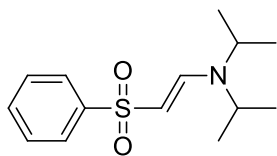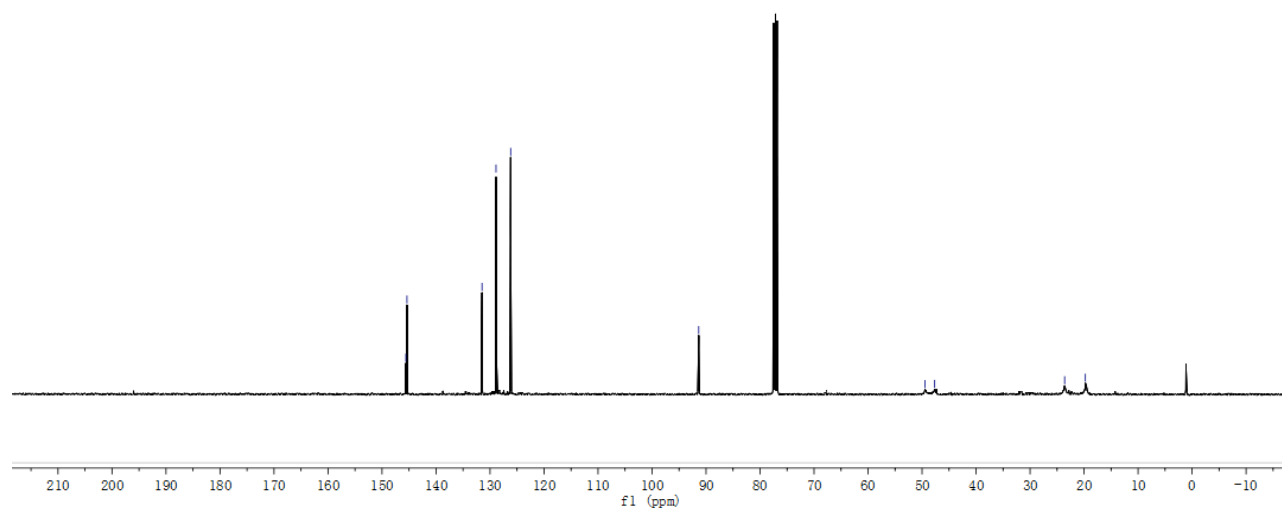

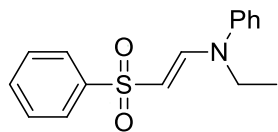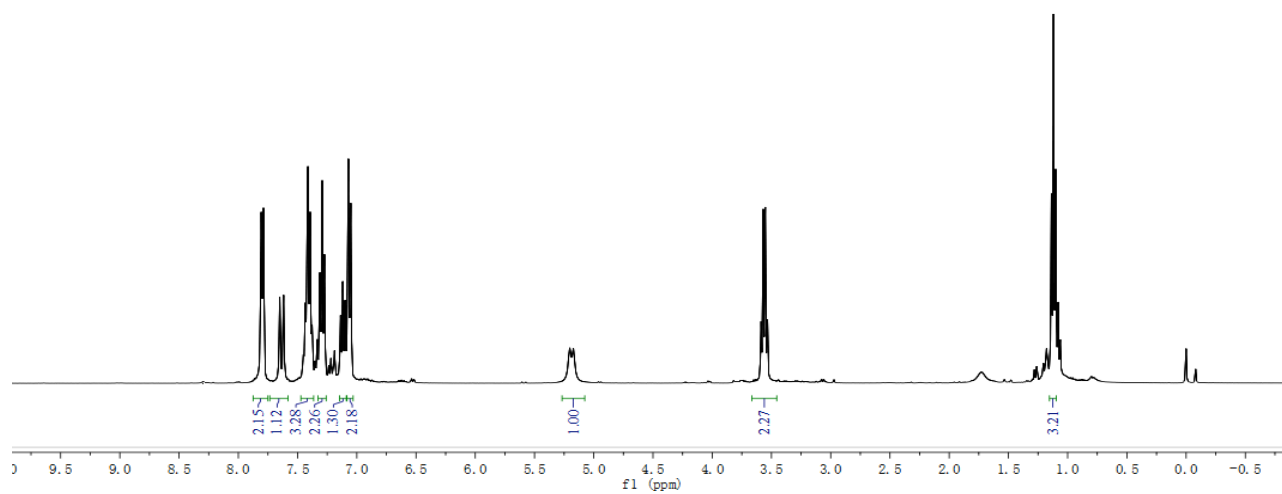

144.52, 131.96, 129.77, 129.71, 129.01, 126.95, 126.42, 125.77, 124.33, -97.52, 77.48, 77.16, 76.84, -40.15, -13.11

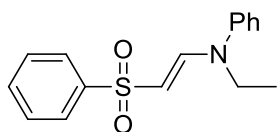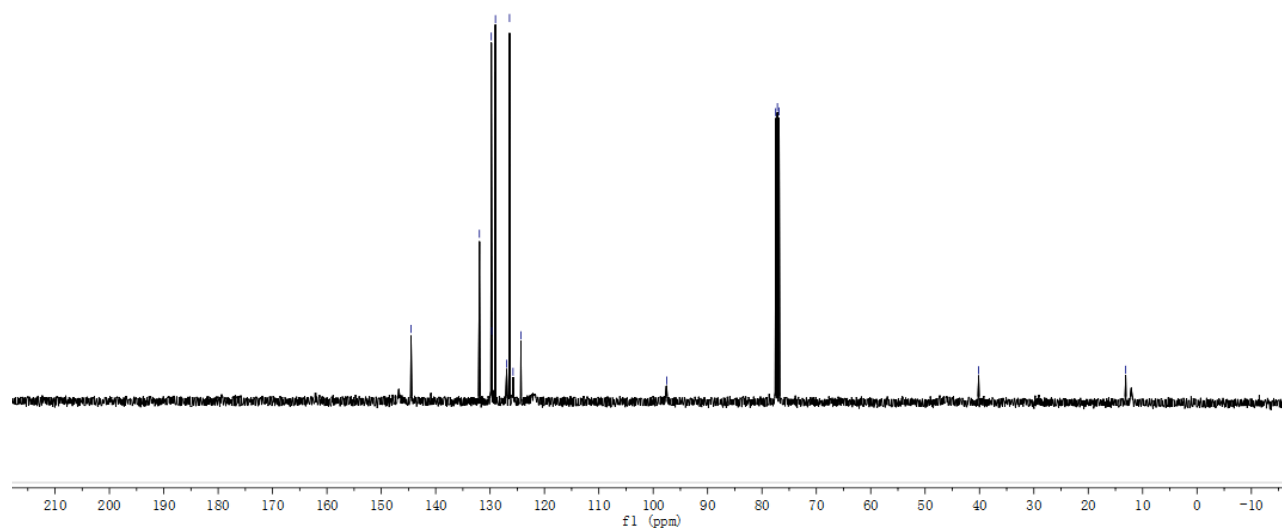

Supplement: c8ob02992j1.pdf [file c8ob02992j1.pdf]
